# Supplementary material for: A machine learning approach for predicting the nucleophilicity of organic molecules
Source: Royal Society of Chemistry journal article supplement (doi:10.1039/d1cp05072a), 2021-12-06
Supplement: d1cp05072a1.zip [file d1cp05072a1.zip]

## Sheet: Dataset3
Name of the Nucleophile	Type Of Nucleophile	Solvent	N	sN	EHF	EDFT	ECORR	EHF(HOMO)	EDFT(HOMO)	ECORR(HOMO)	EHF(LUMO)	EDFT(LUMO)	ECORR(LUMO)	χHF	χDFT	χCORR	ηHF	ηDFT	ηCORR	mHF	mDFT	mCORR	ωHF	ωDFT	ωCORR	dHF	dDFT	dCORR	HHF	HDFT	HCORR	GHF	GDFT	GCORR	NBOHF	NBODFT	NBOCORR	Mol.Mass	Surface Area	Volume	Ovality	Diameter	RG	E*DFT	E*HF	E*CORR	E*DFT(HOMO)	E*HF(HOMO)	E*CORR(HOMO)
Benzotriazole	N-Nucleophile	MeCN	7.69	0.76	-393.52	-395.975	-2.455	-0.331	-0.251	0.08	0.092	-0.056	-0.148	0.1195	0.1535	0.034	0.423	0.195	-0.228	-0.1195	-0.1535	-0.034	0.0168797	0.060416	0.0435363	5.242	5.318	0.076	-246862	-248407	-1544.98	-246885	-248430	-1545.41	-0.302	-0.336	-0.034	119.124	160.34	163.497	1.10907	8.386	1.8936	-132.801	-131.97	-0.831	-0.341	-0.475	0.134
1-Methyl-benzotriazole	N-Nucleophile	MeCN	7.77	0.76	-432.561	-435.297	-2.736	-0.327	-0.247	0.08	-0.055	0.092	0.147	0.191	0.0775	-0.1135	0.272	0.339	0.067	-0.191	-0.0775	0.1135	0.0670607	0.00885878	-0.0582019	5.512	5.565	0.053	-271341	-273064	-1722.56	-271366	-273089	-1723.02	-0.011	-0.057	-0.046	133.15	183.302	192.45	1.13731	9.607	2.0636	-132.801	-131.97	-0.831	-0.341	-0.475	0.134
1-Phenyl-N-(phenylmethyl)methanimine	N-Nucleophile	Dichloromethane	7.9	0.76	-592.302	-596.211	-3.909	-0.327	-0.25	0.077	0.09	-0.056	-0.146	0.1185	0.153	0.0345	0.417	0.194	-0.223	-0.1185	-0.153	-0.0345	0.0168372	0.0603325	0.0434952	1.956	1.713	-0.243	-371513	-373975	-2462.17	-371546	-374010	-2463.47	-0.519	-0.459	0.06	195.26	283.506	312.461	1.27337	13.573	3.5025	-959.769	-958.05	-1.719	-0.317	-0.45	0.133
1-Methyl uracil anion	N-Nucleophile	Water	8.54	0.77	-451.128	-453.773	-2.645	-0.313	-0.207	0.106	0.154	0.002	-0.152	0.0795	0.1025	0.023	0.467	0.209	-0.258	-0.0795	-0.1025	-0.023	0.00676686	0.0251346	0.0183677	12.447	11.431	-1.016	-283014	-284678	-1664.48	-283039	-284704	-1665.23	-0.853	-0.725	0.128	125.105	161.015	162.702	1.11736	8.674	1.994	-76.455	-76.055	-0.4	-0.304	-0.505	0.201
N-methyl-1-phenylmethanimine	N-Nucleophile	Dichloromethane	8.6	0.77	-362.704	-365.104	-2.4	-0.328	-0.249	0.079	0.09	-0.053	-0.143	0.119	0.151	0.032	0.418	0.196	-0.222	-0.119	-0.151	-0.032	0.016939	0.0581658	0.0412268	2.05	1.619	-0.431	-227495	-229007	-1511.81	-227521	-229033	-1512.83	-0.525	-0.456	0.069	119.164	194.099	201.264	1.16887	10.502	2.3518	-959.769	-958.05	-1.719	-0.317	-0.45	0.133
N-phenylcyclohexanimine	N-Nucleophile	Dichloromethane	8.8	1	-517.689	-518.266	-0.577	-0.31	-0.13	0.18	0.13	0.014	-0.116	0.09	0.058	-0.032	0.44	0.144	-0.296	-0.09	-0.058	0.032	0.00920455	0.0116806	0.00247601	3.322	3.992	0.67	-324686	-325096	-409.84	-324715	-325125	-409.901	-0.611	-0.704	-0.093	168.214	238.738	261.438	1.20763	11.91	2.7986	-959.769	-958.05	-1.719	-0.317	-0.45	0.133
2-Methyl-imidazole	N-Nucleophile	Water	9.45	0.54	-263.934	-265.62	-1.686	-0.319	-0.229	0.09	0.16	0.022	-0.138	0.0795	0.1035	0.024	0.479	0.251	-0.228	-0.0795	-0.1035	-0.024	0.00659734	0.0213391	0.0147418	4.915	4.802	-0.113	-165551	-166613	-1062.25	-165573	-166635	-1062.48	-0.603	-0.541	0.062	82.1038	140.225	134.429	1.10515	7.759	1.5445	-76.455	-76.055	-0.4	-0.304	-0.505	0.201
Ammonia	N-Nucleophile	Water	9.48	0.59	-56.216	-56.581	-0.365	-0.43	-0.268	0.162	0.164	0.045	-0.119	0.133	0.1115	-0.0215	0.594	0.313	-0.281	-0.133	-0.1115	0.0215	0.0148897	0.0198598	0.00497009	2.002	2.003	0.001	-35250.8	-35481.5	-230.73	-35264.5	-35495.2	-230.762	-1.025	-1.043	-0.018	17.0305	61.17	43.8269	1.01773	4.019	0.4226	-76.455	-76.055	-0.4	-0.304	-0.505	0.201
N-phenylpropan-2-imine	N-Nucleophile	Dichloromethane	9.53	0.85	-401.756	-404.435	-2.679	-0.314	-0.225	0.089	0.128	-0.021	-0.149	0.093	0.123	0.03	0.442	0.204	-0.238	-0.093	-0.123	-0.03	0.00978394	0.0370809	0.0272969	3.004	2.808	-0.196	-251981	-253670	-1688.26	-252010	-253699	-1689.03	-0.595	-0.501	0.094	133.19	214.028	229.311	1.18153	10.554	2.385	-959.769	-958.05	-1.719	-0.317	-0.45	0.133
Imidazole	N-Nucleophile	Water	9.63	0.57	-224.882	-226.288	-1.406	-0.328	-0.239	0.089	0.165	0.02	-0.145	0.0815	0.1095	0.028	0.493	0.259	-0.234	-0.0815	-0.1095	-0.028	0.00673656	0.0231472	0.0164106	4.918	4.816	-0.102	-141065	-141950	-885.463	-141084	-141969	-885.643	-0.587	-0.53	0.057	68.077	115.406	105.557	1.06863	6.613	1.2456	-76.455	-76.055	-0.4	-0.304	-0.505	0.201
2-Methyl-4,5-dihydro-1,3-oxazole	N-Nucleophile	Dichloromethane	9.81	0.77	-284.927	-286.686	-1.759	-0.376	-0.251	0.125	0.161	0.02	-0.141	0.1075	0.1155	0.008	0.537	0.271	-0.266	-0.1075	-0.1155	-0.008	0.01076	0.024613	0.013853	1.798	1.695	-0.103	-178717	-179826	-1108.78	-178740	-179849	-1109.09	-0.642	-0.557	0.085	85.104	144.182	139.623	1.10797	7.473	1.566	-959.769	-958.05	-1.719	-0.317	-0.45	0.133
1-Methyl-imidazole	N-Nucleophile	Water	9.91	0.55	-263.919	-265.606	-1.687	-0.325	-0.236	0.089	0.16	0.017	-0.143	0.0825	0.1095	0.027	0.485	0.253	-0.232	-0.0825	-0.1095	-0.027	0.00701675	0.0236961	0.0166794	5.38	5.274	-0.106	-165542	-166604	-1062.8	-165563	-166627	-1063.03	-0.451	-0.551	-0.1	82.1038	139.069	134.453	1.0959	7.716	1.5369	-76.455	-76.055	-0.4	-0.304	-0.505	0.201
2-Methyl-benzimidazole	N-Nucleophile	DMSO	10.02	0.85	-416.625	-419.306	-2.681	-0.307	-0.232	0.075	0.119	-0.025	-0.144	0.094	0.1285	0.0345	0.426	0.207	-0.219	-0.094	-0.1285	-0.0345	0.0103709	0.0398847	0.0295138	5.058	4.987	-0.071	-261334	-263022	-1688.06	-261359	-263048	-1688.61	-0.628	-0.557	0.071	132.162	192.309	201.291	1.15799	10.027	2.1759	-553.272	-551.617	-1.655	-0.237	-0.369	0.132
1-(2-Methyl-4,5-dihydro-1H-imidazol-1-yl)ethanone	N-Nucleophile	Dichloromethane	10.03	0.75	-377.865	-380.185	-2.32	-0.358	-0.246	0.112	0.149	-0.024	-0.173	0.1045	0.135	0.0305	0.507	0.222	-0.285	-0.1045	-0.135	-0.0305	0.0107695	0.0410473	0.0302778	5.621	5.354	-0.267	-237020	-238482	-1461.9	-237046	-238508	-1461.63	-0.6	-0.496	0.104	112.13	166.111	171.728	1.11197	8.498	1.947	-959.769	-958.05	-1.719	-0.317	-0.45	0.133
Theophylline anion	N-Nucleophile	Water	10.06	0.71	-636.993	-640.767	-3.774	-0.275	-0.19	0.085	0.16	0.002	-0.158	0.0575	0.094	0.0365	0.435	0.192	-0.243	-0.0575	-0.094	-0.0365	0.00380029	0.0230104	0.0192101	6.447	6.166	-0.281	-399613	-401988	-2375.29	-399642	-402019	-2376.18	-0.623	-0.579	0.044	179.156	207.633	223.677	1.16539	9.851	2.3425	-76.455	-76.055	-0.4	-0.304	-0.505	0.201
2,2,2-Trifluoroethylamine	N-Nucleophile	MeCN	10.13	0.75	-430.968	-433.038	-2.07	-0.417	-0.262	0.155	0.162	0.041	-0.121	0.1275	0.1105	-0.017	0.579	0.303	-0.276	-0.1275	-0.1105	0.017	0.0140382	0.0201489	0.00611071	4.093	3.888	-0.205	-270385	-271687	-1302.67	-270407	-271711	-1303.14	-0.853	-0.847	0.006	99.055	120.533	110.039	1.08558	7.043	1.5297	-132.801	-131.97	-0.831	-0.341	-0.475	0.134
2-Methyl-4,5-dihydrothiazole	N-Nucleophile	Dichloromethane	10.2	0.71	-607.578	-609.663	-2.085	-0.343	-0.237	0.106	0.143	-0.006	-0.149	0.1	0.1215	0.0215	0.486	0.231	-0.255	-0.1	-0.1215	-0.0215	0.0102881	0.0319529	0.0216649	1.076	0.969	-0.107	-381186	-382498	-1312.8	-381209	-382522	-1313.25	-0.572	-0.498	0.074	101.17	154.341	155.611	1.10334	7.955	1.643	-959.769	-958.05	-1.719	-0.317	-0.45	0.133
2,5-Dimethyl-benzimidazole	N-Nucleophile	DMSO	10.21	0.85	-455.67	-458.632	-2.962	-0.3	-0.227	0.073	0.12	-0.023	-0.143	0.09	0.125	0.035	0.42	0.204	-0.216	-0.09	-0.125	-0.035	0.00964286	0.0382966	0.0286537	4.805	4.705	-0.1	-285815	-287681	-1865.83	-285844	-287710	-1866.6	-0.626	-0.557	0.069	146.189	214.542	229.234	1.18463	11.015	2.427	-553.272	-551.617	-1.655	-0.237	-0.369	0.132
Formohydrazide	N-Nucleophile	MeCN	10.35	0.76	-224.002	-225.29	-1.288	-0.409	-0.27	0.139	0.17	0.014	-0.156	0.1195	0.128	0.0085	0.579	0.284	-0.295	-0.1195	-0.128	-0.0085	0.0123318	0.0288451	0.0165132	3.338	3.082	-0.256	-140517	-141328	-811.379	-140537	-141349	-811.881	-0.499	-0.438	0.061	60.055	104.771	91.0177	1.07089	6.066	1.30601	-132.801	-131.97	-0.831	-0.341	-0.475	0.134
1-Methyl-benzimidazole	N-Nucleophile	MeCN	10.37	0.82	-416.609	-419.29	-2.681	-0.311	-0.234	0.077	0.114	-0.029	-0.143	0.0985	0.1315	0.033	0.425	0.205	-0.22	-0.0985	-0.1315	-0.033	0.0114144	0.0421762	0.0307618	5.278	5.194	-0.084	-261323	-263012	-1688.86	-261348	-263038	-1689.35	-0.472	-0.39	0.082	132.163	188.899	200.884	1.13899	9.635	2.078	-132.801	-131.97	-0.831	-0.341	-0.475	0.134
Nicotine	N-Nucleophile	Dichloromethane	10.4	1.04	-534.871	-538.432	-3.561	-0.333	-0.214	0.119	0.117	-0.031	-0.148	0.108	0.1225	0.0145	0.45	0.183	-0.267	-0.108	-0.1225	-0.0145	0.01296	0.0410007	0.0280407	3.978	3.849	-0.129	-335460	-337705	-2245.06	-335491	-337736	-2245.96	-0.533	-0.482	0.051	176.258	242.458	288.86	1.14754	10.579	2.5045	-959.769	-958.05	-1.719	-0.317	-0.45	0.133
tert-Butylamine	N-Nucleophile	Water	10.48	0.65	-212.387	-213.875	-1.488	-0.388	-0.244	0.144	0.15	0.034	-0.116	0.119	0.105	-0.014	0.538	0.278	-0.26	-0.119	-0.105	0.014	0.0131608	0.0198291	0.00666836	1.678	1.635	-0.043	-133172	-134111	-939.494	-133194	-134134	-939.947	-0.877	-0.872	0.005	73.1368	149.096	155.107	1.06816	6.726	1.51389	-76.455	-76.055	-0.4	-0.304	-0.505	0.201
4-Chloropyridine	N-Nucleophile	Water	10.5	0.73	-705.677	-707.973	-2.296	-0.363	-0.279	0.084	0.1	-0.046	-0.146	0.1315	0.1625	0.031	0.463	0.233	-0.23	-0.1315	-0.1625	-0.031	0.0186741	0.0566658	0.0379916	0.514	0.668	0.154	-442762	-444206	-1444.41	-442784	-444229	-1444.77	-0.538	-0.483	0.055	113.545	148.875	147.574	1.10256	7.293	1.90236	-76.455	-76.055	-0.4	-0.304	-0.505	0.201
Benzimidazole	N-Nucleophile	DMSO	10.5	0.79	-377.571	-379.972	-2.401	-0.313	-0.238	0.075	0.115	-0.029	-0.144	0.099	0.1335	0.0345	0.428	0.209	-0.219	-0.099	-0.1335	-0.0345	0.0114498	0.042637	0.0311872	4.83	4.758	-0.072	-236846	-238357	-1511.37	-236869	-238381	-1511.78	-0.613	-0.544	0.069	118.136	167.693	172.481	1.11929	8.993	1.9073	-553.272	-551.617	-1.655	-0.237	-0.369	0.132
5-Methyl-benzimidazole	N-Nucleophile	DMSO	10.69	0.79	-416.616	-419.299	-2.683	-0.306	-0.232	0.074	0.117	-0.026	-0.143	0.0945	0.129	0.0345	0.423	0.206	-0.217	-0.0945	-0.129	-0.0345	0.0105559	0.0403908	0.0298349	4.638	4.545	-0.093	-261328	-263017	-1689.14	-261354	-263043	-1689.73	-0.611	-0.544	0.067	132.162	189.919	200.458	1.14676	9.993	2.171	-553.272	-551.617	-1.655	-0.237	-0.369	0.132
Uracil anion	N-Nucleophile	Water	10.75	0.53	-412.103	-414.467	-2.364	-0.293	-0.196	0.097	0.151	-0.002	-0.153	0.071	0.099	0.028	0.444	0.194	-0.25	-0.071	-0.099	-0.028	0.0056768	0.0252603	0.0195835	3.348	2.906	-0.442	-258545	-260032	-1486.7	-258568	-260055	-1487.12	-0.731	-0.678	0.053	111.079	139.453	134.848	1.09678	7.838	1.8348	-76.455	-76.055	-0.4	-0.304	-0.505	0.201
9-Methyl guanine anion	N-Nucleophile	Water	10.77	0.65	-578.101	-581.555	-3.454	-0.27	-0.181	0.089	0.168	0.017	-0.151	0.051	0.082	0.031	0.438	0.198	-0.24	-0.051	-0.082	-0.031	0.00296918	0.0169798	0.0140106	13.367	12.673	-0.694	-362669	-364842	-2173.08	-362697	-364871	-2173.96	-0.825	-0.708	0.117	164.145	198.767	206.608	1.17626	9.822	2.31508	-76.455	-76.055	-0.4	-0.304	-0.505	0.201
Saccharin anion	N-Nucleophile	MeCN	10.78	0.89	-944.173	-948.029	-3.856	-0.349	-0.234	0.115	0.091	-0.048	-0.139	0.129	0.141	0.012	0.44	0.186	-0.254	-0.129	-0.141	-0.012	0.0189102	0.0534435	0.0345333	13.315	12.289	-1.026	-592402	-594826	-2424.57	-592429	-594854	-2425.43	-1.058	-0.923	0.135	182.177	192.014	203.826	1.14661	9.062	2.2499	-132.801	-131.97	-0.831	-0.341	-0.475	0.134
Glycinenitrile	N-Nucleophile	Water	10.8	0.61	-187.006	-188.159	-1.153	-0.422	-0.268	0.154	0.147	0.007	-0.14	0.1375	0.1305	-0.007	0.569	0.275	-0.294	-0.1375	-0.1305	0.007	0.0166136	0.0309641	0.0143505	6.04	5.789	-0.251	-117302	-118029	-726.345	-117322	-118049	-726.578	-0.832	-0.828	0.004	56.0666	109.91	96.4097	1.08114	7.096	1.46112	-76.455	-76.055	-0.4	-0.304	-0.505	0.201
6-Methoxy-quinoline	N-Nucleophile	MeCN	10.86	0.66	-513.348	-516.586	-3.238	-0.302	-0.226	0.076	0.074	-0.064	-0.138	0.114	0.145	0.031	0.376	0.162	-0.214	-0.114	-0.145	-0.031	0.0172819	0.064892	0.0476101	1.908	2.575	0.667	-322012	-324051	-2038.66	-322040	-324079	-2039.09	-0.524	-0.478	0.046	159.185	216.095	234.354	1.17576	11.681	2.5654	-132.801	-131.97	-0.831	-0.341	-0.475	0.134
3-Methylpyridine	N-Nucleophile	Dichloromethane	10.9	0.93	-285.801	-287.68	-1.879	-0.339	-0.261	0.078	0.112	-0.035	-0.147	0.1135	0.148	0.0345	0.451	0.226	-0.225	-0.1135	-0.148	-0.0345	0.0142819	0.0484602	0.0341783	3.132	3.105	-0.027	-179261	-180445	-1183.49	-179284	-180468	-1183.84	-0.527	-0.479	0.048	93.1264	155.591	157.018	1.10562	8.241	1.7433	-959.769	-958.05	-1.719	-0.317	-0.45	0.133
Adenine anion	N-Nucleophile	Water	10.93	0.62	-464.154	-466.969	-2.815	-0.28	-0.196	0.084	0.15	0.001	-0.149	0.065	0.0975	0.0325	0.43	0.197	-0.233	-0.065	-0.0975	-0.0325	0.00491279	0.0241275	0.0192147	6.026	6.038	0.012	-291189	-292961	-1771.66	-291213	-292985	-1772.19	-0.681	-0.637	0.044	134.119	164.908	166.877	1.12521	8.784	1.9835	-76.455	-76.055	-0.4	-0.304	-0.505	0.201
Purine anion	N-Nucleophile	Water	11	0.54	-409.088	-411.58	-2.492	-0.296	-0.217	0.079	0.124	-0.022	-0.146	0.086	0.1195	0.0335	0.42	0.195	-0.225	-0.086	-0.1195	-0.0335	0.00880476	0.036616	0.0278113	2.43	2.067	-0.363	-256647	-258215	-1567.89	-256670	-258238	-1568.29	-0.735	-0.634	0.101	119.104	149.334	148.424	1.10174	8.777	1.8387	-76.455	-76.055	-0.4	-0.304	-0.505	0.201
5-Methoxy-benzimidazole	N-Nucleophile	DMSO	11	0.71	-491.479	-494.524	-3.045	-0.299	-0.216	0.083	0.111	-0.03	-0.141	0.094	0.123	0.029	0.41	0.186	-0.224	-0.094	-0.123	-0.029	0.0107756	0.0406694	0.0298937	6.227	5.934	-0.293	-308301	-310218	-1917.11	-308328	-310245	-1917.54	-0.613	-0.545	0.068	148.162	199.719	211.264	1.16446	11.209	2.40375	-553.272	-551.617	-1.655	-0.237	-0.369	0.132
Semicarbazide	N-Nucleophile	Water	11.05	0.52	-279.076	-280.684	-1.608	-0.412	-0.261	0.151	0.162	0.036	-0.126	0.125	0.1125	-0.0125	0.574	0.297	-0.277	-0.125	-0.1125	0.0125	0.0136106	0.0213068	0.00769619	3.898	3.993	0.095	-175064	-176077	-1012.52	-175086	-176100	-1013.42	-0.529	-0.825	-0.296	75.0699	120.533	109.31	1.09041	7.175	1.49448	-76.455	-76.055	-0.4	-0.304	-0.505	0.201
Pyridine	N-Nucleophile	Water	11.05	0.73	-246.756	-248.352	-1.596	-0.351	-0.268	0.083	0.113	-0.036	-0.149	0.119	0.152	0.033	0.464	0.232	-0.232	-0.119	-0.152	-0.033	0.0152597	0.0497931	0.0345334	2.958	2.896	-0.062	-154779	-155784	-1005.34	-154799	-155805	-1005.59	-0.544	-0.489	0.055	79.0999	133.211	129.034	1.07893	7.291	1.46813	-76.455	-76.055	-0.4	-0.304	-0.505	0.201
2-Formyl-imidazole anion	N-Nucleophile	Water	11.07	0.5	-337.153	-339.166	-2.013	-0.277	-0.201	0.076	0.131	-0.024	-0.155	0.073	0.1125	0.0395	0.408	0.177	-0.231	-0.073	-0.1125	-0.0395	0.00653064	0.0357521	0.0292215	3.011	3.444	0.433	-211517	-212784	-1266.28	-211539	-212806	-1266.5	-0.615	-0.568	0.047	95.0794	134.909	126.641	1.10641	8.285	1.76747	-76.455	-76.055	-0.4	-0.304	-0.505	0.201
5,6-Dimethyl-benzimidazole	N-Nucleophile	Water	11.08	0.71	-455.66	-458.625	-2.965	-0.299	-0.227	0.072	0.121	-0.023	-0.144	0.089	0.125	0.036	0.42	0.204	-0.216	-0.089	-0.125	-0.036	0.00942976	0.0382966	0.0288668	4.691	4.634	-0.057	-285809	-287676	-1867.2	-285836	-287704	-1867.8	-0.612	-0.546	0.066	146.189	207.371	226.583	1.15395	10.016	2.32744	-76.455	-76.055	-0.4	-0.304	-0.505	0.201
4-Methylpyridine	N-Nucleophile	Water	11.1	0.75	-285.804	-287.681	-1.877	-0.349	-0.267	0.082	0.117	-0.032	-0.149	0.116	0.1495	0.0335	0.466	0.235	-0.231	-0.116	-0.1495	-0.0335	0.0144378	0.0475537	0.033116	3.552	3.54	-0.012	-179264	-180446	-1182.24	-179264	-180469	-1205.79	-0.559	-0.498	0.061	93.1265	155.573	157.042	1.10538	7.893	1.74908	-76.455	-76.055	-0.4	-0.304	-0.505	0.201
4-Amino-3,5-dibromo-pyridine	N-Nucleophile	MeCN	11.11	0.75	-5445.37	-5450.82	-5.443	-0.34	-0.243	0.097	0.106	-0.037	-0.143	0.117	0.14	0.023	0.446	0.206	-0.24	-0.117	-0.14	-0.023	0.0153464	0.0475728	0.0322264	3.204	3.831	0.627	-3.41696e+06	-3.42038e+06	-3419.71	-3.41699e+06	-3.42041e+06	-3420.41	-0.802	-0.747	0.055	251.907	185.356	196.772	1.13315	9.478	2.5792	-132.801	-131.97	-0.831	-0.341	-0.475	0.134
N-(phenylmethyl)propan-2-imine (in CH2Cl2)	N-Nucleophile	Dichloromethane	11.13	0.73	-440.794	-443.753	-2.959	-0.328	-0.246	0.082	0.133	-0.016	-0.149	0.0975	0.131	0.0335	0.461	0.23	-0.231	-0.0975	-0.131	-0.0335	0.0103105	0.0373065	0.0269961	3.163	3.167	0.004	-276458	-278323	-1864.91	-276489	-278355	-1865.72	-0.588	-0.52	0.068	147.217	235.735	256.268	1.20842	11.709	2.809	-959.769	-958.05	-1.719	-0.317	-0.45	0.133
Thymine anion	N-Nucleophile	Water	11.17	0.51	-451.148	-453.794	-2.646	-0.282	-0.188	0.094	0.153	0	-0.153	0.0645	0.094	0.0295	0.435	0.188	-0.247	-0.0645	-0.094	-0.0295	0.0047819	0.0235	0.0187181	5.708	5.148	-0.56	-283026	-284692	-1665.21	-283051	-284717	-1665.9	-0.806	-0.65	0.156	125.105	161.423	162.731	1.12006	8.781	2.01798	-76.455	-76.055	-0.4	-0.304	-0.505	0.201
1-Phenyl-imidazole	N-Nucleophile	MeCN	11.31	0.67	-454.468	-457.388	-2.92	-0.325	-0.24	0.085	0.115	-0.032	-0.147	0.105	0.136	0.031	0.44	0.208	-0.232	-0.105	-0.136	-0.031	0.0125284	0.0444615	0.0319331	5.105	4.941	-0.164	-285076	-286915	-1838.45	-285103	-286942	-1839.06	-0.596	-0.533	0.063	144.173	201.948	216.182	1.15953	10.814	2.43059	-132.801	-131.97	-0.831	-0.341	-0.475	0.134
4-Nitro-imidazole anion	N-Nucleophile	Water	11.37	0.53	-427.931	-430.375	-2.444	-0.302	-0.217	0.085	0.095	-0.062	-0.157	0.1035	0.1395	0.036	0.397	0.155	-0.242	-0.1035	-0.1395	-0.036	0.0134915	0.062775	0.0492835	1.376	1.387	0.011	-268485	-270022	-1537.15	-268508	-270046	-1537.56	-0.658	-0.585	0.073	112.067	135.481	127.577	1.10565	8.138	1.84498	-76.455	-76.055	-0.4	-0.304	-0.505	0.201
Ammonia	N-Nucleophile	MeCN	11.39	0.69	-56.216	-56.581	-0.365	-0.43	-0.267	0.163	0.164	0.045	-0.119	0.133	0.111	-0.022	0.594	0.312	-0.282	-0.133	-0.111	0.022	0.0148897	0.0197452	0.00485546	1.994	1.996	0.002	-35250.7	-35481.4	-230.733	-35264.4	-35495.1	-230.765	-1.024	-1.043	-0.019	17.0305	61.1713	43.8261	1.01777	4.019	0.4226	-132.801	-131.97	-0.831	-0.341	-0.475	0.134
tert-Butyl hydrazinecarboxylate	N-Nucleophile	MeCN	11.4	0.7	-455.082	-457.85	-2.768	-0.411	-0.268	0.143	0.155	0.04	-0.115	0.128	0.114	-0.014	0.566	0.308	-0.258	-0.128	-0.114	0.014	0.0144735	0.0210974	0.0066239	2.248	1.932	-0.316	-285441	-287185	-1744.29	-285470	-287215	-1745.12	-0.519	-0.469	0.05	132.161	199.12	212.023	1.1582	9.608	2.20097	-132.801	-131.97	-0.831	-0.341	-0.475	0.134
Hydroxylamine	N-Nucleophile	Water	11.41	0.55	-131.035	-131.763	-0.728	-0.422	-0.264	0.158	0.171	0.048	-0.123	0.1255	0.108	-0.0175	0.593	0.312	-0.281	-0.1255	-0.108	0.0175	0.0132801	0.0186923	0.00541216	0.809	0.748	-0.061	-82195.4	-82654.8	-459.452	-82212	-82671.6	-459.567	-0.489	-0.525	-0.036	33.0299	73.8699	56.2368	1.04082	4.959	0.804377	-76.455	-76.055	-0.4	-0.304	-0.505	0.201
1-(Trimethylsilyl)-imidazole	N-Nucleophile	MeCN	11.43	0.79	-632.18	-635.048	-2.868	-0.325	-0.235	0.09	0.14	0.015	-0.125	0.0925	0.11	0.0175	0.465	0.25	-0.215	-0.0925	-0.11	-0.0175	0.00920027	0.0242	0.0149997	5.626	5.811	0.185	-396577	-398383	-1806.29	-396607	-398414	-1807.1	-0.609	-0.548	0.061	140.258	213.034	237.298	1.1495	9.56	2.18245	-132.801	-131.97	-0.831	-0.341	-0.475	0.134
4-Methoxypyridine	N-Nucleophile	Water	11.44	0.68	-360.667	-362.903	-2.236	-0.355	-0.272	0.083	0.119	-0.033	-0.152	0.118	0.1525	0.0345	0.474	0.239	-0.235	-0.118	-0.1525	-0.0345	0.0146878	0.0486532	0.0339655	3.38	3.32	-0.06	-226236	-227645	-1408.9	-226260	-227669	-1409.34	-0.562	-0.498	0.064	109.126	167.243	169.599	1.1289	8.618	1.94639	-76.455	-76.055	-0.4	-0.304	-0.505	0.201
Imidazole	N-Nucleophile	MeCN	11.47	0.79	-224.881	-226.287	-1.406	-0.327	-0.238	0.089	0.165	0.02	-0.145	0.081	0.109	0.028	0.492	0.258	-0.234	-0.081	-0.109	-0.028	0.00666768	0.0230252	0.0163575	4.889	4.787	-0.102	-141064	-141950	-885.483	-141084	-141969	-885.663	-0.588	-0.53	0.058	68.0772	115.407	105.563	1.06859	6.613	1.24565	-132.801	-131.97	-0.831	-0.341	-0.475	0.134
3-Methylpyridine	N-Nucleophile	MeCN	11.5	0.8	-285.802	-287.68	-1.878	-0.34	-0.262	0.078	0.112	-0.035	-0.147	0.114	0.1485	0.0345	0.452	0.227	-0.225	-0.114	-0.1485	-0.0345	0.0143761	0.0485732	0.0341971	3.242	3.22	-0.022	-179262	-180445	-1183.42	-179285	-180468	-1183.77	-0.533	-0.484	0.049	93.1265	155.592	157.027	1.10559	8.241	1.74343	-132.801	-131.97	-0.831	-0.341	-0.475	0.134
2,4-Dimethyl-imidazole	N-Nucleophile	MeCN	11.51	0.84	-263.933	-265.619	-1.686	-0.318	-0.229	0.089	0.159	0.022	-0.137	0.0795	0.1035	0.024	0.477	0.251	-0.226	-0.0795	-0.1035	-0.024	0.006625	0.0213391	0.0147141	4.88	4.766	-0.114	-165551	-166613	-1062.26	-165573	-166635	-1062.53	-0.441	-0.541	-0.1	82.1038	140.224	134.401	1.10529	7.759	1.54451	-132.801	-131.97	-0.831	-0.341	-0.475	0.134
Benzotriazole anion	N-Nucleophile	Water	11.52	0.67	-393.035	-395.496	-2.461	-0.285	-0.204	0.081	0.126	-0.016	-0.142	0.0795	0.11	0.0305	0.411	0.188	-0.223	-0.0795	-0.11	-0.0305	0.00768887	0.0321809	0.024492	8.922	8.521	-0.401	-246567	-248115	-1548.62	-246589	-248138	-1549.04	-0.452	-0.411	0.041	118.116	155.372	157.726	1.10077	8.272	1.88564	-76.455	-76.055	-0.4	-0.304	-0.505	0.201
Imidazole	N-Nucleophile	DMSO	11.58	0.79	-224.882	-226.287	-1.405	-0.327	-0.239	0.088	0.165	0.02	-0.145	0.081	0.1095	0.0285	0.492	0.259	-0.233	-0.081	-0.1095	-0.0285	0.00666768	0.0231472	0.0164795	4.9	4.8	-0.1	-141064	-141950	-885.474	-141084	-141969	-885.653	-0.588	-0.53	0.058	68.0773	115.407	105.564	1.06859	6.613	1.24565	-553.272	-551.617	-1.655	-0.237	-0.369	0.132
4-Methyl-quinoline	N-Nucleophile	MeCN	11.6	0.62	-438.486	-441.36	-2.874	-0.316	-0.241	0.075	0.077	-0.063	-0.14	0.1195	0.152	0.0325	0.393	0.178	-0.215	-0.1195	-0.152	-0.0325	0.0181683	0.0648989	0.0467306	3.564	3.503	-0.061	-275040	-276850	-1809.9	-275066	-276876	-1810.56	-0.551	-0.49	0.061	143.185	202.876	222.072	1.14417	9.695	2.2161	-132.801	-131.97	-0.831	-0.341	-0.475	0.134
Nicotine	N-Nucleophile	MeCN	11.6	0.81	-495.836	-499.115	-3.279	-0.341	-0.226	0.115	0.111	-0.036	-0.147	0.115	0.131	0.016	0.452	0.19	-0.262	-0.115	-0.131	-0.016	0.0146294	0.0451605	0.0305311	3.071	3.134	0.063	-310984	-313051	-2067.14	-311014	-313081	-2067.71	-0.536	-0.484	0.052	162.232	233.804	266.573	1.16743	10.707	2.51447	-132.801	-131.97	-0.831	-0.341	-0.475	0.134
Guanine anion	N-Nucleophile	Water	11.63	0.59	-539.064	-542.237	-3.173	-0.268	-0.184	0.084	0.162	0.011	-0.151	0.053	0.0865	0.0335	0.43	0.195	-0.235	-0.053	-0.0865	-0.0335	0.00326628	0.0191853	0.015919	10.919	10.551	-0.368	-338192	-340189	-1996.76	-338217	-340215	-1997.39	-0.72	-0.634	0.086	150.118	174.134	177.239	1.14139	9.803	2.17058	-76.455	-76.055	-0.4	-0.304	-0.505	0.201
4-Chloropyridine	N-Nucleophile	Dichloromethane	11.7	0.67	-705.676	-707.972	-2.296	-0.363	-0.278	0.085	0.101	-0.046	-0.147	0.131	0.162	0.031	0.464	0.232	-0.232	-0.131	-0.162	-0.031	0.0184925	0.0565603	0.0380679	0.475	0.624	0.149	-442761	-444206	-1444.48	-442784	-444229	-1444.84	-0.533	-0.478	0.055	113.545	148.87	147.568	1.10256	7.292	1.90237	-959.769	-958.05	-1.719	-0.317	-0.45	0.133
1,1-Dimethylhydrazine	N-Nucleophile	MeCN	11.72	0.73	-189.289	-190.543	-1.254	-0.337	-0.202	0.135	0.156	0.039	-0.117	0.0905	0.0815	-0.009	0.493	0.241	-0.252	-0.0905	-0.0815	0.009	0.00830654	0.0137806	0.00547406	0.633	0.769	0.136	-118704	-119495	-791.632	-118725	-119517	-791.842	-0.67	-0.683	-0.013	60.0983	126.396	120.681	1.07044	6.579	1.33423	-132.801	-131.97	-0.831	-0.341	-0.475	0.134
2-Methyl-imidazole	N-Nucleophile	MeCN	11.74	0.76	-263.933	-265.619	-1.686	-0.318	-0.229	0.089	0.159	0.022	-0.137	0.0795	0.1035	0.024	0.477	0.251	-0.226	-0.0795	-0.1035	-0.024	0.006625	0.0213391	0.0147141	4.88	4.766	-0.114	-165551	-166613	-1062.26	-165573	-166635	-1062.52	-0.603	-0.541	0.062	82.1038	140.225	134.432	1.10513	7.759	1.54452	-132.801	-131.97	-0.831	-0.341	-0.475	0.134
4-Methyl-imidazole	N-Nucleophile	MeCN	11.79	0.77	-263.931	-265.618	-1.687	-0.318	-0.229	0.089	0.166	0.023	-0.143	0.076	0.103	0.027	0.484	0.252	-0.232	-0.076	-0.103	-0.027	0.00596694	0.0210496	0.0150827	4.532	4.449	-0.083	-165549	-166612	-1062.77	-165570	-166634	-1063.19	-0.588	-0.53	0.058	82.1038	140.22	134.406	1.10523	7.753	1.55735	-132.801	-131.97	-0.831	-0.341	-0.475	0.134
1-Methyl-imidazole	N-Nucleophile	MeCN	11.9	0.73	-263.919	-265.606	-1.687	-0.324	-0.236	0.088	0.16	0.017	-0.143	0.082	0.1095	0.0275	0.484	0.253	-0.231	-0.082	-0.1095	-0.0275	0.00694628	0.0236961	0.0167499	5.349	5.242	-0.107	-165541	-166604	-1062.82	-165563	-166626	-1063.07	-0.613	-0.549	0.064	82.1038	139.069	134.458	1.09588	7.716	1.53691	-132.801	-131.97	-0.831	-0.341	-0.475	0.134
Isopropylamine	N-Nucleophile	Water	12	0.6	-173.341	-174.548	-1.207	-0.39	-0.243	0.147	0.155	0.039	-0.116	0.1175	0.102	-0.0155	0.545	0.282	-0.263	-0.1175	-0.102	0.0155	0.0126663	0.0184468	0.00578052	1.787	1.758	-0.029	-108689	-109451	-762.174	-108710	-109473	-762.479	-0.871	-0.867	0.004	59.1103	132.37	129.216	1.07111	6.728	1.40708	-76.455	-76.055	-0.4	-0.304	-0.505	0.201
Methyl glycinate	N-Nucleophile	Water	12.08	0.6	-321.955	-323.835	-1.88	-0.404	-0.251	0.153	0.159	0.002	-0.157	0.1225	0.1245	0.002	0.563	0.253	-0.31	-0.1225	-0.1245	-0.002	0.013327	0.0306329	0.0173059	3.412	3.035	-0.377	-201952	-203137	-1184.45	-201977	-203162	-1185.01	-0.845	-0.844	0.001	89.0932	147.067	140.166	1.12722	8.794	1.77983	-76.455	-76.055	-0.4	-0.304	-0.505	0.201
Guanosine anion	N-Nucleophile	Water	12.09	0.52	-1032.63	-1038.59	-5.966	-0.274	-0.185	0.089	0.155	0.009	-0.146	0.0595	0.088	0.0285	0.429	0.194	-0.235	-0.0595	-0.088	-0.0285	0.00412617	0.0199588	0.0158326	26.173	26.053	-0.12	-647807	-651563	-3755.74	-647848	-651604	-3756.21	-0.822	-0.704	0.118	282.233	301.876	340.399	1.28064	12.421	3.41801	-76.455	-76.055	-0.4	-0.304	-0.505	0.201
Thiocyanate	N-Nucleophile	MeCN	12.13	0.6	-490.012	-491.249	-1.237	-0.318	-0.211	0.107	0.194	0.073	-0.121	0.062	0.069	0.007	0.512	0.284	-0.228	-0.062	-0.069	-0.007	0.00375391	0.00838204	0.00462814	0.995	1.413	0.418	-307479	-308256	-776.817	-307495	-308272	-776.877	-0.616	-0.577	0.039	58.0824	86.9452	70.9619	1.0491	6.194	1.21035	-132.801	-131.97	-0.831	-0.341	-0.475	0.134
2,2,2-Trifluoroethylamine	N-Nucleophile	DMSO	12.15	0.65	-430.968	-433.038	-2.07	-0.417	-0.262	0.155	0.163	0.041	-0.122	0.127	0.1105	-0.0165	0.58	0.303	-0.277	-0.127	-0.1105	0.0165	0.0139043	0.0201489	0.00624462	4.101	3.898	-0.203	-270385	-271687	-1302.67	-270407	-271711	-1303.13	-0.853	-0.847	0.006	99.0551	120.535	110.041	1.08559	7.043	1.52981	-553.272	-551.617	-1.655	-0.237	-0.369	0.132
4-Aminopyridine	N-Nucleophile	Water	12.19	0.66	-301.813	-303.735	-1.922	-0.331	-0.231	0.1	0.131	-0.016	-0.147	0.1	0.1235	0.0235	0.462	0.215	-0.247	-0.1	-0.1235	-0.0235	0.0108225	0.0354703	0.0246478	4.867	5.472	0.605	-189316	-190527	-1210.67	-189338	-190549	-1211.08	-0.815	-0.539	0.276	94.1145	148.086	147.262	1.09827	7.801	1.71997	-76.455	-76.055	-0.4	-0.304	-0.505	0.201
Glycylglycylglycine (anionic)	N-Nucleophile	Water	12.26	0.63	-696.199	-700.207	-4.008	-0.374	-0.219	0.155	0.161	0.014	-0.147	0.1065	0.1025	-0.004	0.535	0.233	-0.302	-0.1065	-0.1025	0.004	0.0106002	0.0225456	0.0119454	19.646	17.525	-2.121	-436742	-439266	-2523.82	-436778	-439303	-2524.99	-0.693	-0.616	0.077	188.161	239.205	250.2	1.24595	14.332	3.52031	-76.455	-76.055	-0.4	-0.304	-0.505	0.201
Glycineamide	N-Nucleophile	Water	12.29	0.58	-170.938	-172.054	-1.116	-0.391	-0.254	0.137	0.153	0.02	-0.133	0.119	0.117	-0.002	0.544	0.274	-0.27	-0.119	-0.117	0.002	0.0130156	0.0249799	0.0119643	2.185	2.173	-0.012	-107212	-107915	-703.663	-107232	-107936	-704.016	-0.836	-0.833	0.003	55.0785	119.996	106.986	1.10121	7.844	1.50274	-76.455	-76.055	-0.4	-0.304	-0.505	0.201
Propargylamine	N-Nucleophile	Water	12.29	0.59	-263.089	-264.653	-1.564	-0.398	-0.245	0.153	0.158	0.017	-0.141	0.12	0.114	-0.006	0.556	0.262	-0.294	-0.12	-0.114	0.006	0.0129496	0.0248015	0.0118519	5.444	4.996	-0.448	-165025	-166011	-985.671	-165047	-166033	-985.754	-0.845	-0.787	0.058	74.0818	126.529	118.018	1.08762	7.71	1.5405	-76.455	-76.055	-0.4	-0.304	-0.505	0.201
2-Phenyl-4,5-dihydro-1H-imidazole	N-Nucleophile	Dichloromethane	12.31	0.77	-455.641	-458.597	-2.956	-0.329	-0.226	0.103	0.099	-0.043	-0.142	0.115	0.1345	0.0195	0.428	0.183	-0.245	-0.115	-0.1345	-0.0195	0.0154498	0.0494269	0.0339771	3.281	3.236	-0.045	-285796	-287658	-1862.36	-285823	-287686	-1862.99	-0.714	-0.653	0.061	146.189	211.575	228.27	1.17153	10.704	2.47955	-959.769	-958.05	-1.719	-0.317	-0.45	0.133
tert-Butylamine	N-Nucleophile	MeCN	12.35	0.72	-212.387	-213.875	-1.488	-0.388	-0.243	0.145	0.15	0.034	-0.116	0.119	0.1045	-0.0145	0.538	0.277	-0.261	-0.119	-0.1045	0.0145	0.0131608	0.0197116	0.00655086	1.664	1.621	-0.043	-133172	-134111	-939.495	-133194	-134134	-939.964	-0.877	-0.871	0.006	73.1368	149.097	155.119	1.06811	6.726	1.51386	-132.801	-131.97	-0.831	-0.341	-0.475	0.134
4-Pyrrolidinopyridine	N-Nucleophile	Water	12.39	0.66	-456.805	-459.806	-3.001	-0.306	-0.212	0.094	0.133	-0.013	-0.146	0.0865	0.1125	0.026	0.439	0.199	-0.24	-0.0865	-0.1125	-0.026	0.00852192	0.0317996	0.0232777	6.347	6.885	0.538	-286511	-288402	-1891.62	-286538	-288430	-1892.12	-0.622	-0.547	0.075	148.205	213.733	238.126	1.1506	10.251	2.48135	-76.455	-76.055	-0.4	-0.304	-0.505	0.201
Trimethylhydrazine	N-Nucleophile	MeCN	12.43	0.75	-228.33	-229.864	-1.534	-0.368	-0.23	0.138	0.158	0.042	-0.116	0.105	0.094	-0.011	0.526	0.272	-0.254	-0.105	-0.094	0.011	0.01048	0.0162426	0.00576261	1.889	1.81	-0.079	-143183	-144152	-968.715	-143206	-144175	-969.056	-0.512	-0.502	0.01	74.1249	149.593	149.26	1.09952	7.711	1.5867	-132.801	-131.97	-0.831	-0.341	-0.475	0.134
1,3-Dimethylimidazolidin-2-imine	N-Nucleophile	Dichloromethane	12.46	0.87	-359.178	-362.505	-3.327	-0.343	-0.22	0.123	0.156	0.042	-0.114	0.0935	0.089	-0.0045	0.499	0.262	-0.237	-0.0935	-0.089	0.0045	0.00875977	0.0151164	0.00635664	4.677	4.371	-0.306	-225270	-226737	-1467.43	-225296	-226764	-1468.03	-0.907	-0.831	0.076	113.161	180.513	191.564	1.12346	8.788	1.87562	-959.769	-958.05	-1.719	-0.317	-0.45	0.133
2-Pyridone anion	N-Nucleophile	Water	12.47	0.52	-321.157	-323.123	-1.966	-0.26	-0.173	0.087	0.15	0.005	-0.145	0.055	0.084	0.029	0.41	0.178	-0.232	-0.055	-0.084	-0.029	0.00368902	0.0198202	0.0161312	8.096	7.225	-0.871	-201472	-202709	-1237.51	-201493	-202731	-1237.89	-0.734	-0.631	0.103	94.0914	137.826	133.882	1.0892	7.889	1.67776	-76.455	-76.055	-0.4	-0.304	-0.505	0.201
Benzohydrazide	N-Nucleophile	MeCN	12.49	0.66	-453.605	-456.405	-2.8	-0.349	-0.264	0.085	0.096	-0.048	-0.144	0.1265	0.156	0.0295	0.445	0.216	-0.229	-0.1265	-0.156	-0.0295	0.0179801	0.0563333	0.0383533	3.695	3.429	-0.266	-284538	-286302	-1763.66	-284565	-286330	-1764.46	-0.501	-0.44	0.061	136.151	191.79	200.762	1.1569	10.332	2.36272	-132.801	-131.97	-0.831	-0.341	-0.475	0.134
Ethanolamine	N-Nucleophile	Water	12.61	0.58	-209.172	-210.456	-1.284	-0.396	-0.246	0.15	0.163	0.044	-0.119	0.1165	0.101	-0.0155	0.559	0.29	-0.269	-0.1165	-0.101	0.0155	0.0121398	0.0175879	0.00544817	1.54	1.487	-0.053	-131188	-131998	-809.567	-131209	-132019	-809.934	-0.861	-0.856	0.005	61.0831	122.32	113.048	1.08205	7.607	1.53517	-76.455	-76.055	-0.4	-0.304	-0.505	0.201
Aniline	N-Nucleophile	MeCN	12.64	0.68	-285.801	-287.678	-1.877	-0.334	-0.254	0.08	0.128	-0.015	-0.143	0.103	0.1345	0.0315	0.462	0.239	-0.223	-0.103	-0.1345	-0.0315	0.0114816	0.0378457	0.0263641	1.736	1.728	-0.008	-179261	-180444	-1182.8	-179283	-180466	-1183.15	-0.866	-0.866	0	93.1265	155.925	156.926	1.10843	8.17	1.75545	-132.801	-131.97	-0.831	-0.341	-0.475	0.134
Threonine (anionic)	N-Nucleophile	Water	12.69	0.6	-435.408	-437.935	-2.527	-0.361	-0.207	0.154	0.166	0.048	-0.118	0.0975	0.0795	-0.018	0.527	0.255	-0.272	-0.0975	-0.0795	0.018	0.00901921	0.0123926	0.00337343	11.458	9.995	-1.463	-273130	-274722	-1591.97	-273158	-274750	-1592.49	-0.867	-0.878	-0.011	118.111	163.118	168.68	1.10505	8.523	1.97496	-76.455	-76.055	-0.4	-0.304	-0.505	0.201
Hydroxylamine	N-Nucleophile	MeCN	12.8	0.63	-131.034	-131.763	-0.729	-0.422	-0.264	0.158	0.171	0.048	-0.123	0.1255	0.108	-0.0175	0.593	0.312	-0.281	-0.1255	-0.108	0.0175	0.0132801	0.0186923	0.00541216	0.807	0.745	-0.062	-82195.2	-82654.7	-459.46	-82211.9	-82671.5	-459.575	-0.489	-0.525	-0.036	33.0299	73.8688	56.2368	1.04081	4.959	0.804346	-132.801	-131.97	-0.831	-0.341	-0.475	0.134
Ethylamine	N-Nucleophile	Water	12.87	0.58	-134.294	-135.22	-0.926	-0.391	-0.242	0.149	0.16	0.044	-0.116	0.1155	0.099	-0.0165	0.551	0.286	-0.265	-0.1155	-0.099	0.0165	0.0121055	0.0171346	0.00502913	1.747	1.715	-0.032	-84205.9	-84790.9	-584.929	-84225.1	-84810.2	-585.115	-0.861	-0.857	0.004	45.0837	112.32	102.088	1.06348	6.592	1.23511	-76.455	-76.055	-0.4	-0.304	-0.505	0.201
Pyridine	N-Nucleophile	Dichloromethane	12.9	0.67	-246.755	-248.351	-1.596	-0.35	-0.267	0.083	0.113	-0.036	-0.149	0.1185	0.1515	0.033	0.463	0.231	-0.232	-0.1185	-0.1515	-0.033	0.0151644	0.0496802	0.0345158	2.84	2.775	-0.065	-154778	-155784	-1005.42	-154799	-155804	-1005.68	-0.538	-0.483	0.055	79.0999	133.206	129.029	1.07891	7.291	1.46796	-959.769	-958.05	-1.719	-0.317	-0.45	0.133
Glycylglycine (anionic)	N-Nucleophile	Water	12.91	0.59	-489.318	-492.129	-2.811	-0.354	-0.217	0.137	0.163	0.025	-0.138	0.0955	0.096	0.0005	0.517	0.242	-0.275	-0.0955	-0.096	-0.0005	0.00882036	0.0190413	0.010221	14.618	11.235	-3.383	-306962	-308733	-1770.35	-306991	-308762	-1770.67	-0.688	-0.618	0.07	131.11	177.206	177.48	1.16047	10.292	2.33591	-76.455	-76.055	-0.4	-0.304	-0.505	0.201
4-Chloroaniline	N-Nucleophile	MeCN	12.92	0.6	-744.724	-747.301	-2.577	-0.336	-0.253	0.083	0.117	-0.027	-0.144	0.1095	0.14	0.0305	0.453	0.226	-0.227	-0.1095	-0.14	-0.0305	0.0132343	0.0433628	0.0301286	3.258	3.135	-0.123	-467245	-468867	-1621.62	-467269	-468891	-1622.08	-0.864	-0.863	0.001	127.572	171.603	175.497	1.13223	9.376	2.20263	-132.801	-131.97	-0.831	-0.341	-0.475	0.134
2-Methyl-4,5-dihydro-1H-imidazole	N-Nucleophile	Dichloromethane	12.92	0.77	-265.091	-266.815	-1.724	-0.345	-0.223	0.122	0.154	0.025	-0.129	0.0955	0.099	0.0035	0.499	0.248	-0.251	-0.0955	-0.099	-0.0035	0.00913853	0.0197601	0.0106216	3.542	3.516	-0.026	-166262	-167348	-1086.57	-166284	-167371	-1086.95	-0.723	-0.662	0.061	84.1197	148.514	146.762	1.10394	7.695	1.59241	-959.769	-958.05	-1.719	-0.317	-0.45	0.133
(R)-2-(tert-Butyl)-3,4-dihydro-2H-benzo[4,5]thiazolo[3,2-a]pyrimidine	N-Nucleophile	Dichloromethane	12.95	0.58	-930.098	-934.262	-4.164	-0.287	-0.205	0.082	0.118	-0.021	-0.139	0.0845	0.113	0.0285	0.405	0.184	-0.221	-0.0845	-0.113	-0.0285	0.00881512	0.0346984	0.0258832	5.078	4.643	-0.435	-583496	-586118	-2621.4	-583527	-586149	-2622.22	-0.686	-0.597	0.089	204.291	252.277	289.749	1.19157	12.514	2.73035	-959.769	-958.05	-1.719	-0.317	-0.45	0.133
Arginine (betaine)	N-Nucleophile	Water	12.96	0.57	-603.084	-606.732	-3.648	-0.36	-0.21	0.15	0.14	0.003	-0.137	0.11	0.1035	-0.0065	0.5	0.213	-0.287	-0.11	-0.1035	0.0065	0.0121	0.0251461	0.0130461	33.362	32.253	-1.109	-378283	-380582	-2298.92	-378319	-380619	-2300.24	-0.649	-0.575	0.074	174.201	240.675	262.178	1.21513	12.627	3.31801	-76.455	-76.055	-0.4	-0.304	-0.505	0.201
3-Bromo-4-(dimethylamino)pyridine	N-Nucleophile	MeCN	12.96	0.67	-2951.65	-2955.89	-4.24	-0.341	-0.234	0.107	0.108	-0.046	-0.154	0.1165	0.14	0.0235	0.449	0.188	-0.261	-0.1165	-0.14	-0.0235	0.0151139	0.0521277	0.0370138	4.359	3.885	-0.474	-1.85208e+06	-1.85475e+06	-2667.48	-1.85211e+06	-1.85478e+06	-2667.18	-0.548	-0.467	0.081	201.064	209.751	229.337	1.15783	8.798	2.22301	-132.801	-131.97	-0.831	-0.341	-0.475	0.134
2,3,5,6-Tetrahydroimidazo[2,1-b]thiazole	N-Nucleophile	Dichloromethane	12.98	0.81	-700.49	-703.132	-2.642	-0.339	-0.226	0.113	0.142	0.002	-0.14	0.0985	0.112	0.0135	0.481	0.228	-0.253	-0.0985	-0.112	-0.0135	0.0100855	0.0275088	0.0174233	5.684	5.438	-0.246	-439471	-441135	-1663.96	-439495	-441160	-1664.42	-0.655	-0.578	0.077	128.195	172.354	182.882	1.10636	8.617	1.8642	-959.769	-958.05	-1.719	-0.317	-0.45	0.133
Aniline	N-Nucleophile	Water	12.99	0.73	-285.808	-287.689	-1.881	-0.3	-0.212	0.088	0.13	-0.011	-0.141	0.085	0.1115	0.0265	0.43	0.201	-0.229	-0.085	-0.1115	-0.0265	0.00840116	0.030926	0.0225248	1.846	2.208	0.362	-179265	-180450	-1184.55	-179287	-180472	-1184.89	-0.828	-0.79	0.038	93.1265	154.722	156.265	1.10297	8.211	1.74898	-76.455	-76.055	-0.4	-0.304	-0.505	0.201
Diethanolamine	N-Nucleophile	Water	13	0.61	-362.127	-364.33	-2.203	-0.373	-0.234	0.139	0.162	0.04	-0.122	0.1055	0.097	-0.0085	0.535	0.274	-0.261	-0.1055	-0.097	0.0085	0.0104021	0.0171697	0.00676761	2.261	2.162	-0.099	-227126	-228515	-1389.73	-227152	-228542	-1390.27	-0.727	-0.693	0.034	105.136	174.549	179.564	1.13421	9.195	2.29253	-76.455	-76.055	-0.4	-0.304	-0.505	0.201
p-Toluidine	N-Nucleophile	Water	13	0.79	-324.853	-327.015	-2.162	-0.292	-0.206	0.086	0.129	-0.01	-0.139	0.0815	0.108	0.0265	0.421	0.196	-0.225	-0.0815	-0.108	-0.0265	0.00788866	0.0297551	0.0218664	1.586	1.814	0.228	-203747	-205109	-1362.4	-203772	-205135	-1362.7	-0.83	-0.794	0.036	107.153	177.151	184.326	1.13121	9.223	2.02637	-76.455	-76.055	-0.4	-0.304	-0.505	0.201
3,5,6,7-Tetrahydro-2H-imidazo[2,1-b][1,3]thiazine	N-Nucleophile	Dichloromethane	13	0.83	-739.535	-742.459	-2.924	-0.332	-0.219	0.113	0.143	0.004	-0.139	0.0945	0.1075	0.013	0.475	0.223	-0.252	-0.0945	-0.1075	-0.013	0.00940026	0.0259109	0.0165106	6.119	5.917	-0.202	-463953	-465794	-1841.65	-463978	-465821	-1842.17	-0.655	-0.58	0.075	142.222	189.638	208.706	1.1147	9.101	2.01833	-959.769	-958.05	-1.719	-0.317	-0.45	0.133
Alanine (anionic)	N-Nucleophile	Water	13.01	0.58	-321.485	-323.374	-1.889	-0.361	-0.205	0.156	0.169	0.05	-0.119	0.096	0.0775	-0.0185	0.53	0.255	-0.275	-0.096	-0.0775	0.0185	0.00869434	0.011777	0.00308262	7.809	6.687	-1.122	-201667	-202856	-1189.25	-201691	-202880	-1189.39	-0.879	-0.886	-0.007	88.0852	135.503	131.315	1.08474	7.223	1.64616	-76.455	-76.055	-0.4	-0.304	-0.505	0.201
Asparagine (anionic)	N-Nucleophile	Water	13.03	0.53	-489.328	-492.134	-2.806	-0.365	-0.21	0.155	0.169	0.03	-0.139	0.098	0.09	-0.008	0.534	0.24	-0.294	-0.098	-0.09	0.008	0.00899251	0.016875	0.00788249	8.842	7.743	-1.099	-306969	-308736	-1766.61	-306998	-308765	-1766.74	-0.849	-0.796	0.053	131.11	170.112	175.056	1.12428	8.766	2.11836	-76.455	-76.055	-0.4	-0.304	-0.505	0.201
1-Benzyl-2-phenyl-4,5-dihydro-1H-imidazole	N-Nucleophile	Dichloromethane	13.11	0.83	-724.267	-729.017	-4.75	-0.33	-0.22	0.11	0.108	-0.037	-0.145	0.111	0.1285	0.0175	0.438	0.183	-0.255	-0.111	-0.1285	-0.0175	0.0140651	0.0451154	0.0310504	3.081	2.979	-0.102	-454285	-457277	-2992.41	-454321	-457315	-2993.27	-0.618	-0.545	0.073	236.312	312.142	365.339	1.26321	13.388	3.29359	-959.769	-958.05	-1.719	-0.317	-0.45	0.133
2-Methyl-4,5-dihydro-3H-pyrrole	N-Nucleophile	Dichloromethane	13.12	0.69	-249.086	-250.766	-1.68	-0.389	-0.26	0.129	0.153	0.005	-0.148	0.118	0.1275	0.0095	0.542	0.265	-0.277	-0.118	-0.1275	-0.0095	0.012845	0.0306722	0.0178272	2.82	2.609	-0.211	-156211	-157270	-1059.55	-156233	-157293	-1059.94	-0.568	-0.5	0.068	83.1317	154.075	155.628	1.10136	7.802	1.63933	-959.769	-958.05	-1.719	-0.317	-0.45	0.133
Serine (anionic)	N-Nucleophile	Water	13.16	0.55	-396.365	-398.612	-2.247	-0.366	-0.21	0.156	0.168	0.047	-0.121	0.099	0.0815	-0.0175	0.534	0.257	-0.277	-0.099	-0.0815	0.0175	0.00917697	0.0129227	0.0037457	9.875	8.983	-0.892	-248650	-250065	-1414.88	-248676	-250091	-1415.01	-0.876	-0.879	-0.003	104.085	143.513	141.559	1.09275	7.885	1.86894	-76.455	-76.055	-0.4	-0.304	-0.505	0.201
Methionine (anionic)	N-Nucleophile	Water	13.16	0.58	-797.108	-800.237	-3.129	-0.337	-0.197	0.14	0.154	0.024	-0.13	0.0915	0.0865	-0.005	0.491	0.221	-0.27	-0.0915	-0.0865	0.005	0.00852571	0.0169282	0.00840245	14.456	13.983	-0.473	-500083	-502053	-1970.27	-500114	-502085	-1970.6	-0.874	-0.876	-0.002	148.203	202.37	215.656	1.16384	11.338	2.73118	-76.455	-76.055	-0.4	-0.304	-0.505	0.201
4-(Dimethylamino)pyridine	N-Nucleophile	Water	13.19	0.56	-379.875	-382.363	-2.488	-0.311	-0.215	0.096	0.132	-0.014	-0.146	0.0895	0.1145	0.025	0.443	0.201	-0.242	-0.0895	-0.1145	-0.025	0.00904091	0.0326126	0.0235716	5.75	6.36	0.61	-238262	-239829	-1567.32	-238288	-239856	-1568.12	-0.614	-0.544	0.07	122.168	187.534	201.009	1.13029	9.046	2.12505	-76.455	-76.055	-0.4	-0.304	-0.505	0.201
p-Toluidine	N-Nucleophile	MeCN	13.19	0.69	-324.853	-327.015	-2.162	-0.292	-0.205	0.087	0.129	-0.01	-0.139	0.0815	0.1075	0.026	0.421	0.195	-0.226	-0.0815	-0.1075	-0.026	0.00788866	0.0296314	0.0217428	1.577	1.806	0.229	-203747	-205109	-1361.82	-203771	-205135	-1364.22	-0.829	-0.794	0.035	107.153	177.153	184.326	1.13122	9.228	2.02634	-132.801	-131.97	-0.831	-0.341	-0.475	0.134
Allylamine	N-Nucleophile	Water	13.21	0.54	-172.144	-173.306	-1.162	-0.369	-0.245	0.124	0.154	0.004	-0.15	0.1075	0.1205	0.013	0.523	0.249	-0.274	-0.1075	-0.1205	-0.013	0.011048	0.0291571	0.0181091	1.942	1.901	-0.041	-107953	-108686	-733.154	-107974	-108707	-733.402	-0.852	-0.848	0.004	57.0944	127.283	118.517	1.09103	7.728	1.52443	-76.455	-76.055	-0.4	-0.304	-0.505	0.201
4-Acetamido-pyridine	N-Nucleophile	MeCN	13.24	0.67	-453.63	-456.43	-2.8	-0.355	-0.254	0.101	0.107	-0.043	-0.15	0.124	0.1485	0.0245	0.462	0.211	-0.251	-0.124	-0.1485	-0.0245	0.0166407	0.0522565	0.0356158	1.281	0.712	-0.569	-284555	-286318	-1762.98	-284582	-286346	-1763.34	-0.703	-0.611	0.092	136.151	189.067	199.874	1.14385	9.777	2.39116	-132.801	-131.97	-0.831	-0.341	-0.475	0.134
Di(methoxyethyl)amine	N-Nucleophile	MeCN	13.24	0.93	-440.187	-442.953	-2.766	-0.373	-0.234	0.139	0.159	0.043	-0.116	0.107	0.0955	-0.0115	0.532	0.277	-0.255	-0.107	-0.0955	0.0115	0.0107603	0.0164625	0.00570221	1.657	1.426	-0.231	-276070	-277815	-1745.18	-276101	-277847	-1745.68	-0.727	-0.693	0.034	133.189	225.052	238.245	1.21112	11.583	2.7922	-132.801	-131.97	-0.831	-0.341	-0.475	0.134
Beta-alanine (anionic)	N-Nucleophile	Water	13.26	0.58	-321.483	-323.369	-1.886	-0.364	-0.2	0.164	0.169	0.052	-0.117	0.0975	0.074	-0.0235	0.533	0.252	-0.281	-0.0975	-0.074	0.0235	0.00891768	0.0108651	0.0019474	9.703	9.134	-0.569	-201665	-202853	-1187.73	-201689	-202877	-1188.41	-0.861	-0.859	0.002	88.0852	138.423	132.753	1.1001	8.412	1.90118	-76.455	-76.055	-0.4	-0.304	-0.505	0.201
Ethylenediamine	N-Nucleophile	Water	13.28	0.58	-189.336	-190.584	-1.248	-0.389	-0.24	0.149	0.163	0.045	-0.118	0.113	0.0975	-0.0155	0.552	0.285	-0.267	-0.113	-0.0975	0.0155	0.0115661	0.0166776	0.00511151	2.585	2.548	-0.037	-118732	-119520	-787.738	-118753	-119541	-788.087	-0.86	-0.856	0.004	60.0983	128.054	120.811	1.08371	7.725	1.56582	-76.455	-76.055	-0.4	-0.304	-0.505	0.201
n-Propylamine	N-Nucleophile	Water	13.33	0.56	-173.338	-174.545	-1.207	-0.391	-0.242	0.149	0.162	0.046	-0.116	0.1145	0.098	-0.0165	0.553	0.288	-0.265	-0.1145	-0.098	0.0165	0.0118538	0.0166736	0.00481986	1.694	1.659	-0.035	-108687	-109449	-761.842	-108708	-109470	-762.113	-0.858	-0.855	0.003	59.1103	134.696	130.023	1.08542	7.885	1.60099	-76.455	-76.055	-0.4	-0.304	-0.505	0.201
2-Phenylethylamine	N-Nucleophile	Water	13.4	0.57	-363.89	-366.327	-2.437	-0.33	-0.244	0.086	0.13	-0.013	-0.143	0.1	0.1285	0.0285	0.46	0.231	-0.229	-0.1	-0.1285	-0.0285	0.0108696	0.0357408	0.0248712	1.697	1.691	-0.006	-228222	-229759	-1536.43	-228249	-229786	-1536.9	-0.858	-0.854	0.004	121.18	199.231	212.71	1.15635	10.554	2.38382	-76.455	-76.055	-0.4	-0.304	-0.505	0.201
4-Methoxyaniline	N-Nucleophile	MeCN	13.42	0.73	-399.715	-402.237	-2.522	-0.295	-0.207	0.088	0.125	-0.015	-0.14	0.085	0.111	0.026	0.42	0.192	-0.228	-0.085	-0.111	-0.026	0.00860119	0.0320859	0.0234847	1.533	2.177	0.644	-250720	-252309	-1588.86	-250746	-252336	-1590.01	-0.829	-0.793	0.036	123.152	188.666	196.809	1.15324	10.312	2.22287	-132.801	-131.97	-0.831	-0.341	-0.475	0.134
2,3-Dihydrobenzo[d]imidazo[2,1-b]thiazole	N-Nucleophile	Dichloromethane	13.42	0.73	-851.997	-855.599	-3.602	-0.29	-0.204	0.086	0.116	-0.022	-0.138	0.087	0.113	0.026	0.406	0.182	-0.224	-0.087	-0.113	-0.026	0.00932143	0.0350797	0.0257582	4.728	4.217	-0.511	-534527	-536793	-2266.44	-534554	-536822	-2267.43	-0.651	-0.57	0.081	176.238	214.886	237.673	1.15827	10.702	2.38237	-959.769	-958.05	-1.719	-0.317	-0.45	0.133
Benzylamine	N-Nucleophile	Water	13.44	0.55	-324.844	-327.002	-2.158	-0.331	-0.242	0.089	0.127	-0.012	-0.139	0.102	0.127	0.025	0.458	0.23	-0.228	-0.102	-0.127	-0.025	0.0113581	0.035063	0.023705	1.852	1.989	0.137	-203741	-205100	-1359.82	-203766	-205126	-1360.07	-0.85	-0.851	-0.001	107.153	177.019	184.402	1.13006	9.522	2.03321	-76.455	-76.055	-0.4	-0.304	-0.505	0.201
Glutamine (anionic)	N-Nucleophile	Water	13.45	0.54	-528.371	-531.458	-3.087	-0.344	-0.196	0.148	0.164	0.023	-0.141	0.09	0.0865	-0.0035	0.508	0.219	-0.289	-0.09	-0.0865	0.0035	0.00797244	0.0170828	0.00911032	15.913	15.47	-0.443	-331449	-333393	-1943.57	-331481	-333424	-1943.68	-0.849	-0.878	-0.029	145.137	193.206	202.913	1.15719	10.756	2.65938	-76.455	-76.055	-0.4	-0.304	-0.505	0.201
(S)-2-Phenyl-3,4-dihydro-2H-benzo[4,5]thiazolo[3,2-a]pyrimidine	N-Nucleophile	Dichloromethane	13.45	0.72	-1081.59	-1086.71	-5.114	-0.293	-0.208	0.085	0.115	-0.024	-0.139	0.089	0.116	0.027	0.408	0.184	-0.224	-0.089	-0.116	-0.027	0.00970711	0.0365652	0.0268581	4.71	4.173	-0.537	-678544	-681762	-3218.41	-678579	-681798	-3219.65	-0.659	-0.58	0.079	252.334	300.198	347.76	1.25548	14.415	3.43338	-959.769	-958.05	-1.719	-0.317	-0.45	0.133
Hydrazine	N-Nucleophile	Water	13.46	0.57	-111.214	-111.905	-0.691	-0.357	-0.211	0.146	0.167	0.045	-0.122	0.095	0.083	-0.012	0.524	0.256	-0.268	-0.095	-0.083	0.012	0.00861164	0.0134551	0.00484344	0	0	0	-69749.9	-70185.5	-435.582	-69766	-70202.8	-436.811	-0.656	-0.672	-0.016	32.0452	80.7976	64.2926	1.04123	5.199	0.854158	-76.455	-76.055	-0.4	-0.304	-0.505	0.201
N-methyl-glycinenitrile	N-Nucleophile	Water	13.5	0.59	-226.04	-227.474	-1.434	-0.394	-0.249	0.145	0.151	0.009	-0.142	0.1215	0.12	-0.0015	0.545	0.258	-0.287	-0.1215	-0.12	0.0015	0.0135433	0.027907	0.0143636	5.745	5.401	-0.344	-141777	-142681	-903.801	-141799	-142703	-904.104	-0.679	-0.653	0.026	70.0931	133.508	124.995	1.10451	8.256	1.80399	-76.455	-76.055	-0.4	-0.304	-0.505	0.201
Glycine (anionic)	N-Nucleophile	Water	13.51	0.58	-321.474	-323.362	-1.888	-0.353	-0.207	0.146	0.17	0.057	-0.113	0.0915	0.075	-0.0165	0.523	0.264	-0.259	-0.0915	-0.075	0.0165	0.00800406	0.0106534	0.00264935	9.382	8.287	-1.095	-201660	-202849	-1189.15	-201684	-202873	-1189.32	-0.71	-0.691	0.019	88.0852	138.672	132.616	1.10285	8.382	1.84184	-76.455	-76.055	-0.4	-0.304	-0.505	0.201
Gamma-aminobutyric acid (anionic)	N-Nucleophile	Water	13.55	0.56	-360.527	-362.693	-2.166	-0.363	-0.199	0.164	0.166	0.049	-0.117	0.0985	0.075	-0.0235	0.529	0.248	-0.281	-0.0985	-0.075	0.0235	0.00917037	0.0113407	0.00217036	12.847	12.136	-0.711	-226146	-227511	-1364.65	-226171	-227536	-1365.13	-0.858	-0.855	0.003	102.112	160.865	160.74	1.12538	9.672	2.28029	-76.455	-76.055	-0.4	-0.304	-0.505	0.201
1,1,3,3-Tetramethylguanidine	N-Nucleophile	Dichloromethane	13.58	0.77	-360.323	-362.699	-2.376	-0.35	-0.226	0.124	0.151	0.032	-0.119	0.0995	0.097	-0.0025	0.501	0.258	-0.243	-0.0995	-0.097	0.0025	0.00988049	0.0182345	0.00835401	3.464	3.463	-0.001	-225974	-227473	-1499.1	-226001	-227501	-1499.75	-0.86	-0.801	0.059	115.177	192.177	207.787	1.13295	8.866	1.9687	-959.769	-958.05	-1.719	-0.317	-0.45	0.133
Cyanate	N-Nucleophile	MeCN	13.6	0.84	-167.346	-168.266	-0.92	-0.342	-0.203	0.139	0.339	0.159	-0.18	0.0015	0.022	0.0205	0.681	0.362	-0.319	-0.0015	-0.022	-0.0205	1.65198e-06	0.000668508	0.000666856	1.682	1.819	0.137	-105001	-105579	-577.953	-105017	-105595	-578.044	-0.912	-0.839	0.073	42.0168	69.6607	52.0786	1.03309	5.479	1.01668	-132.801	-131.97	-0.831	-0.341	-0.475	0.134
Valine (anionic)	N-Nucleophile	Water	13.65	0.57	-399.571	-402.021	-2.45	-0.34	-0.192	0.148	0.171	0.057	-0.114	0.0845	0.0675	-0.017	0.511	0.249	-0.262	-0.0845	-0.0675	0.017	0.00698655	0.0091491	0.00216255	8.46	7.598	-0.862	-250627	-252171	-1543.95	-250654	-252199	-1544.5	-0.866	-0.874	-0.008	116.138	172.954	184.96	1.10188	7.867	1.97505	-76.455	-76.055	-0.4	-0.304	-0.505	0.201
4-Methylpyridine	N-Nucleophile	Dichloromethane	13.7	0.67	-285.803	-287.681	-1.878	-0.349	-0.265	0.084	0.118	-0.031	-0.149	0.1155	0.148	0.0325	0.467	0.234	-0.233	-0.1155	-0.148	-0.0325	0.0142829	0.0468034	0.0325205	3.417	3.396	-0.021	-179263	-180445	-1182.32	-179285	-180469	-1184.16	-0.552	-0.492	0.06	93.1265	155.566	157.009	1.10548	7.896	1.74894	-959.769	-958.05	-1.719	-0.317	-0.45	0.133
4-Methoxypyridine	N-Nucleophile	Dichloromethane	13.7	0.67	-360.665	-362.902	-2.237	-0.354	-0.27	0.084	0.12	-0.032	-0.152	0.117	0.151	0.034	0.474	0.238	-0.236	-0.117	-0.151	-0.034	0.0144399	0.0479013	0.0334614	3.264	3.2	-0.064	-226236	-227645	-1409.01	-226259	-227668	-1409.46	-0.556	-0.492	0.064	109.126	167.234	169.559	1.12902	8.618	1.94619	-959.769	-958.05	-1.719	-0.317	-0.45	0.133
Isopropylamine	N-Nucleophile	MeCN	13.77	0.7	-173.341	-174.548	-1.207	-0.389	-0.243	0.146	0.155	0.039	-0.116	0.117	0.102	-0.015	0.544	0.282	-0.262	-0.117	-0.102	0.015	0.0125818	0.0184468	0.00586501	1.772	1.743	-0.029	-108689	-109451	-762.178	-108710	-109473	-762.482	-0.871	-0.867	0.004	59.1103	132.37	129.187	1.07127	6.728	1.40702	-132.801	-131.97	-0.831	-0.341	-0.475	0.134
Aspartate (dianionic)	N-Nucleophile	Water	13.81	0.53	-508.673	-511.523	-2.85	-0.343	-0.193	0.15	0.204	0.071	-0.133	0.0695	0.061	-0.0085	0.547	0.264	-0.283	-0.0695	-0.061	0.0085	0.00441522	0.00704735	0.00263213	2.454	1.824	-0.63	-319125	-320918	-1793.19	-319153	-320946	-1793.55	-0.894	-0.904	-0.01	131.087	157.876	160.147	1.1072	8.647	2.22627	-76.455	-76.055	-0.4	-0.304	-0.505	0.201
Histidine (anionic)	N-Nucleophile	Water	13.83	0.54	-545.205	-548.458	-3.253	-0.309	-0.209	0.1	0.171	0.027	-0.144	0.069	0.091	0.022	0.48	0.236	-0.244	-0.069	-0.091	-0.022	0.00495937	0.0175445	0.0125851	12.915	12.104	-0.811	-342015	-344063	-2048.32	-342045	-344094	-2049.04	-0.868	-0.876	-0.008	154.147	196.023	208.744	1.15209	10.357	2.49144	-76.455	-76.055	-0.4	-0.304	-0.505	0.201
Methylamine	N-Nucleophile	Water	13.85	0.53	-95.247	-95.893	-0.646	-0.393	-0.242	0.151	0.162	0.046	-0.116	0.1155	0.098	-0.0175	0.555	0.288	-0.267	-0.1155	-0.098	0.0175	0.0120182	0.0166736	0.00465537	1.744	1.699	-0.045	-59723.1	-60130.8	-407.791	-59740.1	-60148	-407.872	-0.849	-0.845	0.004	31.0571	88.7703	73.7401	1.04405	5.344	0.901634	-76.455	-76.055	-0.4	-0.304	-0.505	0.201
DHPB (3,4-dihydro-2H-benzo[4,5]thiazolo[3,2-a]pyrimidine)	N-Nucleophile	Dichloromethane	13.86	0.78	-891.05	-894.933	-3.883	-0.287	-0.205	0.082	0.118	-0.021	-0.139	0.0845	0.113	0.0285	0.405	0.184	-0.221	-0.0845	-0.113	-0.0285	0.00881512	0.0346984	0.0258832	5.145	4.712	-0.433	-559013	-561457	-2444.34	-559042	-561487	-2445.06	-0.669	-0.582	0.087	190.265	230.97	262.164	1.16617	11.338	2.51912	-959.769	-958.05	-1.719	-0.317	-0.45	0.133
Glutamate (dianionic)	N-Nucleophile	Water	13.96	0.54	-547.716	-550.844	-3.128	-0.35	-0.192	0.158	0.175	0.559	0.384	0.0875	-0.1835	-0.271	0.525	0.751	0.226	-0.0875	0.1835	0.271	0.00729167	0.0224183	0.0151266	7.718	7.196	-0.522	-343605	-345575	-1969.31	-343635	-345606	-1970.17	-0.887	-0.894	-0.007	145.113	181.638	189.056	1.14043	10.285	2.65196	-76.455	-76.055	-0.4	-0.304	-0.505	0.201
N-(1,3-dimethylimidazolidin-2-ylidene)-1-phenylmethanamine	N-Nucleophile	Dichloromethane	14	0.7	-627.795	-631.917	-4.122	-0.325	-0.215	0.11	0.13	-0.012	-0.142	0.0975	0.1135	0.016	0.455	0.203	-0.252	-0.0975	-0.1135	-0.016	0.0104464	0.0317297	0.0212833	4.19	4.051	-0.139	-393753	-396352	-2598.85	-393788	-396388	-2600.11	-0.731	-0.646	0.085	203.283	285.967	329.616	1.23946	12.696	3.19334	-959.769	-958.05	-1.719	-0.317	-0.45	0.133
Leucine (anionic)	N-Nucleophile	Water	14.01	0.52	-438.613	-441.344	-2.731	-0.339	-0.194	0.145	0.166	0.051	-0.115	0.0865	0.0715	-0.015	0.505	0.245	-0.26	-0.0865	-0.0715	0.015	0.00740817	0.0104332	0.00302499	11.502	10.577	-0.925	-275107	-276828	-1721.45	-275136	-276859	-1722.18	-0.868	-0.888	-0.02	130.165	192.808	211.5	1.12333	9.784	2.36103	-76.455	-76.055	-0.4	-0.304	-0.505	0.201
1,3-Diaminopropane	N-Nucleophile	Water	14.02	0.54	-228.38	-229.908	-1.528	-0.391	-0.243	0.148	0.162	0.045	-0.117	0.1145	0.099	-0.0155	0.553	0.288	-0.265	-0.1145	-0.099	0.0155	0.0118538	0.0170156	0.00516187	2.08	1.976	-0.104	-143213	-144178	-964.796	-143236	-144201	-965.177	-0.856	-0.853	0.003	74.1249	150.297	148.727	1.10734	9.008	1.93532	-76.455	-76.055	-0.4	-0.304	-0.505	0.201
N-methylhydroxylamine	N-Nucleophile	MeCN	14.1	0.76	-170.074	-171.084	-1.01	-0.397	-0.248	0.149	0.165	0.046	-0.119	0.116	0.101	-0.015	0.562	0.294	-0.268	-0.116	-0.101	0.015	0.0119715	0.0173486	0.00537711	0.902	0.836	-0.066	-106674	-107311	-637.253	-106692	-107330	-637.498	-0.339	-0.353	-0.014	47.0565	100.089	85.7432	1.06458	6.223	1.14147	-132.801	-131.97	-0.831	-0.341	-0.475	0.134
2,3,4,6,7,8-Hexahydropyrimido[2,1-b][1,3]thiazine	N-Nucleophile	Dichloromethane	14.1	0.82	-778.576	-781.783	-3.207	-0.323	-0.214	0.109	0.15	0.02	-0.13	0.0865	0.097	0.0105	0.473	0.234	-0.239	-0.0865	-0.097	-0.0105	0.00790936	0.0201047	0.0121953	6.661	6.437	-0.224	-488431	-490452	-2020.51	-488459	-490480	-2021.2	-0.71	-0.62	0.09	156.249	207.152	234.113	1.12788	9.747	2.18033	-959.769	-958.05	-1.719	-0.317	-0.45	0.133
Ethanolamine	N-Nucleophile	MeCN	14.11	0.71	-209.172	-210.454	-1.282	-0.395	-0.245	0.15	0.163	0.043	-0.12	0.116	0.101	-0.015	0.558	0.288	-0.27	-0.116	-0.101	0.015	0.0120573	0.0177101	0.00565272	1.514	1.398	-0.116	-131188	-131997	-808.886	-131209	-132018	-809.258	-0.86	-0.852	0.008	61.0831	122.321	113.045	1.08207	7.607	1.5351	-132.801	-131.97	-0.831	-0.341	-0.475	0.134
Phenylalanine (anionic)	N-Nucleophile	Water	14.12	0.53	-551.077	-554.479	-3.402	-0.323	-0.21	0.113	0.135	-0.007	-0.142	0.094	0.1085	0.0145	0.458	0.203	-0.255	-0.094	-0.1085	-0.0145	0.00964629	0.0289957	0.0193494	13.607	13.111	-0.496	-345681	-347823	-2141.98	-345712	-347854	-2142.46	-0.866	-0.876	-0.01	164.181	217.859	239.92	1.16695	10.559	2.67907	-76.455	-76.055	-0.4	-0.304	-0.505	0.201
2-Bz super-dmap	N-Nucleophile	MeCN	14.19	0.67	-1250.45	-1258.29	-7.835	-0.315	-0.217	0.098	0.093	-0.053	-0.146	0.111	0.135	0.024	0.408	0.164	-0.244	-0.111	-0.135	-0.024	0.0150993	0.055564	0.0404648	2.06	2.88	0.82	-784392	-789325	-4933.09	-784439	-789373	-4934.67	-0.543	-0.492	0.051	384.43	419.254	522.765	1.33617	14.609	3.98566	-132.801	-131.97	-0.831	-0.341	-0.475	0.134
4-Methoxyaniline	N-Nucleophile	Water	14.28	0.68	-399.715	-402.237	-2.522	-0.296	-0.208	0.088	0.125	-0.015	-0.14	0.0855	0.1115	0.026	0.421	0.193	-0.228	-0.0855	-0.1115	-0.026	0.00868201	0.0322079	0.0235259	1.541	2.194	0.653	-250720	-252309	-1588.84	-250746	-252337	-1590.06	-0.829	-0.793	0.036	123.152	188.672	196.816	1.15325	10.313	2.22299	-76.455	-76.055	-0.4	-0.304	-0.505	0.201
Benzylamine	N-Nucleophile	MeCN	14.29	0.67	-324.844	-327.002	-2.158	-0.331	-0.242	0.089	0.127	-0.012	-0.139	0.102	0.127	0.025	0.458	0.23	-0.228	-0.102	-0.127	-0.025	0.0113581	0.035063	0.023705	1.842	1.971	0.129	-203740	-205100	-1359.84	-203765	-205125	-1360.16	-0.85	-0.851	-0.001	107.153	177.022	184.399	1.13008	9.522	2.03306	-132.801	-131.97	-0.831	-0.341	-0.475	0.134
Ethyl glycinate	N-Nucleophile	DMSO	14.3	0.67	-361.004	-363.164	-2.16	-0.404	-0.251	0.153	0.157	0.003	-0.154	0.1235	0.124	0.0005	0.561	0.254	-0.307	-0.1235	-0.124	-0.0005	0.0135938	0.0302677	0.0166739	3.531	3.189	-0.342	-226437	-227798	-1361.53	-226463	-227825	-1362.19	-0.845	-0.843	0.002	103.12	171.741	168.809	1.16287	10.113	2.10572	-553.272	-551.617	-1.655	-0.237	-0.369	0.132
2-Benzyl-1,1,3,3-tetramethylguanidine	N-Nucleophile	Dichloromethane	14.36	0.79	-628.941	-633.114	-4.173	-0.326	-0.215	0.111	0.133	-0.01	-0.143	0.0965	0.1125	0.016	0.459	0.205	-0.254	-0.0965	-0.1125	-0.016	0.0101441	0.0308689	0.0207248	3.9	4.226	0.326	-394458	-397089	-2630.8	-394496	-397128	-2631.37	-0.692	-0.626	0.066	205.299	297.643	347.007	1.2466	12.496	3.15195	-959.769	-958.05	-1.719	-0.317	-0.45	0.133
Allylamine	N-Nucleophile	MeCN	14.37	0.66	-172.144	-173.306	-1.162	-0.369	-0.245	0.124	0.155	0.004	-0.151	0.107	0.1205	0.0135	0.524	0.249	-0.275	-0.107	-0.1205	-0.0135	0.0109246	0.0291571	0.0182325	1.929	1.887	-0.042	-107953	-108686	-733.165	-107974	-108707	-733.412	-0.851	-0.848	0.003	57.0944	127.28	118.518	1.09101	7.729	1.52436	-132.801	-131.97	-0.831	-0.341	-0.475	0.134
2-Aminobutan-1-ol	N-Nucleophile	DMSO	14.39	0.67	-287.26	-289.105	-1.845	-0.393	-0.246	0.147	0.161	0.042	-0.119	0.116	0.102	-0.014	0.554	0.288	-0.266	-0.116	-0.102	0.014	0.0121444	0.0180625	0.0059181	1.311	1.368	0.057	-180150	-181314	-1164.59	-180175	-181340	-1165.01	-0.867	-0.862	0.005	89.1362	160.702	166.758	1.09704	7.866	1.79628	-553.272	-551.617	-1.655	-0.237	-0.369	0.132
2-Methyl-1,4,5,6-tetrahydropyrimidine	N-Nucleophile	MeCN	14.43	0.79	-304.138	-306.143	-2.005	-0.34	-0.219	0.121	0.153	0.029	-0.124	0.0935	0.095	0.0015	0.493	0.248	-0.245	-0.0935	-0.095	-0.0015	0.00886638	0.0181956	0.00932919	4.054	4.3	0.246	-190744	-192008	-1264.56	-190768	-192033	-1265.33	-0.719	-0.643	0.076	98.1463	166.511	172.416	1.11168	8.239	1.75769	-132.801	-131.97	-0.831	-0.341	-0.475	0.134
1-Methyl-2,3,4,6,7,8-hexahydro-1H-pyrimido[1,2-a]pyrimidine (MeTBD)	N-Nucleophile	Dichloromethane	14.43	0.81	-475.13	-478.256	-3.126	-0.324	-0.207	0.117	0.152	0.031	-0.121	0.086	0.088	0.002	0.476	0.238	-0.238	-0.086	-0.088	-0.002	0.00776891	0.0162689	0.0085	3.595	3.495	-0.1	-297986	-299958	-1971.63	-298014	-299987	-1972.55	-0.726	-0.644	0.082	153.225	221.982	252.592	1.14893	9.454	2.20061	-959.769	-958.05	-1.719	-0.317	-0.45	0.133
2,3,5,6-Tetrahydro-1H-imidazo[1,2-a]imidazole (TBO)	N-Nucleophile	Dichloromethane	14.44	0.79	-358.004	-360.285	-2.281	-0.334	-0.215	0.119	0.156	0.042	-0.114	0.089	0.0865	-0.0025	0.49	0.257	-0.233	-0.089	-0.0865	0.0025	0.00808265	0.0145569	0.00647425	4.733	4.424	-0.309	-224548	-225986	-1437.57	-224572	-226010	-1438.02	-0.702	-0.642	0.06	111.145	167.048	174.183	1.10771	8.328	1.77443	-959.769	-958.05	-1.719	-0.317	-0.45	0.133
THTP (3,5,6,7-tetrahydro-2H-thiazolo[3,2-a]pyrimidine)	N-Nucleophile	Dichloromethane	14.45	0.78	-739.539	-742.464	-2.925	-0.334	-0.222	0.112	0.143	0.006	-0.137	0.0955	0.108	0.0125	0.477	0.228	-0.249	-0.0955	-0.108	-0.0125	0.00956001	0.0255789	0.0160189	6.215	6.011	-0.204	-463955	-465797	-1842.18	-463981	-465823	-1842.75	-0.689	-0.604	0.085	142.222	190.285	208.704	1.11851	9.051	2.03296	-959.769	-958.05	-1.719	-0.317	-0.45	0.133
Dipropylamine	N-Nucleophile	MeCN	14.51	0.8	-290.458	-292.507	-2.049	-0.362	-0.226	0.136	0.159	0.044	-0.115	0.1015	0.091	-0.0105	0.521	0.27	-0.251	-0.1015	-0.091	0.0105	0.009887	0.0153352	0.00544819	1.364	1.261	-0.103	-182122	-183416	-1294.4	-182150	-183443	-1293.43	-0.759	-0.689	0.07	101.19	199.052	213.422	1.15274	10.196	2.33991	-132.801	-131.97	-0.831	-0.341	-0.475	0.134
4-(2-(Fluorodiphenylmethyl)pyrrolidin-1-yl)pyridine	N-Nucleophile	Dichloromethane	14.57	0.75	-1053.9	-1060.59	-6.694	-0.311	-0.216	0.095	0.117	-0.029	-0.146	0.097	0.1225	0.0255	0.428	0.187	-0.241	-0.097	-0.1225	-0.0255	0.0109918	0.0401237	0.0291318	7.651	8.075	0.424	-661064	-665280	-4216.37	-661108	-665326	-4217.76	-0.602	-0.532	0.07	332.414	378.305	478.923	1.27817	13.955	3.44819	-959.769	-958.05	-1.719	-0.317	-0.45	0.133
2-Methyl-1,4,5,6-tetrahydropyrimidine	N-Nucleophile	DMSO	14.58	0.79	-304.138	-306.143	-2.005	-0.34	-0.219	0.121	0.153	0.029	-0.124	0.0935	0.095	0.0015	0.493	0.248	-0.245	-0.0935	-0.095	-0.0015	0.00886638	0.0181956	0.00932919	4.075	4.316	0.241	-190744	-192008	-1264.56	-190768	-192033	-1265.31	-0.719	-0.643	0.076	98.1463	166.511	172.417	1.11168	8.239	1.75769	-553.272	-551.617	-1.655	-0.237	-0.369	0.132
4-(Morpholino)pyridine	N-Nucleophile	Dichloromethane	14.59	0.69	-531.667	-535.029	-3.362	-0.324	-0.222	0.102	0.126	-0.016	-0.142	0.099	0.119	0.02	0.45	0.206	-0.244	-0.099	-0.119	-0.02	0.01089	0.0343714	0.0234814	3.066	4.002	0.936	-333483	-335601	-2118.12	-333512	-335631	-2119.33	-0.586	-0.526	0.06	164.204	219.522	246.64	1.1544	10.353	2.62952	-959.769	-958.05	-1.719	-0.317	-0.45	0.133
2-Phenyl-1,4,5,6-tetrahydropyrimidine	N-Nucleophile	Dichloromethane	14.62	0.72	-494.685	-497.923	-3.238	-0.328	-0.225	0.103	0.109	-0.034	-0.143	0.1095	0.1295	0.02	0.437	0.191	-0.246	-0.1095	-0.1295	-0.02	0.0137188	0.0439012	0.0301824	3.73	3.746	0.016	-310276	-312317	-2040.66	-310305	-312346	-2041.29	-0.71	-0.639	0.071	160.216	229.524	253.858	1.18402	11.555	2.62558	-959.769	-958.05	-1.719	-0.317	-0.45	0.133
Diethylamine	N-Nucleophile	Water	14.68	0.53	-212.375	-213.863	-1.488	-0.368	-0.227	0.141	0.161	0.045	-0.116	0.1035	0.091	-0.0125	0.529	0.272	-0.257	-0.1035	-0.091	0.0125	0.010125	0.0152224	0.00509743	1.376	1.282	-0.094	-133164	-134103	-939.482	-133187	-134127	-939.826	-0.716	-0.689	0.027	73.1368	159.3	158.883	1.12311	9.153	1.90215	-76.455	-76.055	-0.4	-0.304	-0.505	0.201
4-Pyridone anion	N-Nucleophile	Water	14.76	0.48	-321.155	-323.122	-1.967	-0.275	-0.183	0.092	0.162	0.015	-0.147	0.0565	0.084	0.0275	0.437	0.198	-0.239	-0.0565	-0.084	-0.0275	0.00365246	0.0178182	0.0141657	3.51	2.864	-0.646	-201471	-202708	-1237.81	-201492	-202730	-1238.14	-0.694	-0.605	0.089	94.0914	137.585	133.789	1.0878	7.287	1.69573	-76.455	-76.055	-0.4	-0.304	-0.505	0.201
Theophylline anion	N-Nucleophile	DMSO	14.78	0.71	-636.992	-640.766	-3.774	-0.274	-0.189	0.085	0.162	0.003	-0.159	0.056	0.093	0.037	0.436	0.192	-0.244	-0.056	-0.093	-0.037	0.00359633	0.0225234	0.0189271	6.42	6.143	-0.277	-399612	-401987	-2375.31	-399642	-402018	-2376.24	-0.723	-0.579	0.144	179.156	207.627	223.674	1.16537	9.85	2.34249	-553.272	-551.617	-1.655	-0.237	-0.369	0.132
4-(Morpholino)pyridine	N-Nucleophile	MeCN	14.8	0.63	-531.669	-535.03	-3.361	-0.324	-0.222	0.102	0.125	-0.017	-0.142	0.0995	0.1195	0.02	0.449	0.205	-0.244	-0.0995	-0.1195	-0.02	0.0110248	0.0348299	0.0238051	3.189	4.159	0.97	-333484	-335602	-2118.07	-333513	-335632	-2119.21	-0.592	-0.532	0.06	164.204	219.543	246.665	1.15444	10.353	2.62944	-132.801	-131.97	-0.831	-0.341	-0.475	0.134
4-(Dimethylamino)pyridine	N-Nucleophile	DMSO	14.8	0.67	-379.875	-382.362	-2.487	-0.311	-0.215	0.096	0.132	-0.013	-0.145	0.0895	0.114	0.0245	0.443	0.202	-0.241	-0.0895	-0.114	-0.0245	0.00904091	0.0321683	0.0231274	5.728	6.334	0.606	-238262	-239829	-1567.32	-238288	-239856	-1568.14	-0.614	-0.543	0.071	122.168	187.532	201.012	1.13027	9.046	2.12504	-553.272	-551.617	-1.655	-0.237	-0.369	0.132
4-Nitro-imidazole anion	N-Nucleophile	DMSO	14.81	0.71	-427.93	-430.375	-2.445	-0.3	-0.216	0.084	0.097	-0.061	-0.158	0.1015	0.1385	0.037	0.397	0.155	-0.242	-0.1015	-0.1385	-0.037	0.0129751	0.0618782	0.0489031	1.363	1.375	0.012	-268485	-270022	-1537.16	-268508	-270045	-1537.58	-0.658	-0.585	0.073	112.067	135.474	127.571	1.10563	8.138	1.84489	-553.272	-551.617	-1.655	-0.237	-0.369	0.132
Maleimide anion	N-Nucleophile	DMSO	14.87	0.76	-357.014	-359.051	-2.037	-0.335	-0.218	0.117	0.099	-0.052	-0.151	0.118	0.135	0.017	0.434	0.166	-0.268	-0.118	-0.135	-0.017	0.0160415	0.0548946	0.0388531	6.926	6.017	-0.909	-223989	-225270	-1280.96	-224010	-225292	-1281.28	-0.89	-0.764	0.126	96.0642	126.479	117.963	1.08754	7.597	1.71219	-553.272	-551.617	-1.655	-0.237	-0.369	0.132
4-(Dimethylamino)pyridine	N-Nucleophile	DMF	14.9	0.67	-379.875	-382.362	-2.487	-0.311	-0.215	0.096	0.132	-0.013	-0.145	0.0895	0.114	0.0245	0.443	0.202	-0.241	-0.0895	-0.114	-0.0245	0.00904091	0.0321683	0.0231274	5.714	6.318	0.604	-238261	-239829	-1567.32	-238288	-239856	-1568.13	-0.613	-0.542	0.071	122.168	187.533	201.006	1.1303	9.046	2.12504	-248.592	-247.066	-1.526	-0.25	-0.375	0.125
(2S,3S)-3-Isopropyl-2-phenyl-3,4-dihydro-2H-benzo[4,5]thiazolo[3,2-a]pyrimidine	N-Nucleophile	Dichloromethane	14.96	0.64	-1237.77	-1244	-6.238	-0.288	-0.206	0.082	0.117	-0.022	-0.139	0.0855	0.114	0.0285	0.405	0.184	-0.221	-0.0855	-0.114	-0.0285	0.009025	0.0353152	0.0262902	5.232	4.716	-0.516	-776465	-780394	-3929.06	-776506	-780436	-3930.64	-0.681	-0.592	0.089	308.44	359.99	448.038	1.27156	15.418	3.65825	-959.769	-958.05	-1.719	-0.317	-0.45	0.133
Purine anion	N-Nucleophile	DMSO	15.03	0.77	-409.087	-411.58	-2.493	-0.295	-0.216	0.079	0.125	-0.021	-0.146	0.085	0.1185	0.0335	0.42	0.195	-0.225	-0.085	-0.1185	-0.0335	0.00860119	0.0360058	0.0274046	2.419	2.056	-0.363	-256647	-258215	-1567.92	-256669	-258237	-1568.32	-0.734	-0.634	0.1	119.104	149.337	148.427	1.10175	8.777	1.83877	-553.272	-551.617	-1.655	-0.237	-0.369	0.132
Diethylamine	N-Nucleophile	MeCN	15.1	0.73	-212.375	-213.863	-1.488	-0.368	-0.227	0.141	0.161	0.045	-0.116	0.1035	0.091	-0.0125	0.529	0.272	-0.257	-0.1035	-0.091	0.0125	0.010125	0.0152224	0.00509743	1.361	1.266	-0.095	-133164	-134103	-939.485	-133187	-134127	-939.832	-0.715	-0.689	0.026	73.1368	159.305	158.885	1.12313	9.153	1.90214	-132.801	-131.97	-0.831	-0.341	-0.475	0.134
n-Propylamine	N-Nucleophile	MeCN	15.11	0.63	-173.338	-174.545	-1.207	-0.39	-0.242	0.148	0.162	0.046	-0.116	0.114	0.098	-0.016	0.552	0.288	-0.264	-0.114	-0.098	0.016	0.0117717	0.0166736	0.00490187	1.681	1.646	-0.035	-108687	-109449	-761.847	-108708	-109470	-762.118	-0.857	-0.854	0.003	59.1103	134.696	130.025	1.08541	7.885	1.60096	-132.801	-131.97	-0.831	-0.341	-0.475	0.134
Methylamine	N-Nucleophile	MeCN	15.19	0.68	-95.247	-95.893	-0.646	-0.393	-0.242	0.151	0.162	0.046	-0.116	0.1155	0.098	-0.0175	0.555	0.288	-0.267	-0.1155	-0.098	0.0175	0.0120182	0.0166736	0.00465537	1.733	1.692	-0.041	-59723	-60130.8	-407.797	-59740	-60147.9	-407.878	-0.848	-0.845	0.003	31.0571	88.7737	73.737	1.04412	5.344	0.901615	-132.801	-131.97	-0.831	-0.341	-0.475	0.134
4-Aminopyridine	N-Nucleophile	Dichloromethane	15.2	0.67	-301.811	-303.733	-1.922	-0.331	-0.231	0.1	0.132	-0.015	-0.147	0.0995	0.123	0.0235	0.463	0.216	-0.247	-0.0995	-0.123	-0.0235	0.0106914	0.0350208	0.0243294	4.674	5.227	0.553	-189315	-190525	-1210.73	-189337	-190548	-1211.14	-0.813	-0.765	0.048	94.1145	148.075	147.251	1.09824	7.801	1.71985	-959.769	-958.05	-1.719	-0.317	-0.45	0.133
2-Methyl-1,4,5,6-tetrahydropyrimidine	N-Nucleophile	Dichloromethane	15.21	0.69	-302.357	-304.343	-1.986	-0.156	-0.073	0.083	0.18	0.064	-0.116	-0.012	0.0045	0.0165	0.336	0.137	-0.199	0.012	-0.0045	-0.0165	0.000214286	7.39051e-05	-0.000140381	7.033	5.336	-1.697	-189653	-190904	-1251.49	-189676	-190928	-1252.03	-0.757	-0.735	0.022	95.1225	155.564	155.056	1.11474	8.213	1.71699	-959.769	-958.05	-1.719	-0.317	-0.45	0.133
n-Butylamine	N-Nucleophile	MeCN	15.27	0.63	-212.382	-213.869	-1.487	-0.39	-0.242	0.148	0.161	0.045	-0.116	0.1145	0.0985	-0.016	0.551	0.287	-0.264	-0.1145	-0.0985	0.016	0.0118968	0.0169029	0.0050061	1.73	1.693	-0.037	-133167	-134106	-938.793	-133191	-134130	-939.202	-0.857	-0.853	0.004	73.1368	157.044	158.025	1.1112	9.159	1.9605	-132.801	-131.97	-0.831	-0.341	-0.475	0.134
Benzylamine	N-Nucleophile	DMSO	15.28	0.65	-324.844	-327.002	-2.158	-0.331	-0.242	0.089	0.127	-0.012	-0.139	0.102	0.127	0.025	0.458	0.23	-0.228	-0.102	-0.127	-0.025	0.0113581	0.035063	0.023705	1.847	1.979	0.132	-203740	-205100	-1359.83	-203765	-205126	-1360.09	-0.85	-0.851	-0.001	107.153	177.02	184.406	1.13005	9.522	2.03314	-553.272	-551.617	-1.655	-0.237	-0.369	0.132
DBU	N-Nucleophile	MeCN	15.29	0.7	-459.134	-462.218	-3.084	-0.322	-0.208	0.114	0.153	0.026	-0.127	0.0845	0.091	0.0065	0.475	0.234	-0.241	-0.0845	-0.091	-0.0065	0.00751605	0.0176944	0.0101784	4.429	4.43	0.001	-287940	-289886	-1945.8	-287969	-289915	-1946.49	-0.704	-0.62	0.084	152.237	221.732	258.983	1.12868	9.537	2.26259	-132.801	-131.97	-0.831	-0.341	-0.475	0.134
(R)-2-Benzhydryl-3,4-dihydro-2H-benzo[4,5]thiazolo[3,2-a]pyrimidine	N-Nucleophile	Dichloromethane	15.3	0.55	-1389.28	-1396.47	-7.188	-0.288	-0.206	0.082	0.117	-0.023	-0.14	0.0855	0.1145	0.029	0.405	0.183	-0.222	-0.0855	-0.1145	-0.029	0.009025	0.0358204	0.0267954	5.337	4.808	-0.529	-871522	-876048	-4526.08	-871567	-876095	-4527.86	-0.684	-0.596	0.088	356.483	412.086	506.328	1.3416	15.936	4.09499	-959.769	-958.05	-1.719	-0.317	-0.45	0.133
2-Ac super-dmap	N-Nucleophile	MeCN	15.39	0.6	-869.366	-874.736	-5.37	-0.308	-0.215	0.093	0.121	-0.03	-0.151	0.0935	0.1225	0.029	0.429	0.185	-0.244	-0.0935	-0.1225	-0.029	0.0101891	0.0405574	0.0303683	2.133	3.231	1.098	-545332	-548714	-3381.98	-545370	-548753	-3382.88	-0.582	-0.513	0.069	260.292	296.636	357.442	1.21808	12.088	3.06466	-132.801	-131.97	-0.831	-0.341	-0.475	0.134
1-Aminopropan-2-ol	N-Nucleophile	DMSO	15.47	0.65	-248.222	-249.787	-1.565	-0.392	-0.243	0.149	0.157	0.038	-0.119	0.1175	0.1025	-0.015	0.549	0.281	-0.268	-0.1175	-0.1025	0.015	0.012574	0.0186944	0.0061204	1.438	1.34	-0.098	-155673	-156661	-987.563	-155696	-156684	-987.957	-0.858	-0.855	0.003	75.1097	141.853	139.951	1.08837	7.861	1.60991	-553.272	-551.617	-1.655	-0.237	-0.369	0.132
DBN (in CH2Cl2)	N-Nucleophile	Dichloromethane	15.5	0.55	-381.053	-383.574	-2.521	-0.326	-0.21	0.116	0.15	0.026	-0.124	0.088	0.092	0.004	0.476	0.236	-0.24	-0.088	-0.092	-0.004	0.00813445	0.0179322	0.00979775	4.046	4.018	-0.028	-238984	-240574	-1589.9	-239009	-240599	-1590.48	-0.689	-0.609	0.08	124.184	191.263	209.125	1.12275	9.038	1.97764	-959.769	-958.05	-1.719	-0.317	-0.45	0.133
4-(Dimethylamino)pyridine (in MeCN)	N-Nucleophile	MeCN	15.51	0.62	-379.875	-382.362	-2.487	-0.311	-0.215	0.096	0.132	-0.013	-0.145	0.0895	0.114	0.0245	0.443	0.202	-0.241	-0.0895	-0.114	-0.0245	0.00904091	0.0321683	0.0231274	5.711	6.314	0.603	-238261	-239829	-1567.32	-238288	-239856	-1568.13	-0.613	-0.542	0.071	122.168	187.532	201.004	1.1303	9.046	2.12504	-132.801	-131.97	-0.831	-0.341	-0.475	0.134
Diethanolamine (in DMSO)	N-Nucleophile	DMSO	15.51	0.7	-362.126	-364.33	-2.204	-0.368	-0.228	0.14	0.158	0.038	-0.12	0.105	0.095	-0.01	0.526	0.266	-0.26	-0.105	-0.095	0.01	0.01048	0.0169643	0.00648425	1.75	1.743	-0.007	-227125	-228514	-1389.66	-227152	-228542	-1389.94	-0.722	-0.69	0.032	105.136	172.164	178.833	1.12176	8.609	2.08251	-553.272	-551.617	-1.655	-0.237	-0.369	0.132
Phthalimide anion (in DMSO)	N-Nucleophile	DMSO	15.52	0.67	-509.716	-512.75	-3.034	-0.325	-0.221	0.104	0.091	-0.05	-0.141	0.117	0.1355	0.0185	0.416	0.171	-0.245	-0.117	-0.1355	-0.0185	0.0164531	0.0536849	0.0372318	12.519	11.343	-1.176	-319777	-321686	-1908.14	-319802	-321711	-1908.71	-0.863	-0.73	0.133	146.123	177.2	184.469	1.13093	8.968	2.19364	-553.272	-551.617	-1.655	-0.237	-0.369	0.132
Morpholine (in water)	N-Nucleophile	Water	15.62	0.54	-286.067	-287.868	-1.801	-0.365	-0.225	0.14	0.156	0.04	-0.116	0.1045	0.0925	-0.012	0.521	0.265	-0.256	-0.1045	-0.0925	0.012	0.0104801	0.0161439	0.00566378	3.198	3.033	-0.165	-179415	-180552	-1136.46	-179437	-180574	-1136.84	-0.716	-0.69	0.026	87.1204	145.179	148.535	1.07055	7.176	1.51301	-76.455	-76.055	-0.4	-0.304	-0.505	0.201
Morpholine (in MeCN)	N-Nucleophile	MeCN	15.65	0.74	-286.067	-287.868	-1.801	-0.365	-0.225	0.14	0.156	0.039	-0.117	0.1045	0.093	-0.0115	0.521	0.264	-0.257	-0.1045	-0.093	0.0115	0.0104801	0.0163807	0.0059006	3.172	3.007	-0.165	-179415	-180552	-1136.48	-179437	-180574	-1136.86	-0.715	-0.689	0.026	87.1204	145.183	148.524	1.07063	7.176	1.51302	-132.801	-131.97	-0.831	-0.341	-0.475	0.134
2-(Naphthylmethyl)quinuclidine (in MeCN)	N-Nucleophile	MeCN	15.66	0.62	-747.277	-752.265	-4.988	-0.293	-0.223	0.07	0.087	-0.051	-0.138	0.103	0.137	0.034	0.38	0.172	-0.208	-0.103	-0.137	-0.034	0.0139592	0.054561	0.0406018	2.166	2.071	-0.095	-468696	-471839	-3143.78	-468731	-471876	-3144.52	-0.575	-0.523	0.052	249.35	313.005	385.659	1.22181	12.384	3.17461	-132.801	-131.97	-0.831	-0.341	-0.475	0.134
N',N'-Dimethylformohydrazide (in MeCN)	N-Nucleophile	MeCN	15.69	0.51	-302.075	-303.925	-1.85	-0.394	-0.253	0.141	0.158	0.014	-0.144	0.118	0.1195	0.0015	0.552	0.267	-0.285	-0.118	-0.1195	-0.0015	0.0126123	0.026742	0.0141297	5.626	5.464	-0.162	-189471	-190637	-1166.17	-189495	-190661	-1166.58	-0.517	-0.456	0.061	88.1084	151.981	148.654	1.12011	8.102	1.85255	-132.801	-131.97	-0.831	-0.341	-0.475	0.134
1-Methyl-2-phenylpyrrolidine (in MeCN)	N-Nucleophile	MeCN	15.7	0.54	-479.83	-483.067	-3.237	-0.325	-0.206	0.119	0.126	-0.017	-0.143	0.0995	0.1115	0.012	0.451	0.189	-0.262	-0.0995	-0.1115	-0.012	0.0109759	0.0328896	0.0219137	0.656	0.578	-0.078	-300932	-302973	-2040.97	-300962	-303004	-2041.77	-0.584	-0.528	0.056	161.244	236.255	274.107	1.15795	10.602	2.47088	-132.801	-131.97	-0.831	-0.341	-0.475	0.134
n-Propylamine (in DMSO)	N-Nucleophile	DMSO	15.7	0.64	-173.338	-174.545	-1.207	-0.39	-0.242	0.148	0.162	0.046	-0.116	0.114	0.098	-0.016	0.552	0.288	-0.264	-0.114	-0.098	0.016	0.0117717	0.0166736	0.00490187	1.686	1.652	-0.034	-108687	-109449	-761.845	-108708	-109470	-762.116	-0.857	-0.854	0.003	59.1103	134.696	130.025	1.0854	7.885	1.60097	-553.272	-551.617	-1.655	-0.237	-0.369	0.132
N-methyl-trifluoroacetamide anion (in DMSO)	N-Nucleophile	DMSO	15.7	0.71	-543.216	-545.9	-2.684	-0.31	-0.188	0.122	0.19	0.046	-0.144	0.06	0.071	0.011	0.5	0.234	-0.266	-0.06	-0.071	-0.011	0.0036	0.0107714	0.00717137	7.001	6.408	-0.593	-340824	-342511	-1687.52	-340849	-342537	-1688.17	-0.793	-0.692	0.101	126.057	136.661	130.385	1.09921	7.884	1.75692	-553.272	-551.617	-1.655	-0.237	-0.369	0.132
4-(dimethylamino)pyridine (in CH2Cl2)	N-Nucleophile	Dichloromethane	15.8	0.66	-379.874	-382.361	-2.487	-0.311	-0.214	0.097	0.134	-0.012	-0.146	0.0885	0.113	0.0245	0.445	0.202	-0.243	-0.0885	-0.113	-0.0245	0.00880028	0.0316064	0.0228062	5.513	6.078	0.565	-238261	-239828	-1567.35	-238287	-239855	-1568.16	-0.606	-0.535	0.071	122.168	187.524	200.99	1.13031	9.047	2.12496	-959.769	-958.05	-1.719	-0.317	-0.45	0.133
trifluoroacetamide anion (in DMSO)	N-Nucleophile	DMSO	15.81	0.64	-504.195	-506.594	-2.399	-0.332	-0.203	0.129	0.225	0.053	-0.172	0.0535	0.075	0.0215	0.557	0.256	-0.301	-0.0535	-0.075	-0.0215	0.00256934	0.0109863	0.00841698	7.219	6.749	-0.47	-316357	-317864	-1507.61	-316380	-317888	-1508.19	-0.953	-0.877	0.076	112.031	114.49	101.972	1.08485	6.536	1.60484	-553.272	-551.617	-1.655	-0.237	-0.369	0.132
4-(dimethylamino)pyridine (in THF)	N-Nucleophile	THF	15.9	0.66	-379.874	-382.361	-2.487	-0.31	-0.214	0.096	0.134	-0.012	-0.146	0.088	0.113	0.025	0.444	0.202	-0.242	-0.088	-0.113	-0.025	0.00872072	0.0316064	0.0228857	5.464	6.019	0.555	-238260	-239828	-1567.35	-238287	-239855	-1568.15	-0.605	-0.534	0.071	122.168	187.522	200.994	1.13028	9.047	2.12496	-232.511	-231.032	-1.479	-0.246	-0.404	0.158
4-pyrrolidinopyridine (in CH2Cl2)	N-Nucleophile	Dichloromethane	15.9	0.67	-456.804	-459.805	-3.001	-0.305	-0.211	0.094	0.134	-0.012	-0.146	0.0855	0.1115	0.026	0.439	0.199	-0.24	-0.0855	-0.1115	-0.026	0.00832603	0.0312368	0.0229108	6.107	6.601	0.494	-286510	-288401	-1891.65	-286537	-288429	-1892.15	-0.614	-0.539	0.075	148.205	213.733	238.122	1.15061	10.251	2.48132	-959.769	-958.05	-1.719	-0.317	-0.45	0.133
ethyl N-acetylcarbamate anion (in DMSO)	N-Nucleophile	DMSO	15.99	0.7	-473.299	-476.065	-2.766	-0.342	-0.217	0.125	0.171	0.02	-0.151	0.0855	0.0985	0.013	0.513	0.237	-0.276	-0.0855	-0.0985	-0.013	0.007125	0.0204689	0.0133439	5.85	5.661	-0.189	-296905	-298646	-1741.57	-296934	-298677	-1743.25	-0.921	-0.787	0.134	130.122	188.129	188.824	1.18215	10.348	2.33502	-553.272	-551.617	-1.655	-0.237	-0.369	0.132
succinimide anion (in DMSO)	N-Nucleophile	DMSO	16.03	0.66	-358.212	-360.29	-2.078	-0.34	-0.212	0.128	0.172	0.021	-0.151	0.084	0.0955	0.0115	0.512	0.233	-0.279	-0.084	-0.0955	-0.0115	0.00689063	0.0195714	0.0126807	7.513	6.564	-0.949	-224724	-226032	-1308.18	-224747	-226055	-1308.49	-0.861	-0.738	0.123	98.0801	134.438	129.6	1.0857	7.598	1.74479	-553.272	-551.617	-1.655	-0.237	-0.369	0.132
diacetamide anion (in DMSO)	N-Nucleophile	DMSO	16.05	0.7	-359.36	-361.488	-2.128	-0.332	-0.209	0.123	0.175	0.012	-0.163	0.0785	0.0985	0.02	0.507	0.221	-0.286	-0.0785	-0.0985	-0.02	0.00607717	0.0219508	0.0158736	3.951	3.676	-0.275	-225431	-226770	-1339.26	-225457	-226797	-1339.36	-0.905	-0.758	0.147	100.096	153.726	149.15	1.13046	8.509	1.89169	-553.272	-551.617	-1.655	-0.237	-0.369	0.132
2-formyl-imidazole anion (in DMSO)	N-Nucleophile	DMSO	16.06	0.68	-337.152	-339.165	-2.013	-0.276	-0.199	0.077	0.133	-0.023	-0.156	0.0715	0.111	0.0395	0.409	0.176	-0.233	-0.0715	-0.111	-0.0395	0.00624969	0.0350028	0.0287531	2.999	3.429	0.43	-211517	-212783	-1266.3	-211539	-212805	-1266.51	-0.615	-0.569	0.046	95.0794	134.904	126.633	1.10641	8.285	1.76741	-553.272	-551.617	-1.655	-0.237	-0.369	0.132
ethanolamine (in DMSO)	N-Nucleophile	DMSO	16.07	0.66	-209.172	-210.456	-1.284	-0.396	-0.246	0.15	0.163	0.044	-0.119	0.1165	0.101	-0.0155	0.559	0.29	-0.269	-0.1165	-0.101	0.0155	0.0121398	0.0175879	0.00544817	1.531	1.478	-0.053	-131188	-131998	-809.573	-131209	-132019	-809.943	-0.86	-0.855	0.005	61.0831	122.32	113.047	1.08205	7.607	1.53513	-553.272	-551.617	-1.655	-0.237	-0.369	0.132
DBU (in THF)	N-Nucleophile	THF	16.12	0.67	-459.132	-462.217	-3.085	-0.321	-0.207	0.114	0.152	0.027	-0.125	0.0845	0.09	0.0055	0.473	0.234	-0.239	-0.0845	-0.09	-0.0055	0.00754783	0.0173077	0.00975986	4.156	4.152	-0.004	-287940	-289885	-1945.87	-287968	-289914	-1946.56	-0.692	-0.61	0.082	152.237	221.788	258.999	1.12892	9.542	2.2632	-232.511	-231.032	-1.479	-0.246	-0.404	0.158
1,2-dimethylhydrazine (in MeCN)	N-Nucleophile	MeCN	16.15	0.68	-188.288	-190.541	-2.253	-0.338	-0.201	0.137	0.163	0.045	-0.118	0.0875	0.078	-0.0095	0.501	0.246	-0.255	-0.0875	-0.078	0.0095	0.00764097	0.0123659	0.00472489	0	0	0	-118703	-119494	-791.275	-118724	-119516	-791.559	-0.515	-0.509	0.006	60.0983	130.557	122.248	1.09621	7.757	1.50272	-132.801	-131.97	-0.831	-0.341	-0.475	0.134
1,2,3,5,6,7-hexahydroimidazo[1,2-a]pyrimidine (TBN)	N-Nucleophile	Dichloromethane	16.15	0.73	-397.058	-399.62	-2.562	-0.328	-0.21	0.118	0.153	0.035	-0.118	0.0875	0.0875	0	0.481	0.245	-0.236	-0.0875	-0.0875	1.38778e-17	0.00795868	0.015625	0.00766632	4.396	4.099	-0.297	-249034	-250649	-1615.16	-249059	-250675	-1615.67	-0.703	-0.649	0.054	125.172	185.474	200.265	1.12065	8.989	1.94684	-959.769	-958.05	-1.719	-0.317	-0.45	0.133
2,3,4,6,7,8-hexahydro-1H-pyrimido[1,2-a]pyrimidine	N-Nucleophile	Dichloromethane	16.16	0.75	-436.098	-438.942	-2.844	-0.326	-0.208	0.118	0.152	0.031	-0.121	0.087	0.0885	0.0015	0.478	0.239	-0.239	-0.087	-0.0885	-0.0015	0.00791736	0.0163855	0.0084681	3.828	3.647	-0.181	-273512	-275305	-1793.45	-273538	-275333	-1794.22	-0.712	-0.659	0.053	139.198	202.241	225.386	1.12938	9.356	2.09885	-959.769	-958.05	-1.719	-0.317	-0.45	0.133
DBN (in MeCN)	N-Nucleophile	MeCN	16.28	0.67	-381.054	-383.575	-2.521	-0.327	-0.211	0.116	0.15	0.026	-0.124	0.0885	0.0925	0.004	0.477	0.237	-0.24	-0.0885	-0.0925	-0.004	0.00820991	0.0180512	0.00984125	4.247	4.225	-0.022	-238984	-240574	-1589.83	-239010	-240600	-1590.4	-0.699	-0.617	0.082	124.184	191.266	209.107	1.12283	9.038	1.97769	-132.801	-131.97	-0.831	-0.341	-0.475	0.134
benzotriazole anion (in DMSO)	N-Nucleophile	DMSO	16.29	0.65	-393.034	-395.495	-2.461	-0.283	-0.202	0.081	0.127	-0.015	-0.142	0.078	0.1085	0.0305	0.41	0.187	-0.223	-0.078	-0.1085	-0.0305	0.00741951	0.0314766	0.0240571	8.856	8.482	-0.374	-246566	-248115	-1548.64	-246589	-248138	-1549.06	-0.452	-0.41	0.042	118.116	155.371	157.723	1.10077	8.272	1.88562	-553.272	-551.617	-1.655	-0.237	-0.369	0.132
1-methyl uracil anion (in DMSO)	N-Nucleophile	DMSO	16.36	0.69	-451.127	-453.772	-2.645	-0.312	-0.206	0.106	0.155	0.003	-0.152	0.0785	0.1015	0.023	0.467	0.209	-0.258	-0.0785	-0.1015	-0.023	0.0065977	0.0246465	0.0180488	12.4	11.379	-1.021	-283013	-284678	-1664.54	-283038	-284704	-1665.38	-0.852	-0.725	0.127	125.105	161.017	162.7	1.11738	8.674	1.9944	-553.272	-551.617	-1.655	-0.237	-0.369	0.132
4-formyl-imidazole anion (in DMSO)	N-Nucleophile	DMSO	16.4	0.67	-337.155	-339.166	-2.011	-0.284	-0.204	0.08	0.138	-0.019	-0.157	0.073	0.1115	0.0385	0.422	0.185	-0.237	-0.073	-0.1115	-0.0385	0.00631398	0.0336007	0.0272867	3.442	2.878	-0.564	-211519	-212783	-1264.82	-211541	-212806	-1265.09	-0.684	-0.585	0.099	95.0794	133.923	126.429	1.09955	7.692	1.78863	-553.272	-551.617	-1.655	-0.237	-0.369	0.132
(R)-2-isopropyl-3,4-dihydro-2H-benzo[4,5]thiazolo[3,2-a]pyrimidine	N-Nucleophile	Dichloromethane	16.5	0.48	-1008.18	-1012.91	-4.725	-0.287	-0.205	0.082	0.118	-0.021	-0.139	0.0845	0.113	0.0285	0.405	0.184	-0.221	-0.0845	-0.113	-0.0285	0.00881512	0.0346984	0.0258832	5.007	4.588	-0.419	-632455	-635431	-2976.27	-632489	-635467	-2977.5	-0.677	-0.591	0.086	232.345	286.049	341.783	1.21022	12.936	3.00639	-959.769	-958.05	-1.719	-0.317	-0.45	0.133
N-methyl-morpholine (in CH2Cl2)	N-Nucleophile	Dichloromethane	16.5	0.52	-325.101	-327.184	-2.083	-0.346	-0.213	0.133	0.154	0.039	-0.115	0.096	0.087	-0.009	0.5	0.252	-0.248	-0.096	-0.087	0.009	0.009216	0.0150179	0.00580186	1.819	1.705	-0.114	-203890	-205205	-1314.39	-203914	-205229	-1314.79	-0.579	-0.529	0.05	101.147	163.905	175.409	1.0818	7.851	1.72869	-959.769	-958.05	-1.719	-0.317	-0.45	0.133
2-Me super-dmap (in MeCN)	N-Nucleophile	MeCN	16.65	0.58	-643.786	-647.963	-4.177	-0.279	-0.181	0.098	0.127	-0.007	-0.134	0.076	0.094	0.018	0.406	0.174	-0.232	-0.076	-0.094	-0.018	0.0071133	0.0253908	0.0182775	5.98	6.925	0.945	-403794	-406427	-2632.65	-403826	-406460	-2633.64	-0.532	-0.507	0.025	204.272	258.042	306.894	1.17297	11.411	2.59641	-132.801	-131.97	-0.831	-0.341	-0.475	0.134
1-methyl-2-phenylpyrrolidine (in CH2Cl2)	N-Nucleophile	Dichloromethane	16.8	0.49	-325.102	-327.185	-2.083	-0.347	-0.213	0.134	0.154	0.039	-0.115	0.0965	0.087	-0.0095	0.501	0.252	-0.249	-0.0965	-0.087	0.0095	0.00929366	0.0150179	0.00572419	1.876	1.763	-0.113	-203891	-205205	-1314.33	-203915	-205230	-1314.73	-0.581	-0.53	0.051	101.147	163.887	175.406	1.08169	7.851	1.7287	-959.769	-958.05	-1.719	-0.317	-0.45	0.133
N-methyl-morpholine (in MeCN)	N-Nucleophile	MeCN	16.8	0.52	-479.837	-483.073	-3.236	-0.328	-0.222	0.106	0.13	-0.013	-0.143	0.099	0.1175	0.0185	0.458	0.209	-0.249	-0.099	-0.1175	-0.0185	0.0106998	0.0330293	0.0223295	1.102	0.971	-0.131	-300936	-302977	-2040.65	-300966	-303008	-2041.26	-0.58	-0.528	0.052	161.244	240.208	275.372	1.17372	10.761	2.53051	-132.801	-131.97	-0.831	-0.341	-0.475	0.134
2-Et super-dmap (in MeCN)	N-Nucleophile	MeCN	16.81	0.6	-721.871	-726.611	-4.74	-0.276	-0.179	0.097	0.127	-0.006	-0.133	0.0745	0.0925	0.018	0.403	0.173	-0.23	-0.0745	-0.0925	-0.018	0.00688617	0.024729	0.0178429	5.81	6.731	0.921	-452754	-455742	-2987.81	-452790	-455780	-2989.18	-0.528	-0.505	0.023	232.325	296.241	360.582	1.20939	13.424	2.95717	-132.801	-131.97	-0.831	-0.341	-0.475	0.134
morpholine (in DMSO)	N-Nucleophile	DMSO	16.96	0.67	-286.078	-287.88	-1.802	-0.372	-0.232	0.14	0.161	0.045	-0.116	0.1055	0.0935	-0.012	0.533	0.277	-0.256	-0.1055	-0.0935	0.012	0.0104411	0.0157802	0.0053391	1.946	1.951	0.005	-179422	-180559	-1136.58	-179444	-180581	-1136.88	-0.716	-0.689	0.027	87.1204	144.96	148.379	1.06969	7.233	1.52038	-553.272	-551.617	-1.655	-0.237	-0.369	0.132
uracil anion (in DMSO)	N-Nucleophile	DMSO	17.04	0.63	-412.102	-414.466	-2.364	-0.291	-0.194	0.097	0.152	-0.001	-0.153	0.0695	0.0975	0.028	0.443	0.193	-0.25	-0.0695	-0.0975	-0.028	0.00545175	0.0246276	0.0191758	3.329	2.888	-0.441	-258544	-260031	-1486.73	-258567	-260054	-1487.15	-0.731	-0.657	0.074	111.079	139.455	134.835	1.09687	7.838	1.83486	-553.272	-551.617	-1.655	-0.237	-0.369	0.132
triethylamine (in MeCN)	N-Nucleophile	MeCN	17.1	0.52	-290.449	-292.501	-2.052	-0.348	-0.216	0.132	0.16	0.047	-0.113	0.094	0.0845	-0.0095	0.508	0.263	-0.245	-0.094	-0.0845	0.0095	0.00869685	0.0135746	0.00487777	1.07	0.917	-0.153	-182117	-183412	-1295.3	-182144	-183440	-1295.93	-0.604	-0.55	0.054	101.19	195.502	211.722	1.13823	8.418	2.02186	-132.801	-131.97	-0.831	-0.341	-0.475	0.134
dimethylamine (in water)	N-Nucleophile	Water	17.12	0.5	-134.282	-135.209	-0.927	-0.37	-0.227	0.143	0.16	0.045	-0.115	0.105	0.091	-0.014	0.53	0.272	-0.258	-0.105	-0.091	0.014	0.0104009	0.0152224	0.00482148	1.388	1.281	-0.107	-84198.2	-84783.6	-585.385	-84217.4	-84803	-585.524	-0.694	-0.667	0.027	45.0837	112.543	102.406	1.06339	6.585	1.20533	-76.455	-76.055	-0.4	-0.304	-0.505	0.201
p-toluenesulfonamide anion (in DMSO)	N-Nucleophile	DMSO	17.14	0.6	-871.594	-875.176	-3.582	-0.322	-0.213	0.109	0.121	-0.018	-0.139	0.1005	0.1155	0.015	0.443	0.195	-0.248	-0.1005	-0.1155	-0.015	0.0113998	0.0342058	0.0228059	15.761	14.957	-0.804	-546832	-549086	-2254.11	-546862	-549117	-2255.71	-1.321	-1.227	0.094	170.209	209.256	224.475	1.17172	9.876	2.48608	-553.272	-551.617	-1.655	-0.237	-0.369	0.132
piperidine (in DMSO)	N-Nucleophile	DMSO	17.19	0.71	-250.255	-251.978	-1.723	-0.366	-0.227	0.139	0.157	0.042	-0.115	0.1045	0.0925	-0.012	0.523	0.269	-0.254	-0.1045	-0.0925	0.012	0.01044	0.0159038	0.0054638	1.312	1.212	-0.1	-156927	-158015	-1087.63	-156949	-158037	-1087.95	-0.719	-0.692	0.027	85.1475	154.646	163.829	1.06824	7.333	1.58332	-553.272	-551.617	-1.655	-0.237	-0.369	0.132
nitrite ion (in MeCN)	N-Nucleophile	MeCN	17.2	0.72	-204.229	-205.292	-1.063	-0.333	-0.163	0.17	0.22	0.025	-0.195	0.0565	0.069	0.0125	0.553	0.188	-0.365	-0.0565	-0.069	-0.0125	0.0028863	0.0126622	0.00977593	0.696	0.326	-0.37	-128147	-128815	-667.912	-128164	-128832	-668.004	0.372	0.2	-0.172	46.0055	65.5229	47.3726	1.03506	5.178	0.943598	-132.801	-131.97	-0.831	-0.341	-0.475	0.134
pyrrolidine (in water)	N-Nucleophile	Water	17.21	0.49	-211.202	-212.645	-1.443	-0.369	-0.228	0.141	0.154	0.039	-0.115	0.1075	0.0945	-0.013	0.523	0.267	-0.256	-0.1075	-0.0945	0.013	0.011048	0.0167233	0.00567527	1.425	1.302	-0.123	-132442	-133352	-910.575	-132463	-133374	-910.661	-0.717	-0.691	0.026	71.121	138.104	138.669	1.06612	6.604	1.40015	-76.455	-76.055	-0.4	-0.304	-0.505	0.201
piperazine (in water)	N-Nucleophile	Water	17.22	0.5	-266.245	-268.01	-1.765	-0.365	-0.227	0.138	0.158	0.042	-0.116	0.1035	0.0925	-0.011	0.523	0.269	-0.254	-0.1035	-0.0925	0.011	0.0102412	0.0159038	0.00566265	0	0	0	-166969	-168083	-1114.08	-166990	-168104	-1114.38	-0.718	-0.691	0.027	86.1356	149.82	155.538	1.07136	7.274	1.54565	-76.455	-76.055	-0.4	-0.304	-0.505	0.201
methylhydrazine (in water)	N-Nucleophile	Water	17.23	0.45	-150.251	-151.223	-0.972	-0.346	-0.205	0.141	0.162	0.044	-0.118	0.092	0.0805	-0.0115	0.508	0.249	-0.259	-0.092	-0.0805	0.0115	0.00833071	0.0130126	0.00468184	0.464	0.371	-0.093	-94226.1	-94839.9	-613.725	-94246.1	-94859.4	-613.319	-0.505	-0.681	-0.176	46.0717	105.73	93.2988	1.06301	6.453	1.1719	-76.455	-76.055	-0.4	-0.304	-0.505	0.201
triethylamine (in CH2Cl2)	N-Nucleophile	Dichloromethane	17.3	0.52	-290.449	-292.501	-2.052	-0.347	-0.216	0.131	0.16	0.047	-0.113	0.0935	0.0845	-0.009	0.507	0.263	-0.244	-0.0935	-0.0845	0.009	0.00862155	0.0135746	0.00495307	0.988	0.837	-0.151	-182117	-183412	-1295.36	-182143	-183439	-1296.01	-0.602	-0.548	0.054	101.19	195.482	211.71	1.13816	8.418	2.02141	-959.769	-958.05	-1.719	-0.317	-0.45	0.133
piperidine (in MeCN)	N-Nucleophile	MeCN	17.35	0.68	-250.255	-251.978	-1.723	-0.366	-0.227	0.139	0.157	0.042	-0.115	0.1045	0.0925	-0.012	0.523	0.269	-0.254	-0.1045	-0.0925	0.012	0.01044	0.0159038	0.0054638	1.306	1.205	-0.101	-156927	-158015	-1087.63	-156949	-158037	-1087.95	-0.719	-0.692	0.027	85.1475	154.646	163.826	1.06825	7.333	1.58331	-132.801	-131.97	-0.831	-0.341	-0.475	0.134
hydantoin anion (in DMSO)	N-Nucleophile	DMSO	17.52	0.55	-374.226	-376.345	-2.119	-0.342	-0.214	0.128	0.176	0.03	-0.146	0.083	0.092	0.009	0.518	0.244	-0.274	-0.083	-0.092	-0.009	0.00664961	0.0173443	0.0106946	7.717	7.03	-0.687	-234781	-236114	-1333.5	-234803	-236136	-1333.86	-0.746	-0.694	0.052	99.0681	128.292	120.632	1.08679	7.608	1.70878	-553.272	-551.617	-1.655	-0.237	-0.369	0.132
4,4-dimethyl-glutarimide anion (in DMSO)	N-Nucleophile	DMSO	17.52	0.63	-475.335	-478.258	-2.923	-0.333	-0.213	0.12	0.158	0.118	-0.04	0.0875	0.0475	-0.04	0.491	0.331	-0.16	-0.0875	-0.0475	0.04	0.00779659	0.00340823	-0.00438836	12.325	11.159	-1.166	-298162	-300003	-1840.61	-298190	-300031	-1841.35	-0.881	-0.748	0.133	140.16	186.427	207.286	1.10082	8.515	2.11493	-553.272	-551.617	-1.655	-0.237	-0.369	0.132
thymine anion (in DMSO)	N-Nucleophile	DMSO	17.63	0.62	-451.147	-453.793	-2.646	-0.28	-0.186	0.094	0.155	0.002	-0.153	0.0625	0.092	0.0295	0.435	0.188	-0.247	-0.0625	-0.092	-0.0295	0.00448994	0.0225106	0.0180207	5.685	5.125	-0.56	-283026	-284691	-1665.24	-283051	-284717	-1665.93	-0.725	-0.651	0.074	125.105	161.424	162.722	1.12011	8.781	2.01798	-553.272	-551.617	-1.655	-0.237	-0.369	0.132
2-Bn super-dmap (in MeCN)	N-Nucleophile	MeCN	17.69	0.57	-1102.97	-1110.17	-7.203	-0.278	-0.182	0.096	0.118	-0.021	-0.139	0.08	0.1015	0.0215	0.396	0.161	-0.235	-0.08	-0.1015	-0.0215	0.00808081	0.0319946	0.0239138	5.994	6.931	0.937	-691823	-696361	-4537.56	-691870	-696409	-4539.13	-0.525	-0.503	0.022	356.463	422.31	525.844	1.34065	18.85	4.47444	-132.801	-131.97	-0.831	-0.341	-0.475	0.134
methylhydrazine (in MeCN)	N-Nucleophile	MeCN	17.73	0.58	-150.251	-151.223	-0.972	-0.346	-0.205	0.141	0.162	0.044	-0.118	0.092	0.0805	-0.0115	0.508	0.249	-0.259	-0.092	-0.0805	0.0115	0.00833071	0.0130126	0.00468184	0.438	0.367	-0.071	-94226	-94839.8	-613.737	-94245.8	-94859.3	-613.483	-0.666	-0.68	-0.014	46.0717	105.726	93.2949	1.06299	6.453	1.17185	-132.801	-131.97	-0.831	-0.341	-0.475	0.134
trimethylhydrazine (in MeCN)	N-Nucleophile	MeCN	17.75	0.53	-228.33	-229.864	-1.534	-0.368	-0.23	0.138	0.158	0.042	-0.116	0.105	0.094	-0.011	0.526	0.272	-0.254	-0.105	-0.094	0.011	0.01048	0.0162426	0.00576261	1.889	1.81	-0.079	-143183	-144152	-968.713	-143206	-144175	-969.057	-0.512	-0.502	0.01	74.1249	149.589	149.257	1.09951	7.711	1.58667	-132.801	-131.97	-0.831	-0.341	-0.475	0.134
N-methylenepyrrolidin-1-amine (in CH2Cl2)	N-Nucleophile	Dichloromethane	17.9	0.48	-304.075	-306.088	-2.013	-0.329	-0.21	0.119	0.154	0.006	-0.148	0.0875	0.102	0.0145	0.483	0.216	-0.267	-0.0875	-0.102	-0.0145	0.00792572	0.0240833	0.0161576	2.449	2.862	0.413	-190705	-191975	-1269.79	-190729	-191999	-1270.28	-0.268	-0.259	0.009	98.1463	167.021	173.349	1.11108	8.883	1.824	-959.769	-958.05	-1.719	-0.317	-0.45	0.133
dimethylamine (in MeCN)	N-Nucleophile	MeCN	17.96	0.63	-134.282	-135.208	-0.926	-0.37	-0.227	0.143	0.159	0.045	-0.114	0.1055	0.091	-0.0145	0.529	0.272	-0.257	-0.1055	-0.091	0.0145	0.0105201	0.0152224	0.00470234	1.378	1.271	-0.107	-84198.2	-84783.6	-585.39	-84217.4	-84802.9	-585.529	-0.694	-0.667	0.027	45.0837	112.545	102.413	1.06335	6.584	1.20531	-132.801	-131.97	-0.831	-0.341	-0.475	0.134
adenine anion (in DMSO)	N-Nucleophile	DMSO	18	0.55	-464.153	-466.968	-2.815	-0.279	-0.195	0.084	0.151	0.002	-0.149	0.064	0.0965	0.0325	0.43	0.197	-0.233	-0.064	-0.0965	-0.0325	0.00476279	0.0236352	0.0188724	5.994	6.009	0.015	-291188	-292960	-1771.69	-291212	-292985	-1772.22	-0.729	-0.637	0.092	134.119	164.908	166.876	1.12521	8.784	1.98355	-553.272	-551.617	-1.655	-0.237	-0.369	0.132
proline (anionic, in water)	N-Nucleophile	Water	18.08	0.5	-398.397	-400.803	-2.406	-0.347	-0.198	0.149	0.165	0.049	-0.116	0.091	0.0745	-0.0165	0.512	0.247	-0.265	-0.091	-0.0745	0.0165	0.00808691	0.0112353	0.00314841	10.048	9.145	-0.903	-249905	-251420	-1515.46	-249930	-251445	-1515.54	-0.742	-0.721	0.021	114.123	159.948	167.443	1.08891	8.059	1.88199	-76.455	-76.055	-0.4	-0.304	-0.505	0.201
piperidine (in water)	N-Nucleophile	Water	18.13	0.44	-250.255	-251.978	-1.723	-0.366	-0.227	0.139	0.157	0.042	-0.115	0.1045	0.0925	-0.012	0.523	0.269	-0.254	-0.1045	-0.0925	0.012	0.01044	0.0159038	0.0054638	1.321	1.22	-0.101	-156927	-158015	-1087.62	-156949	-158037	-1087.95	-0.719	-0.692	0.027	85.1475	154.645	163.832	1.06822	7.333	1.58334	-76.455	-76.055	-0.4	-0.304	-0.505	0.201
perhydroazepine (in water)	N-Nucleophile	Water	18.29	0.46	-289.288	-291.292	-2.004	-0.357	-0.219	0.138	0.155	0.038	-0.117	0.101	0.0905	-0.0105	0.512	0.257	-0.255	-0.101	-0.0905	0.0105	0.00996191	0.0159343	0.00597242	1.296	1.223	-0.073	-181401	-182667	-1265.57	-181425	-182691	-1266.05	-0.728	-0.701	0.027	99.1741	171.677	189.869	1.07481	7.614	1.76469	-76.455	-76.055	-0.4	-0.304	-0.505	0.201
methanesulfonamide anion (in DMSO)	N-Nucleophile	DMSO	18.61	0.53	-642.002	-644.068	-2.066	-0.34	-0.198	0.142	0.175	0.061	-0.114	0.0825	0.0685	-0.014	0.515	0.259	-0.256	-0.0825	-0.0685	0.014	0.00660801	0.0090584	0.00245039	4.166	3.842	-0.324	-402817	-404117	-1299.85	-402839	-404139	-1300.33	-1.336	-1.246	0.09	94.113	123.255	114.112	1.08352	6.776	1.33208	-553.272	-551.617	-1.655	-0.237	-0.369	0.132
pyrrolidine (in MeCN)	N-Nucleophile	MeCN	18.64	0.6	-211.202	-212.645	-1.443	-0.369	-0.227	0.142	0.154	0.039	-0.115	0.1075	0.094	-0.0135	0.523	0.266	-0.257	-0.1075	-0.094	0.0135	0.011048	0.016609	0.00556098	1.411	1.287	-0.124	-132442	-133352	-910.58	-132463	-133373	-910.669	-0.717	-0.69	0.027	71.121	138.105	138.666	1.06615	6.604	1.40013	-132.801	-131.97	-0.831	-0.341	-0.475	0.134
N-methyl-piperidine (in MeCN)	N-Nucleophile	MeCN	18.72	0.52	-289.291	-291.296	-2.005	-0.352	-0.218	0.134	0.159	0.044	-0.115	0.0965	0.087	-0.0095	0.511	0.262	-0.249	-0.0965	-0.087	0.0095	0.00911179	0.0144447	0.00533287	0.854	0.665	-0.189	-181404	-182670	-1265.48	-181428	-182694	-1265.91	-0.581	-0.528	0.053	99.1741	174.445	190.866	1.08834	8.271	1.79685	-132.801	-131.97	-0.831	-0.341	-0.475	0.134
DABCO (in MeCN)	N-Nucleophile	MeCN	18.8	0.7	-342.958	-345.299	-2.341	-0.351	-0.165	0.186	0.124	-0.015	-0.139	0.1135	0.09	-0.0235	0.475	0.15	-0.325	-0.1135	-0.09	0.0235	0.0135603	0.027	0.0134397	2.961	2.738	-0.223	-215088	-216564	-1476.23	-215115	-216592	-1477.23	-0.392	-0.294	0.098	112.173	190.367	207.166	1.12453	8.707	1.99843	-132.801	-131.97	-0.831	-0.341	-0.475	0.134
N-methyl-piperidine (in CH2Cl2)	N-Nucleophile	Dichloromethane	18.9	0.52	-289.291	-291.296	-2.005	-0.351	-0.217	0.134	0.159	0.044	-0.115	0.096	0.0865	-0.0095	0.51	0.261	-0.249	-0.096	-0.0865	0.0095	0.00903529	0.0143338	0.00529852	0.795	0.607	-0.188	-181404	-182669	-1265.53	-181428	-182694	-1265.98	-0.579	-0.525	0.054	99.1741	174.451	190.911	1.0882	8.27	1.79673	-959.769	-958.05	-1.719	-0.317	-0.45	0.133
4-pyridone anion (in DMSO)	N-Nucleophile	DMSO	18.97	0.62	-321.154	-323.121	-1.967	-0.273	-0.181	0.092	0.163	0.016	-0.147	0.055	0.0825	0.0275	0.436	0.197	-0.239	-0.055	-0.0825	-0.0275	0.00346904	0.0172747	0.0138057	3.493	2.853	-0.64	-201470	-202708	-1237.83	-201491	-202729	-1238.17	-0.694	-0.604	0.09	94.0914	137.588	133.789	1.08782	7.287	1.69578	-553.272	-551.617	-1.655	-0.237	-0.369	0.132
benzimidazole anion (in DMSO)	N-Nucleophile	DMSO	19.13	0.55	-377.074	-379.482	-2.408	-0.268	-0.19	0.078	0.145	0.006	-0.139	0.0615	0.092	0.0305	0.413	0.196	-0.217	-0.0615	-0.092	-0.0305	0.004579	0.0215918	0.0170128	4.804	4.518	-0.286	-236543	-238059	-1515.81	-236565	-238082	-1516.23	-0.724	-0.643	0.081	117.128	163.096	166.758	1.11338	8.95	1.89832	-553.272	-551.617	-1.655	-0.237	-0.369	0.132
1,1-dimethyl-2-methylenehydrazine (in CH2Cl2)	N-Nucleophile	Dichloromethane	19.31	0.46	-227.151	-228.649	-1.498	-0.337	-0.218	0.119	0.156	0.002	-0.154	0.0905	0.108	0.0175	0.493	0.22	-0.273	-0.0905	-0.108	-0.0175	0.00830654	0.0265091	0.0182025	2.309	2.4	0.091	-142459	-143404	-944.566	-142481	-143426	-945.026	-0.284	-0.273	0.011	72.109	140.708	136.602	1.09716	7.656	1.52761	-959.769	-958.05	-1.719	-0.317	-0.45	0.133
2-pyridone anion (in DMSO)	N-Nucleophile	DMSO	19.91	0.6	-321.156	-323.122	-1.966	-0.258	-0.171	0.087	0.151	0.007	-0.144	0.0535	0.082	0.0285	0.409	0.178	-0.231	-0.0535	-0.082	-0.0285	0.00349908	0.0188876	0.0153886	8.057	7.187	-0.87	-201471	-202709	-1237.55	-201493	-202730	-1237.93	-0.733	-0.631	0.102	94.0914	137.826	133.882	1.0892	7.889	1.67777	-553.272	-551.617	-1.655	-0.237	-0.369	0.132
2-pyridone anion (in MeCN)	N-Nucleophile	MeCN	20.11	0.57	-321.155	-323.121	-1.966	-0.257	-0.17	0.087	0.152	0.008	-0.144	0.0525	0.081	0.0285	0.409	0.178	-0.231	-0.0525	-0.081	-0.0285	0.0033695	0.0184298	0.0150603	8.026	7.158	-0.868	-201471	-202708	-1237.58	-201492	-202730	-1237.96	-0.733	-0.63	0.103	94.0914	137.826	133.883	1.0892	7.889	1.67777	-132.801	-131.97	-0.831	-0.341	-0.475	0.134
4-pyridone anion (in MeCN)	N-Nucleophile	MeCN	20.22	0.49	-321.154	-323.121	-1.967	-0.272	-0.18	0.092	0.164	0.017	-0.147	0.054	0.0815	0.0275	0.436	0.197	-0.239	-0.054	-0.0815	-0.0275	0.00334404	0.0168585	0.0135145	3.48	2.842	-0.638	-201470	-202708	-1237.85	-201491	-202729	-1238.19	-0.694	-0.604	0.09	94.0914	137.588	133.788	1.08782	7.287	1.69578	-132.801	-131.97	-0.831	-0.341	-0.475	0.134
cyanamide anion (in DMSO)	N-Nucleophile	DMSO	20.33	0.64	-147.467	-148.352	-0.885	-0.295	-0.168	0.127	0.198	0.081	-0.117	0.0485	0.0435	-0.005	0.493	0.249	-0.244	-0.0485	-0.0435	0.005	0.00238565	0.0037997	0.00141405	2.721	2.891	0.17	-92520.4	-93076.8	-556.435	-92537.3	-93093.8	-556.52	-1.085	-0.994	0.091	41.032	78.3157	60.917	1.04619	5.775	1.06456	-553.272	-551.617	-1.655	-0.237	-0.369	0.132
azide ion (in DMSO)	N-Nucleophile	DMSO	20.5	0.59	-163.405	-164.364	-0.959	-0.284	-0.17	0.114	0.29	0.109	-0.181	-0.003	0.0305	0.0335	0.574	0.279	-0.295	0.003	-0.0305	-0.0335	7.83972e-06	0.00166711	0.00165927	0	0	0	-102528	-103131	-603.2	-102543	-103143	-599.841	-0.65	-0.579	0.071	42.0201	69.063	50.8582	1.04054	5.463	0.96484	-553.272	-551.617	-1.655	-0.237	-0.369	0.132
quinuclidine (in MeCN)	N-Nucleophile	MeCN	20.54	0.6	-327.156	-329.397	-2.241	-0.339	-0.211	0.128	0.148	0.033	-0.115	0.0955	0.089	-0.0065	0.487	0.244	-0.243	-0.0955	-0.089	0.0065	0.00936371	0.0162316	0.00686785	1.478	1.375	-0.103	-205160	-206573	-1413.62	-205182	-206597	-1415.2	-0.579	-0.53	0.049	111.185	174.016	197.407	1.06154	7.24	1.6683	-132.801	-131.97	-0.831	-0.341	-0.475	0.134
N-methyl-pyrrolidine (in MeCN)	N-Nucleophile	MeCN	20.59	0.52	-250.24	-251.964	-1.724	-0.353	-0.219	0.134	0.155	0.04	-0.115	0.099	0.0895	-0.0095	0.508	0.259	-0.249	-0.099	-0.0895	0.0095	0.00964665	0.0154638	0.00581715	0.922	0.716	-0.206	-156919	-158008	-1088.32	-156942	-158031	-1088.57	-0.576	-0.523	0.053	85.1475	158.824	166.295	1.08622	7.713	1.63382	-132.801	-131.97	-0.831	-0.341	-0.475	0.134
N-methyl-pyrrolidine (in CH2Cl2)	N-Nucleophile	Dichloromethane	20.6	0.52	-250.24	-251.964	-1.724	-0.352	-0.218	0.134	0.155	0.04	-0.115	0.0985	0.089	-0.0095	0.507	0.258	-0.249	-0.0985	-0.089	0.0095	0.00956829	0.0153508	0.00578248	0.862	0.66	-0.202	-156919	-158007	-1088.34	-156942	-158031	-1088.59	-0.574	-0.52	0.054	85.1475	158.834	166.301	1.08627	7.713	1.63372	-959.769	-958.05	-1.719	-0.317	-0.45	0.133
2,4-dimethyl-imidazole anion (in DMSO)	N-Nucleophile	DMSO	20.69	0.6	-302.474	-304.448	-1.974	-0.249	-0.164	0.085	0.178	0.069	-0.109	0.0355	0.0475	0.012	0.427	0.233	-0.194	-0.0355	-0.0475	-0.012	0.0014757	0.00484174	0.00336604	1.825	1.773	-0.052	-189725	-190969	-1243.43	-189749	-190993	-1243.97	-0.74	-0.666	0.074	95.1225	160.99	157.731	1.14054	8.784	1.81634	-553.272	-551.617	-1.655	-0.237	-0.369	0.132
2-methyl-imidazole anion (in DMSO)	N-Nucleophile	DMSO	21.03	0.5	-263.427	-265.12	-1.693	-0.256	-0.17	0.086	0.185	0.073	-0.112	0.0355	0.0485	0.013	0.441	0.243	-0.198	-0.0355	-0.0485	-0.013	0.00142885	0.00484002	0.00341117	1.061	1.062	0.001	-165242	-166308	-1066.09	-165264	-166330	-1066.44	-0.717	-0.652	0.065	81.0959	136.049	128.766	1.10344	7.695	1.53296	-553.272	-551.617	-1.655	-0.237	-0.369	0.132
imidazole anion (in DMSO)	N-Nucleophile	DMSO	21.09	0.51	-224.379	-225.791	-1.412	-0.265	-0.178	0.087	0.197	0.09	-0.107	0.034	0.044	0.01	0.462	0.268	-0.194	-0.034	-0.044	-0.01	0.00125108	0.00361194	0.00236086	1.59	1.521	-0.069	-140758	-141647	-888.951	-140777	-141666	-889.135	-0.697	-0.638	0.059	67.0693	110.301	99.7102	1.06091	6.57	1.23153	-553.272	-551.617	-1.655	-0.237	-0.369	0.132
4-methyl-imidazole anion (in DMSO)	N-Nucleophile	DMSO	21.29	0.51	-263.425	-265.119	-1.694	-0.256	-0.171	0.085	0.178	0.069	-0.109	0.039	0.051	0.012	0.434	0.24	-0.194	-0.039	-0.051	-0.012	0.0017523	0.00541875	0.00366645	4.01	3.92	-0.09	-165241	-166307	-1066.31	-165262	-166329	-1066.71	-0.716	-0.651	0.065	81.0959	135.216	128.642	1.09739	7.73	1.54961	-553.272	-551.617	-1.655	-0.237	-0.369	0.132
1,3-oxazolidin-2-one anion (in DMSO)	N-Nucleophile	DMSO	22.4	0.59	-320.292	-322.136	-1.844	-0.303	-0.179	0.124	0.176	0.064	-0.112	0.0635	0.0575	-0.006	0.479	0.243	-0.236	-0.0635	-0.0575	0.006	0.00420903	0.00680298	0.00259395	8.133	7.184	-0.949	-200933	-202094	-1160.68	-200954	-202115	-1160.91	-0.873	-0.771	0.102	86.0694	123.252	115.402	1.07541	7.015	1.49706	-553.272	-551.617	-1.655	-0.237	-0.369	0.132
1,1-dimethylhydrazine (in MeCN)	N-Nucleophile	MeCN	22.41	0.45	-189.289	-190.543	-1.254	-0.337	-0.202	0.135	0.156	0.039	-0.117	0.0905	0.0815	-0.009	0.493	0.241	-0.252	-0.0905	-0.0815	0.009	0.00830654	0.0137806	0.00547406	0.633	0.769	0.136	-118704	-119495	-791.632	-118725	-119517	-791.842	-0.67	-0.683	-0.013	60.0983	126.396	120.681	1.07044	6.579	1.33423	-132.801	-131.97	-0.831	-0.341	-0.475	0.134
(S)-4-benzyl-1,3-oxazolidin-2-one anion (in DMSO)	N-Nucleophile	DMSO	22.67	0.54	-588.936	-592.572	-3.636	-0.302	-0.182	0.12	0.134	-0.008	-0.142	0.084	0.095	0.011	0.436	0.174	-0.262	-0.084	-0.095	-0.011	0.00809174	0.0259339	0.0178422	15.271	14.611	-0.66	-369433	-371723	-2289.87	-369464	-371754	-2290.72	-0.883	-0.782	0.101	176.192	230.833	253.616	1.19152	11.132	2.88766	-553.272	-551.617	-1.655	-0.237	-0.369	0.132
trimethylamine (in MeCN)	N-Nucleophile	MeCN	23.05	0.45	-173.318	-174.526	-1.208	-0.354	-0.218	0.136	0.155	0.041	-0.114	0.0995	0.0885	-0.011	0.509	0.259	-0.25	-0.0995	-0.0885	0.011	0.0097252	0.0151202	0.00539498	0.918	0.718	-0.2	-108675	-109438	-763.299	-108695	-109459	-763.476	-0.559	-0.506	0.053	59.1103	132.337	129.476	1.06941	6.58	1.36287	-132.801	-131.97	-0.831	-0.341	-0.475	0.134
cysteine (dianionic, in water, S-nucleophile)	N-Nucleophile	Water	23.43	0.42	-718.545	-721.115	-2.57	-0.281	-0.175	0.106	0.186	0.056	-0.13	0.0475	0.0595	0.012	0.467	0.231	-0.236	-0.0475	-0.0595	-0.012	0.00241569	0.00766288	0.00524719	3.056	3.092	0.036	-450831	-452448	-1617.05	-450856	-452473	-1617.32	-0.884	-0.89	-0.006	119.142	152.144	153.59	1.09716	8.281	2.08972	-76.455	-76.055	-0.4	-0.304	-0.505	0.201
Trifluoroethanol	O-Nucleophile	Trifluoroethanol	1.11	0.96	-450.799	-452.905	-2.106	-0.476	-0.299	0.177	0.159	0.034	-0.125	0.1585	0.1325	-0.026	0.635	0.333	-0.302	-0.1585	-0.1325	0.026	0.0197813	0.0263607	0.00657944	4.267	4.012	-0.255	-282838	-284162	-1324.51	-282861	-284186	-1325.08	-0.768	-0.735	0.033	100.04	114.719	102.255	1.08501	6.937	1.51	-452.905	-450.799	-2.106	-0.299	-0.476	0.177
Water	O-Nucleophile	Water	5.2	0.89	-76.055	-76.455	-0.4	-0.505	-0.304	0.201	0.164	0.04	-0.124	0.1705	0.132	-0.0385	0.669	0.344	-0.325	-0.1705	-0.132	0.0385	0.0217266	0.0253256	0.00359894	2.356	2.301	-0.055	-47708.3	-47960.3	-252.015	-47721.7	-47973.8	-252.057	-0.927	-0.916	0.011	18.015	52.484	35.05	1.0135	3.91	0.315	-76.455	-76.055	-0.4	-0.304	-0.505	0.201
Ethanol	O-Nucleophile	Ethanol	7.44	0.9	-154.131	-155.093	-0.962	-0.44	-0.273	0.167	0.16	0.043	-0.117	0.14	0.115	-0.025	0.6	0.316	-0.284	-0.14	-0.115	0.025	0.0163333	0.0209256	0.0045923	2.08	1.964	-0.116	-96662	-97268.9	-606.91	-96681.1	-97288.1	-607.073	-0.792	-0.758	0.034	46.068	106.507	94.262	1.06351	6.475	1.193	-155.093	-154.131	-0.962	-0.273	-0.44	0.167
Methanol	O-Nucleophile	Methanol	7.54	0.92	-115.081	-115.763	-0.682	-0.448	-0.275	0.173	0.163	0.045	-0.118	0.1425	0.115	-0.0275	0.611	0.32	-0.291	-0.1425	-0.115	0.0275	0.0166172	0.0206641	0.00404684	2.124	2.007	-0.117	-72177.6	-72607.3	-429.664	-72194.5	-72624.2	-429.731	-0.776	-0.741	0.035	32.042	81.84	65.684	1.03972	5.227	0.845	-115.762	-115.081	-0.681	-0.275	-0.448	0.173
Hydroxide	O-Nucleophile	Water	10.47	0.61	-75.499	-75.9	-0.401	-0.307	-0.117	0.19	0.226	0.109	-0.117	0.0405	0.004	-0.0365	0.533	0.226	-0.307	-0.0405	-0.004	0.0365	0.0015387	3.53982e-05	-0.0015033	1.847	1.679	-0.168	-47368.7	-47620.7	-251.935	-47381	-47633	-251.964	-1.34	-1.324	0.016	17.007	45.413	28.411	1.00874	3.69	0.229	-76.455	-76.055	-0.4	-0.304	-0.505	0.201
Dimethyl Sulfoxide	O-Nucleophile	DMSO	11.3	0.74	-417.952	-420.468	-2.516	-0.327	-0.206	0.121	0.125	-0.015	-0.14	0.101	0.1105	0.0095	0.452	0.191	-0.261	-0.101	-0.1105	-0.0095	0.0112843	0.031964	0.0206797	12.091	11.276	-0.815	-262196	-263779	-1583.23	-262221	-263804	-1583.57	-0.903	-0.805	0.098	121.113	164.509	168.078	1.11713	8.82	2.104	-553.272	-551.617	-1.655	-0.237	-0.369	0.132
Benzoate	O-Nucleophile	MeCN	11.3	0.72	-551.617	-553.272	-1.655	-0.369	-0.237	0.132	0.154	0.028	-0.126	0.1075	0.1045	-0.003	0.523	0.265	-0.258	-0.1075	-0.1045	0.003	0.011048	0.0206042	0.00955621	6.085	5.485	-0.6	-346088	-347130	-1042.31	-346109	-347152	-1042.82	-1.102	-0.994	0.108	78.133	127.03	121.225	1.07259	6.991	1.323	-132.801	-131.97	-0.831	-0.341	-0.475	0.134
Acetate	O-Nucleophile	Acetone	12.5	0.6	-227.392	-228.675	-1.283	-0.359	-0.19	0.169	0.188	0.077	-0.111	0.0855	0.0565	-0.029	0.547	0.267	-0.28	-0.0855	-0.0565	0.029	0.00668213	0.005978	-0.000704134	4.886	4.263	-0.623	-142655	-143462	-807.388	-142675	-143483	-807.487	-0.919	-0.822	0.097	59.044	100.242	86.032	1.06381	5.98	1.257	-193.219	-192.02	-1.199	-0.257	-0.413	0.156
2,2,2-Trifluoroethanolate	O-Nucleophile	Water	12.66	0.59	-450.278	-452.393	-2.115	-0.318	-0.159	0.159	0.202	0.083	-0.119	0.058	0.038	-0.02	0.52	0.242	-0.278	-0.058	-0.038	0.02	0.00323462	0.00298347	-0.000251144	6.671	6.2	-0.471	-282521	-283851	-1330.16	-282543	-283873	-1330.62	-1.05	-0.967	0.083	99.032	109.682	96.516	1.0781	6.591	1.512	-76.455	-76.055	-0.4	-0.304	-0.505	0.201
Bromite	O-Nucleophile	Water	12.75	0.59	-2722.04	-2724.59	-2.557	-0.311	-0.161	0.15	0.18	0.01	-0.17	0.0655	0.0755	0.01	0.491	0.171	-0.32	-0.0655	-0.0755	-0.01	0.00436889	0.0166674	0.0122985	5.19	4.652	-0.538	-1.7081e+06	-1.7097e+06	-1604.17	-1.70812e+06	-1.70972e+06	-1604.27	-1.02	-0.969	0.051	111.903	84.142	67.697	1.04767	5.973	0.9	-76.455	-76.055	-0.4	-0.304	-0.505	0.201
Cumene peroxy anion	O-Nucleophile	Water	13.92	0.61	-497.03	-500.165	-3.135	-0.3	-0.133	0.167	0.137	-0.006	-0.143	0.0815	0.0695	-0.012	0.437	0.127	-0.31	-0.0815	-0.0695	0.012	0.00759983	0.0190167	0.0114169	13.34	13.048	-0.292	-311765	-313740	-1974.85	-311794	-313770	-1975.15	-0.743	-0.743	0	151.182	211.078	234.746	1.14718	10.194	2.381	-76.455	-76.055	-0.4	-0.304	-0.505	0.201
Beta-piperidinium-peroxypropionate	O-Nucleophile	Water	13.94	0.62	-590.053	-594.352	-4.299	-0.352	-0.172	0.18	0.134	0.01	-0.124	0.109	0.081	-0.028	0.486	0.182	-0.304	-0.109	-0.081	0.028	0.0122233	0.0180247	0.00580147	28.053	27.609	-0.444	-370532	-372805	-2273.37	-370564	-372838	-2273.98	-0.653	-0.672	-0.019	173.21	234.675	265.489	1.17497	12.597	3.1	-76.455	-76.055	-0.4	-0.304	-0.505	0.201
Peroxy-beta-alanate	O-Nucleophile	Water	14.07	0.56	-396.708	-398.958	-2.25	-0.352	-0.171	0.181	0.125	0.002	-0.123	0.1135	0.0845	-0.029	0.477	0.173	-0.304	-0.1135	-0.0845	0.029	0.0135034	0.0206366	0.00713315	26.27	25.806	-0.464	-248856	-250273	-1416.82	-248882	-250299	-1417.03	-0.652	-0.672	-0.02	105.093	154.892	150.896	1.13023	9.626	2.152	-76.455	-76.055	-0.4	-0.304	-0.505	0.201
t-Butylperoxy anion	O-Nucleophile	Water	14.29	0.51	-306.482	-308.385	-1.903	-0.295	-0.126	0.169	0.168	0.055	-0.113	0.0635	0.0355	-0.028	0.463	0.181	-0.282	-0.0635	-0.0355	0.028	0.00435448	0.00348135	-0.000873128	8.661	8.263	-0.398	-192232	-193431	-1199.37	-192256	-193455	-1199.88	-0.758	-0.759	-0.001	89.113	149.545	153.646	1.07815	7.273	1.627	-76.455	-76.055	-0.4	-0.304	-0.505	0.201
p-Methylphenolate	O-Nucleophile	Water	14.3	0.62	-344.183	-346.392	-2.209	-0.234	-0.153	0.081	0.156	0.019	-0.137	0.039	0.067	0.028	0.39	0.172	-0.218	-0.039	-0.067	-0.028	0.00195	0.0130494	0.0110994	9.568	8.623	-0.945	-215894	-217285	-1390.86	-215919	-217310	-1391.18	-0.947	-0.838	0.109	107.13	167.036	171.094	1.12092	8.925	2.007	-76.455	-76.055	-0.4	-0.304	-0.505	0.201
p-Nitrophenolate	O-Nucleophile	DMSO	14.32	0.77	-508.691	-511.652	-2.961	-0.268	-0.191	0.077	0.086	-0.063	-0.149	0.091	0.127	0.036	0.354	0.128	-0.226	-0.091	-0.127	-0.036	0.0116963	0.0630039	0.0513076	2.252	1.35	-0.902	-319140	-321002	-1861.82	-319166	-321028	-1862.41	-0.838	-0.73	0.108	138.101	166.497	169.473	1.12442	9.281	2.301	-553.272	-551.617	-1.655	-0.237	-0.369	0.132
Peroxy-GABA	O-Nucleophile	Water	14.33	0.57	-435.753	-438.283	-2.53	-0.347	-0.167	0.18	0.126	0.002	-0.124	0.1105	0.0825	-0.028	0.473	0.169	-0.304	-0.1105	-0.0825	0.028	0.0129072	0.0201368	0.00722959	31.817	31.244	-0.573	-273337	-274931	-1593.8	-273365	-274960	-1594.54	-0.662	-0.68	-0.018	119.119	177.337	178.903	1.15516	10.883	2.521	-76.455	-76.055	-0.4	-0.304	-0.505	0.201
Peroxomonosulfate	O-Nucleophile	Water	14.41	0.6	-772.002	-774.552	-2.55	-0.346	-0.147	0.199	0.288	0.088	-0.2	0.029	0.0295	0.0005	0.634	0.235	-0.399	-0.029	-0.0295	-0.0005	0.000663249	0.0018516	0.00118835	2.385	3.148	0.763	-484422	-486024	-1601.22	-484444	-486046	-1601.64	-0.652	-0.708	-0.056	112.062	109.03	94.638	1.08582	6.816	1.456	-76.455	-76.055	-0.4	-0.304	-0.505	0.201
Hypochlorite	O-Nucleophile	Water	14.5	0.58	-534.405	-535.512	-1.107	-0.347	-0.168	0.179	0.188	0.007	-0.181	0.0795	0.0805	0.001	0.535	0.175	-0.36	-0.0795	-0.0805	-0.001	0.00590678	0.018515	0.0126082	2.681	3.094	0.413	-335341	-336036	-694.678	-335357	-336051	-694.669	-0.824	-0.877	-0.053	51.452	67.498	49.883	1.03018	5.055	0.826	-76.455	-76.055	-0.4	-0.304	-0.505	0.201
3,5-Dinitrobenzoate	O-Nucleophile	MeCN	14.96	0.71	-825.008	-829.59	-4.582	-0.37	-0.223	0.147	0.042	-0.107	-0.149	0.164	0.165	0.001	0.412	0.116	-0.296	-0.164	-0.165	-0.001	0.0326408	0.117349	0.0847084	11.002	10.538	-0.464	-517619	-520501	-2881.01	-517653	-520535	-2881.69	-0.885	-0.782	0.103	211.109	208.817	221.441	1.17991	10.136	2.874	-132.801	-131.97	-0.831	-0.341	-0.475	0.134
p-Nitrophenolate	O-Nucleophile	DMF	15.05	0.8	-508.691	-511.651	-2.96	-0.267	-0.19	0.077	0.087	-0.062	-0.149	0.09	0.126	0.036	0.354	0.128	-0.226	-0.09	-0.126	-0.036	0.0114407	0.0620156	0.0505749	2.262	1.344	-0.918	-319140	-321002	-1861.83	-319166	-321028	-1862.43	-0.838	-0.729	0.109	138.101	166.497	169.47	1.12443	9.281	2.301	-248.592	-247.066	-1.526	-0.25	-0.375	0.125
p-Nitrophenolate	O-Nucleophile	MeCN	15.14	0.82	-508.691	-511.651	-2.96	-0.267	-0.19	0.077	0.087	-0.062	-0.149	0.09	0.126	0.036	0.354	0.128	-0.226	-0.09	-0.126	-0.036	0.0114407	0.0620156	0.0505749	2.264	1.336	-0.928	-319140	-321002	-1861.84	-319166	-321028	-1862.43	-0.838	-0.729	0.109	138.101	166.5	169.473	1.12444	9.281	2.301	-132.801	-131.97	-0.831	-0.341	-0.475	0.134
p-Nitrobenzoate	O-Nucleophile	MeCN	15.3	0.76	-621.482	-625.032	-3.55	-0.351	-0.215	0.136	0.054	-0.096	-0.15	0.1485	0.1555	0.007	0.405	0.119	-0.286	-0.1485	-0.1555	-0.007	0.027225	0.101598	0.0743727	10.949	10.362	-0.587	-389909	-392142	-2232.41	-389939	-392172	-2233.11	-0.89	-0.79	0.1	166.111	186.557	194.671	1.14868	10.303	2.717	-132.801	-131.97	-0.831	-0.341	-0.475	0.134
Dioxidanide	O-Nucleophile	Water	15.4	0.55	-150.304	-151.076	-0.772	-0.303	-0.116	0.187	0.208	0.081	-0.127	0.0475	0.0175	-0.03	0.511	0.197	-0.314	-0.0475	-0.0175	0.03	0.00220768	0.000777284	-0.0014304	3.026	3.089	0.063	-94305.8	-94791.1	-485.304	-94321.8	-94807.2	-485.404	-0.758	-0.786	-0.028	33.007	60.312	42.004	1.03228	4.654	0.78	-76.455	-76.055	-0.4	-0.304	-0.505	0.201
o-Nitrophenolate	O-Nucleophile	DMSO	15.48	0.71	-508.682	-511.642	-2.96	-0.268	-0.189	0.079	0.087	-0.061	-0.148	0.0905	0.125	0.0345	0.355	0.128	-0.227	-0.0905	-0.125	-0.0345	0.0115356	0.0610352	0.0494996	8.003	7.404	-0.599	-319135	-320996	-1861.52	-319160	-321023	-1862.77	-0.825	-0.716	0.109	138.101	166.17	169.527	1.12197	8.801	2.105	-553.272	-551.617	-1.655	-0.237	-0.369	0.132
Methanolate	O-Nucleophile	Methanol	15.78	0.56	-114.535	-115.226	-0.691	-0.289	-0.134	0.155	0.189	0.074	-0.115	0.05	0.03	-0.02	0.478	0.208	-0.27	-0.05	-0.03	0.02	0.00261506	0.00216346	-0.000451601	3.224	2.368	-0.856	-71845.3	-72280.9	-435.683	-71861	-72296.7	-435.712	-1.082	-0.981	0.101	31.034	76.332	59.635	1.03426	4.831	0.799	-115.762	-115.081	-0.681	-0.275	-0.448	0.173
Ethanolate	O-Nucleophile	Ethanol	15.78	0.65	-153.585	-154.558	-0.973	-0.287	-0.136	0.151	0.187	0.073	-0.114	0.05	0.0315	-0.0185	0.474	0.209	-0.265	-0.05	-0.0315	0.0185	0.00263713	0.0023738	-0.000263327	5.26	4.41	-0.85	-96329.6	-96943.4	-613.789	-96348.1	-96962	-613.938	-1.092	-0.991	0.101	45.061	101.274	88.425	1.05529	6.102	1.177	-155.093	-154.131	-0.962	-0.273	-0.44	0.167
o-Nitrophenolate	O-Nucleophile	MeCN	15.83	0.8	-508.682	-511.641	-2.959	-0.267	-0.188	0.079	0.088	-0.06	-0.148	0.0895	0.124	0.0345	0.355	0.128	-0.227	-0.0895	-0.124	-0.0345	0.011282	0.0600625	0.0487805	7.971	7.371	-0.6	-319134	-320996	-1861.55	-319160	-321023	-1862.67	-0.824	-0.715	0.109	138.101	166.174	169.529	1.12199	8.801	2.105	-132.801	-131.97	-0.831	-0.341	-0.475	0.134
Phthalimidoperoxyhexanoate	O-Nucleophile	Water	16.02	0.54	-967.378	-973.136	-5.758	-0.343	-0.163	0.18	0.057	-0.09	-0.147	0.143	0.1265	-0.0165	0.4	0.073	-0.327	-0.143	-0.1265	0.0165	0.0255613	0.109604	0.0840432	38.939	38.14	-0.799	-606851	-610475	-3624.72	-606893	-610519	-3626.04	-0.67	-0.687	-0.017	276.265	331.402	337.827	1.41302	17.549	4.61	-76.455	-76.055	-0.4	-0.304	-0.505	0.201
Methyl carbonate	O-Nucleophile	MeCN	16.03	0.64	-302.29	-303.931	-1.641	-0.379	-0.207	0.172	0.184	0.074	-0.11	0.0975	0.0665	-0.031	0.563	0.281	-0.282	-0.0975	-0.0665	0.031	0.0084425	0.00786877	-0.000573723	6.56	5.75	-0.81	-189650	-190682	-1032.25	-189671	-190704	-1032.74	-0.913	-0.815	0.098	75.043	110.533	97.312	1.08053	6.966	1.435	-132.801	-131.97	-0.831	-0.341	-0.475	0.134
n-Propanolate	O-Nucleophile	Propanol	16.03	0.7	-192.628	-193.881	-1.253	-0.285	-0.133	0.152	0.178	0.065	-0.113	0.0535	0.034	-0.0195	0.463	0.198	-0.265	-0.0535	-0.034	0.0195	0.00309098	0.00291919	-0.000171791	8.229	7.455	-0.774	-120810	-121601	-790.732	-120831	-121622	-791.038	-1.092	-0.996	0.096	59.087	123.534	116.358	1.07196	7.35	1.561	-194.417	-193.175	-1.242	-0.273	-0.44	0.167
o-Nitrophenolate	O-Nucleophile	DMF	16.65	0.7	-508.682	-511.641	-2.959	-0.267	-0.188	0.079	0.088	-0.061	-0.149	0.0895	0.1245	0.035	0.355	0.127	-0.228	-0.0895	-0.1245	-0.035	0.011282	0.0610246	0.0497426	7.976	7.377	-0.599	-319134	-320996	-1861.54	-319160	-321023	-1862.83	-0.824	-0.715	0.109	138.101	166.173	169.533	1.12197	8.801	2.105	-248.592	-247.066	-1.526	-0.25	-0.375	0.125
Hypobromite	O-Nucleophile	Water	16.69	0.46	-2647.28	-2649.45	-2.166	-0.329	-0.165	0.164	0.168	-0.002	-0.17	0.0805	0.0835	0.003	0.497	0.163	-0.334	-0.0805	-0.0835	-0.003	0.00651937	0.0213873	0.0148679	4.241	4.643	0.402	-1.66119e+06	-1.66255e+06	-1359.15	-1.66121e+06	-1.66257e+06	-1359.14	-0.892	-0.933	-0.041	95.903	73.789	57.094	1.02925	5.259	0.704	-76.455	-76.055	-0.4	-0.304	-0.505	0.201
(Z)-2-Phenyl-1-(1,3,4-triphenyl-4H-1,2,4-triazol-1-ium-5-yl)prop-1-en-1-olate	O-Nucleophile	THF	16.73	0.63	-1350.03	-1358.71	-8.678	-0.252	-0.173	0.079	0.084	-0.062	-0.146	0.084	0.1175	0.0335	0.336	0.111	-0.225	-0.084	-0.1175	-0.0335	0.0105	0.0621903	0.0516903	11.108	10.897	-0.211	-846841	-852305	-5464.07	-846894	-852360	-5466.09	-0.887	-0.731	0.156	429.512	494.143	614.307	1.41422	17.117	4.175	-232.511	-231.032	-1.479	-0.246	-0.404	0.158
Benzoate	O-Nucleophile	MeCN	16.82	0.7	-417.952	-420.468	-2.516	-0.327	-0.206	0.121	0.125	-0.015	-0.14	0.101	0.1105	0.0095	0.452	0.191	-0.261	-0.101	-0.1105	-0.0095	0.0112843	0.031964	0.0206797	12.092	11.277	-0.815	-262196	-263779	-1583.23	-262221	-263804	-1583.52	-0.903	-0.805	0.098	121.113	164.511	168.08	1.11714	8.82	2.104	-132.801	-131.97	-0.831	-0.341	-0.475	0.134
Acetate	O-Nucleophile	MeCN	16.9	0.75	-227.395	-228.678	-1.283	-0.363	-0.194	0.169	0.186	0.074	-0.112	0.0885	0.06	-0.0285	0.549	0.268	-0.281	-0.0885	-0.06	0.0285	0.0071332	0.00671642	-0.000416779	4.924	4.303	-0.621	-142657	-143464	-807.326	-142677	-143484	-807.423	-0.92	-0.823	0.097	59.044	100.241	86.027	1.06384	5.98	1.2567	-132.801	-131.97	-0.831	-0.341	-0.475	0.134
Isopropanolate	O-Nucleophile	Propan-2-ol	17.03	0.5	-192.632	-193.887	-1.255	-0.284	-0.137	0.147	0.183	0.069	-0.114	0.0505	0.034	-0.0165	0.467	0.206	-0.261	-0.0505	-0.034	0.0165	0.00273046	0.00280583	7.53649e-05	5.662	4.835	-0.827	-120813	-121605	-791.514	-120834	-121626	-791.848	-1.1	-1.001	0.099	59.087	123.132	116.285	1.06892	6.718	1.3688	-194.423	-193.18	-1.243	-0.273	-0.435	0.162
4-Nitroperoxybenzoate	O-Nucleophile	Water	17.43	0.5	-696.235	-700.156	-3.921	-0.348	-0.177	0.171	0.043	-0.104	-0.147	0.1525	0.1405	-0.012	0.391	0.073	-0.318	-0.1525	-0.1405	0.012	0.0297395	0.135207	0.105468	14.704	13.336	-1.368	-436814	-439280	-2465.38	-436845	-439311	-2465.58	-0.645	-0.63	0.015	182.11	198.909	207.113	1.17518	11.629	2.95	-76.455	-76.055	-0.4	-0.304	-0.505	0.201
4-Methoxyperoxybenzoate	O-Nucleophile	Water	17.84	0.46	-606.621	-610.151	-3.53	-0.315	-0.166	0.149	0.117	-0.026	-0.143	0.099	0.096	-0.003	0.432	0.14	-0.292	-0.099	-0.096	0.003	0.0113438	0.0329143	0.0215705	20.653	20.28	-0.373	-380561	-382782	-2220.55	-380591	-382813	-2221.13	-0.655	-0.667	-0.012	167.139	209.181	219.537	1.18879	12.212	2.831	-76.455	-76.055	-0.4	-0.304	-0.505	0.201
p-Cyanophenolate	O-Nucleophile	DMF	17.85	0.71	-396.915	-399.353	-2.438	-0.256	-0.178	0.078	0.143	-0.004	-0.147	0.0565	0.091	0.0345	0.399	0.174	-0.225	-0.0565	-0.091	-0.0345	0.00400031	0.023796	0.0197957	2.357	1.55	-0.807	-249003	-250536	-1533.53	-249027	-250561	-1534	-0.874	-0.768	0.106	118.113	164.662	165.2	1.13112	9.797	2.2357	-248.592	-247.066	-1.526	-0.25	-0.375	0.125
3,5-Dichloroperoxybenzoate	O-Nucleophile	Water	17.93	0.5	-1410.55	-1414.84	-4.286	-0.345	-0.174	0.171	0.085	-0.054	-0.139	0.13	0.114	-0.016	0.43	0.12	-0.31	-0.13	-0.114	0.016	0.0196512	0.05415	0.0344988	17.424	16.611	-0.813	-885069	-887763	-2694.04	-885099	-887794	-2694.53	-0.644	-0.646	-0.002	206.003	208.061	217.579	1.18951	10.817	2.893	-76.455	-76.055	-0.4	-0.304	-0.505	0.201
4-Fluoroperoxybenzoate	O-Nucleophile	Water	17.99	0.47	-591.58	-594.855	-3.275	-0.337	-0.173	0.164	0.114	-0.034	-0.148	0.1115	0.1035	-0.008	0.451	0.139	-0.312	-0.1115	-0.1035	0.008	0.013783	0.0385333	0.0247503	11.811	11.384	-0.427	-371151	-373210	-2059	-371179	-373238	-2059.47	-0.655	-0.671	-0.016	155.103	176.087	181.802	1.13479	9.472	2.4688	-76.455	-76.055	-0.4	-0.304	-0.505	0.201
3-Chloroperoxybenzoate	O-Nucleophile	Water	18.19	0.47	-951.631	-955.217	-3.586	-0.338	-0.171	0.167	0.095	-0.045	-0.14	0.1215	0.108	-0.0135	0.433	0.126	-0.307	-0.1215	-0.108	0.0135	0.0170465	0.0462857	0.0292392	16.959	16.159	-0.8	-597087	-599342	-2254.65	-597115	-599370	-2255.32	-0.649	-0.653	-0.004	171.558	192.572	199.136	1.16793	10.814	2.7	-76.455	-76.055	-0.4	-0.304	-0.505	0.201
p-Chlorophenolate	O-Nucleophile	MeCN	18.32	0.82	-764.066	-766.693	-2.627	-0.244	-0.162	0.082	0.149	0.01	-0.139	0.0475	0.076	0.0285	0.393	0.172	-0.221	-0.0475	-0.076	-0.0285	0.00287055	0.0167907	0.0139202	7.641	6.934	-0.707	-479400	-481051	-1651.62	-479423	-481076	-1652.54	-0.921	-0.814	0.107	127.548	160.394	161.716	1.11757	9.198	2.188	-132.801	-131.97	-0.831	-0.341	-0.475	0.134
o-(Trifluoromethyl)phenolate	O-Nucleophile	MeCN	18.39	0.69	-640.862	-644.217	-3.355	-0.253	-0.171	0.082	0.144	0	-0.144	0.0545	0.0855	0.031	0.397	0.171	-0.226	-0.0545	-0.0855	-0.031	0.00374087	0.021375	0.0176341	6.258	5.536	-0.722	-402077	-404186	-2109.45	-402103	-404214	-2110.2	-0.903	-0.795	0.108	161.101	173.557	178.477	1.13234	8.722	2.1716	-132.801	-131.97	-0.831	-0.341	-0.475	0.134
2-Carboperoxybenzoate	O-Nucleophile	Water	18.43	0.46	-679.893	-683.74	-3.847	-0.327	-0.159	0.168	0.125	-0.015	-0.14	0.101	0.087	-0.014	0.452	0.144	-0.308	-0.101	-0.087	0.014	0.0112843	0.0262812	0.014997	18.325	17.269	-1.056	-426560	-428979	-2419.14	-426590	-429010	-2419.74	-0.67	-0.69	-0.02	180.114	201.946	211.576	1.17629	10.146	2.449	-76.455	-76.055	-0.4	-0.304	-0.505	0.201
o-(Trifluoromethyl)phenolate	O-Nucleophile	DMSO	18.47	0.61	-640.863	-644.217	-3.354	-0.254	-0.172	0.082	0.143	-0.001	-0.144	0.0555	0.0865	0.031	0.397	0.171	-0.226	-0.0555	-0.0865	-0.031	0.00387941	0.0218779	0.0179985	6.286	5.562	-0.724	-402077	-404187	-2109.43	-402104	-404214	-2110.18	-0.903	-0.796	0.107	161.101	173.557	178.476	1.13234	8.722	2.1716	-553.272	-551.617	-1.655	-0.237	-0.369	0.132
Phenolate	O-Nucleophile	MeCN	18.53	0.85	-305.139	-307.065	-1.926	-0.238	-0.156	0.082	0.161	0.022	-0.139	0.0385	0.067	0.0285	0.399	0.178	-0.221	-0.0385	-0.067	-0.0285	0.00185746	0.0126096	0.0107521	6.748	5.908	-0.84	-191413	-192626	-1212.76	-191435	-192648	-1213.14	-0.936	-0.829	0.107	93.103	144.494	142.933	1.09316	7.978	1.724	-132.801	-131.97	-0.831	-0.341	-0.475	0.134
3-Chloro-4-methoxyperoxybenzoate	O-Nucleophile	Water	18.56	0.48	-1065.54	-1069.77	-4.23	-0.321	-0.168	0.153	0.11	-0.034	-0.144	0.1055	0.101	-0.0045	0.431	0.134	-0.297	-0.1055	-0.101	0.0045	0.0129121	0.0380634	0.0251513	21.03	20.708	-0.322	-668543	-671203	-2659.95	-668575	-671235	-2660.62	-0.652	-0.661	-0.009	201.584	224.055	237.771	1.20736	12.197	2.9387	-76.455	-76.055	-0.4	-0.304	-0.505	0.201
Peroxybenzoate	O-Nucleophile	Water	18.57	0.43	-492.709	-495.595	-2.886	-0.335	-0.168	0.167	0.105	-0.036	-0.141	0.115	0.102	-0.013	0.44	0.132	-0.308	-0.115	-0.102	0.013	0.0150284	0.0394091	0.0243807	15.76	14.956	-0.804	-309103	-310919	-1815.41	-309130	-310945	-1815.86	-0.655	-0.661	-0.006	137.113	176.988	180.627	1.14554	10.187	2.331	-76.455	-76.055	-0.4	-0.304	-0.505	0.201
p-Nitrobenzoate	O-Nucleophile	Acetone	18.74	0.68	-621.48	-625.03	-3.55	-0.349	-0.212	0.137	0.056	-0.094	-0.15	0.1465	0.153	0.0065	0.405	0.118	-0.287	-0.1465	-0.153	-0.0065	0.0264966	0.0991907	0.0726941	10.871	10.274	-0.597	-389908	-392140	-2232.51	-389938	-392171	-2232.84	-0.889	-0.789	0.1	166.111	186.557	194.68	1.14865	10.302	2.717	-193.219	-192.02	-1.199	-0.257	-0.413	0.156
p-Cyanophenolate	O-Nucleophile	DMSO	18.78	0.57	-396.916	-399.354	-2.438	-0.256	-0.179	0.077	0.142	-0.005	-0.147	0.057	0.092	0.035	0.398	0.174	-0.224	-0.057	-0.092	-0.035	0.00408166	0.0243218	0.0202402	2.372	1.562	-0.81	-249003	-250537	-1533.51	-249028	-250562	-1533.98	-0.875	-0.768	0.107	118.113	164.662	165.203	1.13111	9.797	2.2356	-553.272	-551.617	-1.655	-0.237	-0.369	0.132
3,5-Dinitrobenzoate	O-Nucleophile	Acetone	18.8	0.62	-825.006	-829.588	-4.582	-0.368	-0.22	0.148	0.044	-0.105	-0.149	0.162	0.1625	0.0005	0.412	0.115	-0.297	-0.162	-0.1625	-0.0005	0.0318495	0.11481	0.0829603	10.915	10.444	-0.471	-517618	-520499	-2881.13	-517652	-520534	-2881.88	-0.884	-0.781	0.103	211.108	208.821	221.434	1.17996	10.136	2.8739	-193.219	-192.02	-1.199	-0.257	-0.413	0.156
m-Methoxyphenolate	O-Nucleophile	MeCN	18.81	0.8	-419.053	-421.621	-2.568	-0.243	-0.158	0.085	0.167	0.026	-0.141	0.038	0.066	0.028	0.41	0.184	-0.226	-0.038	-0.066	-0.028	0.00176098	0.011837	0.010076	11.43	10.632	-0.798	-262872	-264488	-1616.7	-262897	-264514	-1617.27	-0.93	-0.827	0.103	123.129	176.445	181.721	1.13744	9.509	2.1698	-132.801	-131.97	-0.831	-0.341	-0.475	0.134
Phenolate	O-Nucleophile	DMF	18.86	0.89	-305.139	-307.066	-1.927	-0.239	-0.156	0.083	0.161	0.021	-0.14	0.039	0.0675	0.0285	0.4	0.177	-0.223	-0.039	-0.0675	-0.0285	0.00190125	0.0128708	0.0109695	6.752	5.912	-0.84	-191413	-192626	-1212.76	-191435	-192648	-1213.13	-0.936	-0.829	0.107	93.103	144.494	142.933	1.09316	7.978	1.724	-248.592	-247.066	-1.526	-0.25	-0.375	0.125
p-(Trifluoromethyl)phenolate	O-Nucleophile	DMSO	18.98	0.63	-640.862	-644.218	-3.356	-0.255	-0.174	0.081	0.152	0.009	-0.143	0.0515	0.0825	0.031	0.407	0.183	-0.224	-0.0515	-0.0825	-0.031	0.00325829	0.0185963	0.015338	9.211	8.28	-0.931	-402077	-404187	-2109.54	-402103	-404216	-2113.27	-0.901	-0.792	0.109	161.101	174.446	178.725	1.13708	9.303	2.41	-553.272	-551.617	-1.655	-0.237	-0.369	0.132
p-Methylphenolate	O-Nucleophile	DMSO	19.08	0.87	-344.182	-346.391	-2.209	-0.232	-0.152	0.08	0.157	0.02	-0.137	0.0375	0.066	0.0285	0.389	0.172	-0.217	-0.0375	-0.066	-0.0285	0.00180752	0.0126628	0.0108553	9.527	8.583	-0.944	-215894	-217285	-1390.89	-215919	-217310	-1391.18	-0.946	-0.837	0.109	107.13	167.035	171.075	1.121	8.925	2.007	-553.272	-551.617	-1.655	-0.237	-0.369	0.132
p-Cyanophenolate	O-Nucleophile	MeCN	19.58	0.59	-396.915	-399.353	-2.438	-0.255	-0.178	0.077	0.143	-0.004	-0.147	0.056	0.091	0.035	0.398	0.174	-0.224	-0.056	-0.091	-0.035	0.0039397	0.023796	0.0198563	2.353	1.547	-0.806	-249003	-250536	-1533.53	-249027	-250561	-1534.01	-0.874	-0.768	0.106	118.113	164.662	165.2	1.13113	9.797	2.2357	-132.801	-131.97	-0.831	-0.341	-0.475	0.134
p-Methylphenolate	O-Nucleophile	DMF	19.65	0.85	-344.181	-346.39	-2.209	-0.231	-0.151	0.08	0.158	0.021	-0.137	0.0365	0.065	0.0285	0.389	0.172	-0.217	-0.0365	-0.065	-0.0285	0.0017124	0.012282	0.0105696	9.5	8.557	-0.943	-215893	-217284	-1390.92	-215918	-217310	-1391.14	-0.946	-0.836	0.11	107.13	167.035	171.089	1.12094	8.925	2.007	-248.592	-247.066	-1.526	-0.25	-0.375	0.125
p-Chlorophenolate	O-Nucleophile	DMF	19.67	0.72	-764.066	-766.693	-2.627	-0.244	-0.162	0.082	0.149	0.009	-0.14	0.0475	0.0765	0.029	0.393	0.171	-0.222	-0.0475	-0.0765	-0.029	0.00287055	0.0171118	0.0142413	7.646	6.937	-0.709	-479400	-481051	-1651.62	-479423	-481076	-1652.53	-0.921	-0.814	0.107	127.548	160.393	161.703	1.11762	9.197	2.188	-248.592	-247.066	-1.526	-0.25	-0.375	0.125
p-(tert-Butyl)phenolate	O-Nucleophile	DMSO	19.67	0.79	-464.308	-464.359	-0.051	-0.233	-0.152	0.081	0.157	0.02	-0.137	0.038	0.066	0.028	0.39	0.172	-0.218	-0.038	-0.066	-0.028	0.00185128	0.0126628	0.0108115	14.367	13.336	-1.031	-289333	-291256	-1922.82	-289362	-291286	-1923.82	-0.946	-0.837	0.109	149.21	218.55	248.753	1.14278	10.294	2.496	-553.272	-551.617	-1.655	-0.237	-0.369	0.132
Phenolate	O-Nucleophile	DMSO	19.86	0.71	-305.139	-307.066	-1.927	-0.24	-0.157	0.083	0.16	0.02	-0.14	0.04	0.0685	0.0285	0.4	0.177	-0.223	-0.04	-0.0685	-0.0285	0.002	0.0132549	0.0112549	6.776	5.932	-0.844	-191413	-192626	-1212.74	-191435	-192648	-1213.11	-0.937	-0.83	0.107	93.103	144.496	142.928	1.0932	7.979	1.724	-553.272	-551.617	-1.655	-0.237	-0.369	0.132
p-(tert-Butyl)phenolate	O-Nucleophile	DMF	19.9	0.8	-461.307	-464.359	-3.052	-0.232	-0.151	0.081	0.158	0.021	-0.137	0.037	0.065	0.028	0.39	0.172	-0.218	-0.037	-0.065	-0.028	0.00175513	0.012282	0.0105268	14.334	13.302	-1.032	-289333	-291255	-1922.85	-289362	-291285	-1923.88	-0.945	-0.836	0.109	149.21	218.547	248.742	1.1428	10.294	2.496	-248.592	-247.066	-1.526	-0.25	-0.375	0.125
p-Methoxyphenolate	O-Nucleophile	DMF	19.9	0.82	-419.044	-421.614	-2.57	-0.234	-0.153	0.081	0.154	0.017	-0.137	0.04	0.068	0.028	0.388	0.17	-0.218	-0.04	-0.068	-0.028	0.00206186	0.0136	0.0115381	10.819	9.81	-1.009	-262867	-264484	-1617.7	-262892	-264511	-1618.47	-0.946	-0.834	0.112	123.129	178.508	183.55	1.14308	10.067	2.2085	-248.592	-247.066	-1.526	-0.25	-0.375	0.125
p-Methoxyphenolate	O-Nucleophile	DMSO	20.09	0.8	-419.045	-421.614	-2.569	-0.235	-0.154	0.081	0.153	0.016	-0.137	0.041	0.069	0.028	0.388	0.17	-0.218	-0.041	-0.069	-0.028	0.00216624	0.0140029	0.0118367	10.841	9.834	-1.007	-262867	-264485	-1617.68	-262893	-264511	-1618.49	-0.946	-0.834	0.112	123.129	178.51	183.554	1.14308	10.067	2.2085	-553.272	-551.617	-1.655	-0.237	-0.369	0.132
p-Chlorophenolate	O-Nucleophile	DMSO	20.34	0.64	-764.067	-766.693	-2.626	-0.245	-0.163	0.082	0.148	0.008	-0.14	0.0485	0.0775	0.029	0.393	0.171	-0.222	-0.0485	-0.0775	-0.029	0.00299268	0.0175621	0.0145695	7.666	6.956	-0.71	-479400	-481052	-1651.6	-479424	-481076	-1652.1	-0.922	-0.815	0.107	127.548	160.393	161.715	1.11757	9.197	2.188	-553.272	-551.617	-1.655	-0.237	-0.369	0.132
o-(Trifluoromethyl)phenolate	O-Nucleophile	DMF	20.37	0.58	-640.862	-644.217	-3.355	-0.253	-0.171	0.082	0.143	0	-0.143	0.055	0.0855	0.0305	0.396	0.171	-0.225	-0.055	-0.0855	-0.0305	0.00381944	0.021375	0.0175556	6.263	5.541	-0.722	-402077	-404186	-2109.45	-402104	-404214	-2110.2	-0.903	-0.795	0.108	161.101	173.557	178.5	1.13224	8.722	2.1716	-248.592	-247.066	-1.526	-0.25	-0.375	0.125
p-Methoxyphenolate	O-Nucleophile	MeCN	20.62	0.69	-419.044	-421.614	-2.57	-0.234	-0.152	0.082	0.154	0.017	-0.137	0.04	0.0675	0.0275	0.388	0.169	-0.219	-0.04	-0.0675	-0.0275	0.00206186	0.01348	0.0114182	10.81	9.804	-1.006	-262867	-264484	-1617.71	-262892	-264511	-1618.53	-0.946	-0.834	0.112	123.129	178.508	183.549	1.14308	10.067	2.2085	-132.801	-131.97	-0.831	-0.341	-0.475	0.134
o,o'-di-tert-Butylphenolate	O-Nucleophile	DMSO	21.02	0.59	-617.47	-621.652	-4.182	-0.227	-0.152	0.075	0.166	0.027	-0.139	0.0305	0.0625	0.032	0.393	0.179	-0.214	-0.0305	-0.0625	-0.032	0.00118352	0.0109113	0.00972779	2.708	2.367	-0.341	-387249	-389885	-2636.71	-387284	-389922	-2638.06	-0.944	-0.847	0.097	205.316	286.567	351.264	1.19049	11.856	2.792	-553.272	-551.617	-1.655	-0.237	-0.369	0.132
m-Nitrophenolate	O-Nucleophile	DMSO	21.29	0.54	-508.675	-511.637	-2.962	-0.255	-0.175	0.08	0.075	-0.081	-0.156	0.09	0.128	0.038	0.33	0.094	-0.236	-0.09	-0.128	-0.038	0.0122727	0.0871489	0.0748762	6.564	5.752	-0.812	-319130	-320993	-1862.89	-319156	-321020	-1863.35	-0.867	-0.801	0.066	138.101	165.056	167.935	1.12148	8.654	2.21	-553.272	-551.617	-1.655	-0.237	-0.369	0.132
p-(tert-Butyl)phenolate	O-Nucleophile	MeCN	21.7	0.58	-461.307	-464.359	-3.052	-0.231	-0.151	0.08	0.158	0.021	-0.137	0.0365	0.065	0.0285	0.389	0.172	-0.217	-0.0365	-0.065	-0.0285	0.0017124	0.012282	0.0105696	14.326	13.295	-1.031	-289333	-291255	-1922.85	-289361	-291285	-1923.9	-0.945	-0.836	0.109	149.21	218.547	248.776	1.14269	10.294	2.496	-132.801	-131.97	-0.831	-0.341	-0.475	0.134
m-Nitrophenolate	O-Nucleophile	DMF	22.41	0.54	-508.675	-511.637	-2.962	-0.254	-0.174	0.08	0.074	-0.081	-0.155	0.09	0.1275	0.0375	0.328	0.093	-0.235	-0.09	-0.1275	-0.0375	0.0123476	0.0873992	0.0750516	6.546	5.735	-0.811	-319130	-320993	-1862.93	-319157	-321019	-1862.86	-0.912	-0.8	0.112	138.101	166.597	169.574	1.12465	8.72	2.236	-248.592	-247.066	-1.526	-0.25	-0.375	0.125
m-(Trifluoromethyl)phenolate	O-Nucleophile	DMSO	22.62	0.51	-640.857	-644.213	-3.356	-0.25	-0.168	0.082	0.138	-0.004	-0.142	0.056	0.086	0.03	0.388	0.164	-0.224	-0.056	-0.086	-0.03	0.00404124	0.0225488	0.0185075	8.952	8.14	-0.812	-402073	-404184	-2110.75	-402101	-404212	-2111.32	-0.921	-0.811	0.11	161.101	174.158	178.582	1.13581	8.713	2.324	-553.272	-551.617	-1.655	-0.237	-0.369	0.132
m-(Trifluoromethyl)phenolate	O-Nucleophile	MeCN	23.2	0.51	-640.856	-644.213	-3.357	-0.248	-0.167	0.081	0.14	-0.003	-0.143	0.054	0.085	0.031	0.388	0.164	-0.224	-0.054	-0.085	-0.031	0.00375773	0.0220274	0.0182697	8.926	8.117	-0.809	-402073	-404184	-2110.77	-402101	-404212	-2111.39	-0.92	-0.81	0.11	161.101	174.158	178.589	1.13579	8.713	2.324	-132.801	-131.97	-0.831	-0.341	-0.475	0.134
m-(Trifluoromethyl)phenolate	O-Nucleophile	DMF	23.4	0.51	-640.856	-644.213	-3.357	-0.249	-0.167	0.082	0.139	-0.003	-0.142	0.055	0.085	0.03	0.388	0.164	-0.224	-0.055	-0.085	-0.03	0.0038982	0.0220274	0.0181292	8.931	8.121	-0.81	-402073	-404184	-2110.77	-402101	-404212	-2111.38	-0.928	-0.81	0.118	161.101	174.158	178.586	1.1358	8.713	2.324	-248.592	-247.066	-1.526	-0.25	-0.375	0.125
m-Nitrophenolate	O-Nucleophile	MeCN	25.51	0.43	-508.675	-511.637	-2.962	-0.254	-0.174	0.08	0.074	-0.08	-0.154	0.09	0.127	0.037	0.328	0.094	-0.234	-0.09	-0.127	-0.037	0.0123476	0.0857926	0.073445	6.542	5.728	-0.814	-319130	-320993	-1862.93	-319157	-321019	-1862.57	-0.912	-0.8	0.112	138.101	166.596	169.575	1.12464	8.72	2.236	-132.801	-131.97	-0.831	-0.341	-0.475	0.134
Sulphite ion	S-Nucleophile	Water	16.83	0.56	-622.13	-624.017	-1.887	-0.209	-0.087	0.122	0.152	0.002	-0.15	0.0285	0.0425	0.014	0.361	0.089	-0.272	-0.0285	-0.0425	-0.014	0.001125	0.0101475	0.00902247	0.756	0.405	-0.351	-390384	-391569	-1185.04	-390403	-391589	-1185.49	1.578	1.229	-0.349	80.063	90.222	74.3366	1.05544	6.351	1.2397	-76.455	-76.055	-0.4	-0.304	-0.505	0.201
Thiocyanate ion	S-Nucleophile	MeCN	17.94	0.6	-490.012	-491.249	-1.237	-0.318	-0.212	0.106	0.194	0.073	-0.121	0.062	0.0695	0.0075	0.512	0.285	-0.227	-0.062	-0.0695	-0.0075	0.00375391	0.00847412	0.00472022	0.997	1.414	0.417	-307479	-308256	-776.82	-307495	-308272	-776.879	-0.563	-0.488	0.075	58.082	86.948	70.967	1.04909	6.194	1.21	-132.801	-131.97	-0.831	-0.341	-0.475	0.134
O-isopropyl dithiocarbonate	S-Nucleophile	MeCN	18.27	0.78	-1025.67	-1028.52	-2.852	-0.296	-0.191	0.105	0.114	-0.029	-0.143	0.091	0.11	0.019	0.41	0.162	-0.248	-0.091	-0.11	-0.019	0.0100988	0.0373457	0.0272469	11.641	10.821	-0.82	-643540	-645334	-1793.65	-643567	-645361	-1794.23	-0.514	-0.435	0.079	135.228	183.202	189.154	1.14985	8.856	2.1016	-132.801	-131.97	-0.831	-0.341	-0.475	0.134
O-ethyl dithiocarbonate	S-Nucleophile	MeCN	19.3	0.69	-986.621	-989.191	-2.57	-0.298	-0.192	0.106	0.113	-0.029	-0.142	0.0925	0.1105	0.018	0.411	0.163	-0.248	-0.0925	-0.1105	-0.018	0.0104091	0.0374548	0.0270457	10.2	9.477	-0.723	-619057	-620673	-1616.09	-619082	-620699	-1616.53	-0.512	-0.434	0.078	121.201	164.155	162.031	1.14229	8.895	2.0026	-132.801	-131.97	-0.831	-0.341	-0.475	0.134
Phenylsulfinate	S-Nucleophile	DMSO	19.6	0.6	-777.519	-780.499	-2.98	-0.304	-0.179	0.125	0.124	-0.014	-0.138	0.09	0.0965	0.0065	0.428	0.165	-0.263	-0.09	-0.0965	-0.0065	0.00946262	0.0282189	0.0187563	12.074	11.272	-0.802	-487830	-489704	-1874.2	-487856	-489731	-1875.09	1.561	1.38	-0.181	141.168	173.512	179.862	1.12623	8.971	2.1567	-553.272	-551.617	-1.655	-0.237	-0.369	0.132
Phenylsulfinate	S-Nucleophile	MeCN	20.11	0.59	-777.518	-780.498	-2.98	-0.304	-0.18	0.124	0.125	-0.013	-0.138	0.0895	0.0965	0.007	0.429	0.167	-0.262	-0.0895	-0.0965	-0.007	0.00933596	0.027881	0.018545	12.048	11.217	-0.831	-487830	-489704	-1873.7	-487854	-489730	-1876.13	1.56	1.376	-0.184	141.168	173.9	179.942	1.12841	8.953	2.1527	-132.801	-131.97	-0.831	-0.341	-0.475	0.134
N,N-dimethyl dithiocarbamate	S-Nucleophile	MeCN	20.93	0.63	-966.781	-969.315	-2.534	-0.284	-0.18	0.104	0.132	-0.01	-0.142	0.076	0.095	0.019	0.416	0.17	-0.246	-0.076	-0.095	-0.019	0.00694231	0.0265441	0.0196018	11.542	10.84	-0.702	-606599	-608192	-1593.58	-606625	-608219	-1594.1	-0.558	-0.493	0.065	120.216	162.167	166.94	1.10623	7.758	1.85	-132.801	-131.97	-0.831	-0.341	-0.475	0.134
Thioacetate	S-Nucleophile	MeCN	21.2	0.63	-550.051	-551.656	-1.605	-0.303	-0.193	0.11	0.177	0.011	-0.166	0.063	0.091	0.028	0.48	0.204	-0.276	-0.063	-0.091	-0.028	0.00413438	0.0202966	0.0161622	6.023	5.515	-0.508	-345128	-346137	-1009.38	-345149	-346157	-1008.48	-0.751	-0.684	0.067	75.1096	115.386	104.508	1.07558	6.748	1.4146	-132.801	-131.97	-0.831	-0.341	-0.475	0.134
Morpholin-1-yl dithiocarbamate	S-Nucleophile	MeCN	21.72	0.64	-1118.58	-1121.98	-3.409	-0.284	-0.181	0.103	0.126	-0.016	-0.142	0.079	0.0985	0.0195	0.41	0.165	-0.245	-0.079	-0.0985	-0.0195	0.00761098	0.0294008	0.0217898	13.667	12.915	-0.752	-701822	-703967	-2145.49	-701850	-703996	-2146.16	-0.556	-0.482	0.074	162.253	194.411	212.76	1.12819	9.029	2.286	-132.801	-131.97	-0.831	-0.341	-0.475	0.134
Pyrrolidin-1-yl dithiocarbamate	S-Nucleophile	MeCN	22.4	0.63	-1043.71	-1046.76	-3.047	-0.285	-0.193	0.092	0.132	-0.038	-0.17	0.0765	0.1155	0.039	0.417	0.155	-0.262	-0.0765	-0.1155	-0.039	0.00701709	0.0430331	0.036016	14.991	14.33	-0.661	-654849	-656767	-1917.58	-654875	-656793	-1918.07	-0.564	-0.501	0.063	162.253	194.411	212.76	1.12819	9.029	2.286	-132.801	-131.97	-0.831	-0.341	-0.475	0.134
2-Sulfidoacetate	S-Nucleophile	Water	22.62	0.43	-624.453	-626.416	-1.963	-0.277	-0.167	0.11	0.184	0.053	-0.131	0.0465	0.057	0.0105	0.461	0.22	-0.241	-0.0465	-0.057	-0.0105	0.00234517	0.00738409	0.00503892	4.161	3.97	-0.191	-391819	-393054	-1234.08	-391841	-393075	-1234.28	-0.858	-0.856	0.002	90.101	120.511	109.761	1.08722	6.856	1.68	-76.455	-76.055	-0.4	-0.304	-0.505	0.201
Cysteine (dianionic)	S-Nucleophile	Water	23.43	0.42	-718.543	-721.112	-2.569	-0.279	-0.173	0.106	0.184	0.057	-0.127	0.0475	0.058	0.0105	0.463	0.23	-0.233	-0.0475	-0.058	-0.0105	0.00243656	0.00731304	0.00487649	4.272	4.763	0.491	-450829	-452446	-1616.75	-450855	-452472	-1617.36	-0.875	-0.868	0.007	119.142	153.535	154.319	1.1037	8.578	2.1136	-76.455	-76.055	-0.4	-0.304	-0.505	0.201
4-Methylpiperazin-1-yl dithiocarbamate	S-Nucleophile	MeCN	23.61	0.57	-1137.78	-1141.43	-3.654	-0.282	-0.18	0.102	0.128	-0.015	-0.143	0.077	0.0975	0.0205	0.41	0.165	-0.245	-0.077	-0.0975	-0.0205	0.00723049	0.0288068	0.0215763	17.138	16.408	-0.73	-713845	-716146	-2300.54	-713875	-716177	-2301.6	-0.562	-0.489	0.073	175.295	219.116	247.085	1.15089	10.257	2.511	-132.801	-131.97	-0.831	-0.341	-0.475	0.134
Piperidin-1-yl dithiocarbamate (in MeCN)	S-Nucleophile	MeCN	23.84	0.57	-1082.75	-1086.08	-3.33	-0.281	-0.178	0.103	0.13	-0.013	-0.143	0.0755	0.0955	0.02	0.411	0.165	-0.246	-0.0755	-0.0955	-0.02	0.00693461	0.0276371	0.0207025	15.834	15.028	-0.806	-679327	-681424	-2096.26	-679355	-681452	-2096.81	-0.568	-0.497	0.071	160.28	203.223	228.046	1.12602	9.006	2.2788	-132.801	-131.97	-0.831	-0.341	-0.475	0.134
Toluene	C-Nucleophile	Dichloromethane	-4.36	1.77	-269.803	-271.638	-1.835	-0.328	-0.248	0.08	0.131	-0.012	-0.143	0.0985	0.13	0.0315	0.459	0.236	-0.223	-0.0985	-0.13	-0.0315	0.0105689	0.0358051	0.0252362	0.444	0.473	0.029	-169215	-170371	-1156.66	-169238	-170395	-1156.82	-0.51	-0.587	-0.077	92.1384	162.224	165.999	1.1108	8.305	1.7765	-959.769	-958.05	-1.719	-0.317	-0.45	0.133
2-Chloroprop-1-ene	C-Nucleophile	Dichloromethane	-3.65	1.97	-576.032	-577.572	-1.54	-0.369	-0.265	0.104	0.154	-0.006	-0.16	0.1075	0.1355	0.028	0.523	0.259	-0.264	-0.1075	-0.1355	-0.028	0.011048	0.0354445	0.0243965	2.518	2.362	-0.156	-361415	-362384	-969.104	-361436	-362405	-969.354	-0.539	-0.615	-0.076	76.5248	126.396	118.083	1.08609	6.542	1.43569	-959.769	-958.05	-1.719	-0.317	-0.45	0.133
m-Xylene	C-Nucleophile	Dichloromethane	-3.57	2.08	-308.849	-310.966	-2.117	-0.322	-0.242	0.08	0.132	-0.01	-0.142	0.095	0.126	0.031	0.454	0.232	-0.222	-0.095	-0.126	-0.031	0.00993943	0.0342155	0.0242761	0.441	0.448	0.007	-193698	-195032	-1333.76	-193723	-195058	-1335.65	-0.51	-0.586	-0.076	106.165	184.451	193.954	1.13851	9.118	2.00323	-959.769	-958.05	-1.719	-0.317	-0.45	0.133
(3,3,4,4,5,5,6,6,7,7,7-undecafluoro)-2-(trimethylsiloxy)hept-1-ene	C-Nucleophile	Dichloromethane	-3.52	1.17	-1843.18	-1851.18	-7.999	-0.371	-0.259	0.112	0.14	-0.022	-0.162	0.1155	0.1405	0.025	0.511	0.237	-0.274	-0.1155	-0.1405	-0.025	0.0130531	0.0416461	0.028593	4.62	4.714	0.094	-1.15645e+06	-1.16148e+06	-5028.85	-1.1565e+06	-1.16153e+06	-5030.26	-0.417	-0.442	-0.025	384.262	331.605	383.457	1.29937	14.18	3.47662	-959.769	-958.05	-1.719	-0.317	-0.45	0.133
3,3,3-Trifluoro-2-(trimethylsiloxy)propene	C-Nucleophile	Dichloromethane	-2.94	1.11	-895.957	-899.778	-3.821	-0.371	-0.258	0.113	0.139	-0.012	-0.151	0.116	0.135	0.019	0.51	0.246	-0.264	-0.116	-0.135	-0.019	0.0131922	0.0370427	0.0238505	4.421	4.406	-0.015	-562105	-564508	-2403.16	-562137	-564543	-2406.25	-0.423	-0.451	-0.028	384.262	331.605	383.455	1.29937	14.18	3.4766	-959.769	-958.05	-1.719	-0.317	-0.45	0.133
Hex-1-ene	C-Nucleophile	Dichloromethane	-2.77	1.41	-234.237	-235.918	-1.681	-0.362	-0.261	0.101	0.16	0.01	-0.15	0.101	0.1255	0.0245	0.522	0.271	-0.251	-0.101	-0.1255	-0.0245	0.00977107	0.0290595	0.0192884	0.508	0.525	0.017	-146871	-147932	-1061.21	-146896	-147958	-1061.72	-0.353	-0.408	-0.055	84.1595	179.017	183.874	1.14499	10.36	2.26305	-959.769	-958.05	-1.719	-0.317	-0.45	0.133
(E)-but-2-ene	C-Nucleophile	Dichloromethane	-2.45	1.1	-156.149	-157.269	-1.12	-0.363	-0.263	0.1	0.157	0.009	-0.148	0.103	0.127	0.024	0.52	0.272	-0.248	-0.103	-0.127	-0.024	0.010201	0.0296489	0.0194479	0.466	0.471	0.005	-97909.1	-98616.4	-707.307	-97930	-98637.5	-707.564	-0.349	-0.405	-0.056	56.1063	134.357	127.966	1.09426	7.861	1.55192	-959.769	-958.05	-1.719	-0.317	-0.45	0.133
(Z)-but-2-ene	C-Nucleophile	Dichloromethane	-2.44	1.09	-156.15	-157.272	-1.122	-0.347	-0.246	0.101	0.157	0.023	-0.134	0.095	0.1115	0.0165	0.504	0.269	-0.235	-0.095	-0.1115	-0.0165	0.00895337	0.0231083	0.0141549	0.256	0.272	0.016	-97909.9	-98618.4	-708.504	-97931.3	-98639.9	-708.692	-0.529	-0.605	-0.076	56.1063	133.439	127.248	1.09086	7.225	1.50931	-959.769	-958.05	-1.719	-0.317	-0.45	0.133
Propene	C-Nucleophile	Dichloromethane	-2.41	1	-117.105	-117.945	-0.84	-0.364	-0.262	0.102	0.166	0.012	-0.154	0.099	0.125	0.026	0.53	0.274	-0.256	-0.099	-0.125	-0.026	0.00924623	0.0285128	0.0192665	0.471	0.491	0.02	-73428.4	-73958.9	-530.463	-73447.1	-73977.7	-530.594	-0.527	-0.603	-0.076	42.0797	111.18	99.576	1.07032	6.543	1.23081	-959.769	-958.05	-1.719	-0.317	-0.45	0.133
Cyclopentene	C-Nucleophile	Dichloromethane	-1.55	1.1	-194.024	-195.381	-1.357	-0.345	-0.244	0.101	0.157	0.019	-0.138	0.094	0.1125	0.0185	0.502	0.263	-0.239	-0.094	-0.1125	-0.0185	0.0088008	0.0240613	0.0152605	0.224	0.243	0.019	-121671	-122527	-856.075	-121692	-122548	-856.363	-0.353	-0.409	-0.056	68.117	137.452	136.188	1.07394	6.714	1.40292	-959.769	-958.05	-1.719	-0.317	-0.45	0.133
2-(Trimethylsilyl)propene	C-Nucleophile	Dichloromethane	-1.46	1.05	-524.377	-526.682	-2.305	-0.357	-0.258	0.099	0.142	0	-0.142	0.1075	0.129	0.0215	0.499	0.258	-0.241	-0.1075	-0.129	-0.0215	0.0115794	0.03225	0.0206706	0.293	0.422	0.129	-328924	-330377	-1453.15	-328954	-330408	-1453.81	-0.519	-0.597	-0.078	114.261	204.919	230.008	1.12895	8.613	1.97474	-959.769	-958.05	-1.719	-0.317	-0.45	0.133
Anisole	C-Nucleophile	Dichloromethane	-1.18	1.2	-344.66	-346.861	-2.201	-0.332	-0.25	0.082	0.127	-0.016	-0.143	0.1025	0.133	0.0305	0.459	0.234	-0.225	-0.1025	-0.133	-0.0305	0.0114447	0.037797	0.0263523	1.769	1.621	-0.148	-216188	-217571	-1383.53	-216213	-217595	-1382.26	-0.251	-0.194	0.057	108.138	173.771	178.51	1.13359	9.446	1.96493	-959.769	-958.05	-1.719	-0.317	-0.45	0.133
Alpha-(trimethylsilyl)styrene	C-Nucleophile	Dichloromethane	-1.13	1.46	-714.927	-718.464	-3.537	-0.325	-0.241	0.084	0.12	-0.031	-0.151	0.1025	0.136	0.0335	0.445	0.21	-0.235	-0.1025	-0.136	-0.0335	0.0118048	0.0440381	0.0322333	0.328	0.406	0.078	-448459	-450687	-2227.98	-448494	-450722	-2228.87	-0.296	-0.336	-0.04	176.33	265.356	311.368	1.19464	11.436	2.65877	-959.769	-958.05	-1.719	-0.317	-0.45	0.133
(Z)-phenylpropene	C-Nucleophile	Dichloromethane	-1.07	1.1	-346.701	-349.056	-2.355	-0.313	-0.231	0.082	0.112	-0.035	-0.147	0.1005	0.133	0.0325	0.425	0.196	-0.229	-0.1005	-0.133	-0.0325	0.0118826	0.045125	0.0332424	0.451	0.458	0.007	-217445	-218929	-1483.65	-217471	-218955	-1484.13	-0.536	-0.615	-0.079	118.176	195.608	208.857	1.14924	9.767	2.23991	-959.769	-958.05	-1.719	-0.317	-0.45	0.133
Thiophene	C-Nucleophile	Dichloromethane	-1.01	1.1	-551.35	-553.072	-1.722	-0.335	-0.245	0.09	0.124	-0.021	-0.145	0.1055	0.133	0.0275	0.459	0.224	-0.235	-0.1055	-0.133	-0.0275	0.0121245	0.0394844	0.0273599	1.035	0.661	-0.374	-345930	-347013	-1083.37	-345950	-347034	-1083.59	-0.355	-0.384	-0.029	84.1395	128.019	123.117	1.06984	6.961	1.36916	-959.769	-958.05	-1.719	-0.317	-0.45	0.133
Tetramethylethylene	C-Nucleophile	Dichloromethane	-1	1.4	-234.236	-235.923	-1.687	-0.325	-0.227	0.098	0.153	0.025	-0.128	0.086	0.101	0.015	0.478	0.252	-0.226	-0.086	-0.101	-0.015	0.0077364	0.0202401	0.0125037	0	0	0	-146872	-147936	-1064.2	-146897	-147963	-1065.82	-0.515	-0.591	-0.076	84.1595	171.095	179.854	1.11057	7.74	1.81817	-959.769	-958.05	-1.719	-0.317	-0.45	0.133
Buta-1,3-diene	C-Nucleophile	Dichloromethane	-0.87	1	-154.962	-156.04	-1.078	-0.329	-0.242	0.087	0.119	-0.037	-0.156	0.105	0.1395	0.0345	0.448	0.205	-0.243	-0.105	-0.1395	-0.0345	0.0123047	0.047464	0.0351593	0	0	0	-97180.3	-97860.1	-679.851	-97199.8	-97880.2	-680.4	-0.329	-0.35	-0.021	54.0904	125.519	115.691	1.09337	7.946	1.52754	-959.769	-958.05	-1.719	-0.317	-0.45	0.133
2-(Trimethylsilyl)thiophene	C-Nucleophile	Dichloromethane	-0.8	1	-958.631	-961.817	-3.186	-0.329	-0.24	0.089	0.114	-0.027	-0.141	0.1075	0.1335	0.026	0.443	0.213	-0.23	-0.1075	-0.1335	-0.026	0.0130432	0.0418363	0.0287931	1.186	0.837	-0.349	-601431	-603436	-2005.51	-601462	-603469	-2006.37	-0.345	-0.378	-0.033	156.321	226.811	255.52	1.16494	9.954	2.28555	-959.769	-958.05	-1.719	-0.317	-0.45	0.133
1-(p-Tolyl)-1-(trimethylsilyl)ethene	C-Nucleophile	Dichloromethane	-0.65	1.59	-753.973	-757.791	-3.818	-0.315	-0.233	0.082	0.122	-0.029	-0.151	0.0965	0.131	0.0345	0.437	0.204	-0.233	-0.0965	-0.131	-0.0345	0.0106547	0.0420613	0.0314065	0.232	0.373	0.141	-472941	-475347	-2405.82	-472979	-475386	-2406.8	-0.509	-0.587	-0.078	190.357	287.707	339.339	1.22307	12.53	2.91192	-959.769	-958.05	-1.719	-0.317	-0.45	0.133
4,4,5,5-tetramethyl-2-prop-2-enyl-1,3,2-dioxaborolane	C-Nucleophile	Dichloromethane	-0.64	1.1	-526.515	-529.946	-3.431	-0.357	-0.254	0.103	0.148	0.003	-0.145	0.1045	0.1255	0.021	0.505	0.257	-0.248	-0.1045	-0.1255	-0.021	0.0108121	0.0306425	0.0198304	2.23	2.003	-0.227	-330202	-332365	-2163.29	-330239	-332403	-2164.63	-0.756	-0.794	-0.038	170.057	278.536	315.18	1.24384	11.186	2.77356	-959.769	-958.05	-1.719	-0.317	-0.45	0.133
(2-Methylallyl)trichlorosilane	C-Nucleophile	Dichloromethane	-0.57	0.95	-944.312	-947.03	-2.718	-0.355	-0.255	0.1	0.141	-0.005	-0.146	0.107	0.13	0.023	0.496	0.25	-0.246	-0.107	-0.13	-0.023	0.0115413	0.0338	0.0222587	3.37	3.24	-0.13	-592461	-594171	-1710.32	-592491	-594202	-1710.93	-0.858	-0.874	-0.016	134.679	203.206	222.031	1.14617	9.483	2.15716	-959.769	-958.05	-1.719	-0.317	-0.45	0.133
Allylchlorodimethylsilane	C-Nucleophile	Dichloromethane	-0.57	1.06	-1823.2	-1827.02	-3.827	-0.358	-0.26	0.098	0.131	-0.029	-0.16	0.1135	0.1445	0.031	0.489	0.231	-0.258	-0.1135	-0.1445	-0.031	0.013172	0.0451953	0.0320233	3.348	3.296	-0.052	-1.144e+06	-1.1464e+06	-2404.99	-1.14403e+06	-1.14643e+06	-2405.76	-0.891	-0.898	-0.007	189.543	207.417	228.151	1.14891	9.398	2.26896	-959.769	-958.05	-1.719	-0.317	-0.45	0.133
(1Z,3Z)-cycloocta-1,3-diene	C-Nucleophile	Dichloromethane	-0.5	1.1	-309.966	-312.123	-2.157	-0.318	-0.226	0.092	0.13	-0.023	-0.153	0.094	0.1245	0.0305	0.448	0.203	-0.245	-0.094	-0.1245	-0.0305	0.00986161	0.038178	0.0283163	0.785	0.77	-0.015	-194381	-195743	-1361.36	-194405	-195767	-1361.86	-0.367	-0.421	-0.054	108.181	181.444	201.876	1.09046	7.934	1.88344	-959.769	-958.05	-1.719	-0.317	-0.45	0.133
(E)-prop-1-en-1-ylbenzene	C-Nucleophile	Dichloromethane	-0.49	1.18	-346.705	-349.06	-2.355	-0.304	-0.226	0.078	0.104	-0.04	-0.144	0.1	0.133	0.033	0.408	0.186	-0.222	-0.1	-0.133	-0.033	0.0122549	0.0475511	0.0352962	0.59	0.637	0.047	-217448	-218932	-1483.81	-217474	-218959	-1484.5	-0.517	-0.595	-0.078	118.176	198.885	209.63	1.16561	10.723	2.4105	-959.769	-958.05	-1.719	-0.317	-0.45	0.133
Methylenecyclopropane	C-Nucleophile	Dichloromethane	-0.47	1.06	-154.927	-156.008	-1.081	-0.368	-0.265	0.103	0.151	-0.001	-0.152	0.1085	0.133	0.0245	0.519	0.264	-0.255	-0.1085	-0.133	-0.0245	0.0113413	0.0335019	0.0221606	0.565	0.561	-0.004	-97158.1	-97840	-681.98	-97177.5	-97859.7	-682.226	-0.375	-0.413	-0.038	54.0904	124.005	113.614	1.09331	6.582	1.33254	-959.769	-958.05	-1.719	-0.317	-0.45	0.133
Beta-(trimethylsilyl)styrene	C-Nucleophile	Dichloromethane	-0.43	1.06	-424.787	-427.705	-2.918	-0.308	-0.227	0.081	0.119	-0.032	-0.151	0.0945	0.1295	0.035	0.427	0.195	-0.232	-0.0945	-0.1295	-0.035	0.010457	0.0430006	0.0325437	0.13	0.257	0.127	-266407	-268246	-1839.42	-266438	-268278	-1839.61	-0.514	-0.358	0.156	146.229	232.656	261.858	1.1756	10.755	2.41378	-959.769	-958.05	-1.719	-0.317	-0.45	0.133
Diethyl diazomalonate	C-Nucleophile	Dichloromethane	-0.35	0.93	-680.601	-683.319	-2.718	-0.403	-0.268	0.135	0.07	-0.091	-0.161	0.1665	0.1795	0.013	0.473	0.177	-0.296	-0.1665	-0.1795	-0.013	0.0293047	0.0910177	0.061713	7.229	6.821	-0.408	-426942	-428670	-1728.24	-426987	-428707	-1719.76	-0.508	-0.226	0.282	186.165	246.352	257.143	1.25998	12.767	2.8034	-959.769	-958.05	-1.719	-0.317	-0.45	0.133
2-(Pentamethyldisilyl)propene	C-Nucleophile	Dichloromethane	-0.26	0.95	-892.584	-896.077	-3.493	-0.333	-0.238	0.095	0.131	-0.004	-0.135	0.101	0.121	0.02	0.464	0.234	-0.23	-0.101	-0.121	-0.02	0.0109925	0.0312842	0.0202917	0.37	0.51	0.14	-559925	-562125	-2200.14	-559961	-562165	-2204.37	-0.522	-0.596	-0.074	172.415	270.842	334.592	1.16224	10.13	2.4328	-959.769	-958.05	-1.719	-0.317	-0.45	0.133
Norbornene	C-Nucleophile	Dichloromethane	-0.25	1.09	-270.924	-272.799	-1.875	-0.341	-0.242	0.099	0.156	0.01	-0.146	0.0925	0.116	0.0235	0.497	0.252	-0.245	-0.0925	-0.116	-0.0235	0.0086079	0.0266984	0.0180905	0.343	0.409	0.066	-169902	-171084	-1182.63	-169923	-171106	-1182.98	-0.206	-0.236	-0.03	94.1543	159.936	171.004	1.07365	7.236	1.53736	-959.769	-958.05	-1.719	-0.317	-0.45	0.133
Allyltriphenylsilane	C-Nucleophile	Dichloromethane	-0.13	1.21	-1096.01	-1102.01	-5.999	-0.33	-0.245	0.085	0.103	-0.031	-0.134	0.1135	0.138	0.0245	0.433	0.214	-0.219	-0.1135	-0.138	-0.0245	0.0148756	0.0444953	0.0296197	0.813	0.781	-0.032	-687517	-691294	-3776.25	-687558	-691340	-3782.31	-0.851	-0.862	-0.011	300.469	383.212	474.921	1.30201	12.508	3.375	-959.769	-958.05	-1.719	-0.317	-0.45	0.133
1H-Inden-1-yl)trimethylsilane	C-Nucleophile	Dichloromethane	-0.1	1.05	-752.814	-756.591	-3.777	-0.297	-0.221	0.076	0.113	-0.028	-0.141	0.092	0.1245	0.0325	0.41	0.193	-0.217	-0.092	-0.1245	-0.0325	0.010322	0.0401561	0.0298341	1.353	1.683	0.33	-472228	-474607	-2379.06	-472262	-474643	-2380.25	-0.673	-0.662	0.011	188.341	266.382	319.719	1.17828	11.322	2.60017	-959.769	-958.05	-1.719	-0.317	-0.45	0.133
Phenylacetylene	C-Nucleophile	Dichloromethane	-0.04	0.77	-306.45	-308.477	-2.027	-0.328	-0.247	0.081	0.097	-0.045	-0.142	0.1155	0.146	0.0305	0.425	0.202	-0.223	-0.1155	-0.146	-0.0305	0.0156944	0.0527624	0.037068	1.018	0.995	-0.023	-192223	-193499	-1276.68	-192246	-193523	-1277.2	-0.219	-0.213	0.006	102.133	170.289	171.013	1.14312	9.985	2.02636	-959.769	-958.05	-1.719	-0.317	-0.45	0.133
2,3,3-Trimethyl-but-1-ene	C-Nucleophile	Dichloromethane	0.06	1.07	-273.277	-275.242	-1.965	-0.35	-0.251	0.099	0.154	0.015	-0.139	0.098	0.118	0.02	0.504	0.266	-0.238	-0.098	-0.118	-0.02	0.00952778	0.0261729	0.0166452	0.683	0.673	-0.01	-171350	-172590	-1239.98	-171377	-172617	-1240.68	-0.522	-0.598	-0.076	98.1861	182.294	203.979	1.08802	8.026	1.83365	-959.769	-958.05	-1.719	-0.317	-0.45	0.133
Cyclohepta-1,3-diene	C-Nucleophile	Dichloromethane	0.06	1.1	-270.928	-272.805	-1.877	-0.31	-0.221	0.089	0.116	-0.033	-0.149	0.097	0.127	0.03	0.426	0.188	-0.238	-0.097	-0.127	-0.03	0.0110434	0.0428963	0.0318528	0.918	0.963	0.045	-169905	-171089	-1184.21	-169928	-171113	-1184.48	-0.363	-0.419	-0.056	94.1543	166.114	176.847	1.09043	7.715	1.76381	-959.769	-958.05	-1.719	-0.317	-0.45	0.133
1-Methylcyclohex-1-ene	C-Nucleophile	Dichloromethane	0.08	1.15	-272.123	-274.042	-1.919	-0.334	-0.235	0.099	0.152	0.022	-0.13	0.091	0.1065	0.0155	0.486	0.257	-0.229	-0.091	-0.1065	-0.0155	0.00851955	0.0220666	0.0135471	0.335	0.333	-0.002	-170640	-171850	-1210.51	-170663	-171874	-1210.96	-0.512	-0.588	-0.076	96.1702	175.721	189.166	1.10285	8.352	1.84141	-959.769	-958.05	-1.719	-0.317	-0.45	0.133
3-Methylanisole	C-Nucleophile	Dichloromethane	0.13	1.27	-383.715	-386.194	-2.479	-0.312	-0.226	0.086	0.134	-0.009	-0.143	0.089	0.1175	0.0285	0.446	0.217	-0.229	-0.089	-0.1175	-0.0285	0.00888004	0.0318116	0.0229316	1.296	1.264	-0.032	-240672	-242234	-1561.99	-240699	-242262	-1562.64	-0.511	-0.585	-0.074	122.164	194.247	204.824	1.15618	9.934	2.20395	-959.769	-958.05	-1.719	-0.317	-0.45	0.133
(2-Methylallyl)benzene	C-Nucleophile	Dichloromethane	0.25	1	-385.746	-388.379	-2.633	-0.33	-0.249	0.081	0.128	-0.015	-0.143	0.101	0.132	0.031	0.458	0.234	-0.224	-0.101	-0.132	-0.031	0.0111365	0.0372308	0.0260943	0.457	0.454	-0.003	-241927	-243587	-1659.72	-241955	-243616	-1660.52	-0.527	-0.602	-0.075	132.202	215.951	237.385	1.16495	10.218	2.37958	-959.769	-958.05	-1.719	-0.317	-0.45	0.133
2,4-Dimethyl-penta-1,4-diene	C-Nucleophile	Dichloromethane	0.54	1	-194	-195.356	-1.356	-0.364	-0.264	0.1	0.153	-0.004	-0.157	0.1055	0.134	0.0285	0.517	0.26	-0.257	-0.1055	-0.134	-0.0285	0.0107643	0.0345308	0.0237665	0.381	0.396	0.015	-121657	-122513	-855.744	-121680	-122536	-856.047	-0.389	-0.445	-0.056	68.117	149.36	144.332	1.12266	8.582	1.80463	-959.769	-958.05	-1.719	-0.317	-0.45	0.133
2-(Tris(pentafluorophenyl)siloxy)-propene	C-Nucleophile	Dichloromethane	0.58	0.91	-2653.99	-2666.16	-12.168	-0.359	-0.254	0.105	0.059	-0.068	-0.127	0.15	0.161	0.011	0.418	0.186	-0.232	-0.15	-0.161	-0.011	0.0269139	0.0696801	0.0427662	2.51	2.05	-0.46	-1.66523e+06	-1.67288e+06	-7642.79	-1.66529e+06	-1.67294e+06	-7651.6	-0.553	-0.622	-0.069	586.325	426.961	524.554	1.35764	13.539	3.988	-959.769	-958.05	-1.719	-0.317	-0.45	0.133
2,3-dimethyl-but-1-ene	C-Nucleophile	Dichloromethane	0.65	1	-234.237	-235.92	-1.683	-0.35	-0.251	0.099	0.153	0.014	-0.139	0.0985	0.1185	0.02	0.503	0.265	-0.238	-0.0985	-0.1185	-0.02	0.00964438	0.0264948	0.0168504	0.742	0.736	-0.006	-146871	-147934	-1062.49	-146896	-147959	-1062.92	-0.521	-0.597	-0.076	84.1595	169.193	180.019	1.09756	8.002	1.77875	-959.769	-958.05	-1.719	-0.317	-0.45	0.133
2-Methylbut-2-ene	C-Nucleophile	Dichloromethane	0.65	1.17	-195.196	-196.6	-1.404	-0.336	-0.236	0.1	0.155	0.024	-0.131	0.0905	0.106	0.0155	0.491	0.26	-0.231	-0.0905	-0.106	-0.0155	0.00834038	0.0216077	0.0132673	0.279	0.267	-0.012	-122393	-123279	-886.234	-122416	-123303	-886.452	-0.527	-0.602	-0.075	70.1329	154.043	154.465	1.10665	7.729	1.69969	-959.769	-958.05	-1.719	-0.317	-0.45	0.133
(Z)-Penta-1,3-diene	C-Nucleophile	Dichloromethane	0.66	1	-194.008	-195.368	-1.36	-0.318	-0.231	0.087	0.124	-0.031	-0.155	0.097	0.131	0.034	0.442	0.2	-0.242	-0.097	-0.131	-0.034	0.0106437	0.0429025	0.0322588	0.658	0.734	0.076	-121662	-122520	-857.96	-121685	-122543	-858.192	-0.532	-0.609	-0.077	68.117	147.752	143.346	1.11566	8.277	1.80712	-959.769	-958.05	-1.719	-0.317	-0.45	0.133
Cyclohexa-1,3-diene	C-Nucleophile	Dichloromethane	0.67	1.1	-230.757	-232.311	-1.554	-0.34	-0.26	0.08	0.132	-0.013	-0.145	0.104	0.1365	0.0325	0.472	0.247	-0.225	-0.104	-0.1365	-0.0325	0.0114576	0.0377171	0.0262595	0	0	0	-144732	-145711	-978.89	-144752	-145731	-979.145	-0.192	-0.206	-0.014	78.1118	139.96	138.025	1.08381	7.359	1.50704	-959.769	-958.05	-1.719	-0.317	-0.45	0.133
2,4,6-Trimethylstyrene	C-Nucleophile	Dichloromethane	0.68	1.09	-424.785	-427.705	-2.92	-0.301	-0.227	0.074	0.107	-0.032	-0.139	0.097	0.1295	0.0325	0.408	0.195	-0.213	-0.097	-0.1295	-0.0325	0.0115306	0.0430006	0.03147	0.223	0.257	0.034	-266406	-268246	-1839.94	-266435	-268278	-1843.19	-0.333	-0.358	-0.025	146.229	232.656	261.858	1.1756	10.755	2.4137	-959.769	-958.05	-1.719	-0.317	-0.45	0.133
Styrene	C-Nucleophile	Dichloromethane	0.78	0.95	-307.657	-309.73	-2.073	-0.311	-0.235	0.076	0.096	-0.046	-0.142	0.1075	0.1405	0.033	0.407	0.189	-0.218	-0.1075	-0.1405	-0.033	0.0141969	0.0522229	0.038026	0.181	0.226	0.045	-192964	-194271	-1306.03	-192989	-194295	-1306.12	-0.327	-0.351	-0.024	104.149	174.486	181.153	1.12716	9.742	2.02269	-959.769	-958.05	-1.719	-0.317	-0.45	0.133
2,4,4-Trimethyl-pent-1-ene	C-Nucleophile	Dichloromethane	0.79	1.07	-312.322	-314.567	-2.245	-0.347	-0.248	0.099	0.149	0.009	-0.14	0.099	0.1195	0.0205	0.496	0.257	-0.239	-0.099	-0.1195	-0.0205	0.00988004	0.0277826	0.0179025	0.624	0.619	-0.005	-195832	-197249	-1417.1	-195860	-197278	-1417.88	-0.52	-0.596	-0.076	112.213	201.509	232.056	1.10362	8.969	2.08373	-959.769	-958.05	-1.719	-0.317	-0.45	0.133
2-Methylpent-1-ene	C-Nucleophile	Dichloromethane	0.84	1.06	-234.239	-235.922	-1.683	-0.35	-0.25	0.1	0.155	0.014	-0.141	0.0975	0.118	0.0205	0.505	0.264	-0.241	-0.0975	-0.118	-0.0205	0.00941213	0.0263712	0.0169591	0.736	0.73	-0.006	-146873	-147935	-1061.98	-146898	-147960	-1062.37	-0.526	-0.601	-0.075	84.1595	175.049	182.477	1.12532	9.002	2.00068	-959.769	-958.05	-1.719	-0.317	-0.45	0.133
Trimethyl(prenyl)silane	C-Nucleophile	Dichloromethane	0.9	1.17	-602.469	-605.338	-2.869	-0.32	-0.223	0.097	0.137	0.02	-0.117	0.0915	0.1015	0.01	0.457	0.243	-0.214	-0.0915	-0.1015	-0.01	0.00916001	0.021198	0.012038	0.233	0.298	0.065	-377889	-379698	-1808.91	-377923	-379733	-1810.04	-0.83	-0.847	-0.017	142.314	247.704	286.565	1.17862	10.813	2.50703	-959.769	-958.05	-1.719	-0.317	-0.45	0.133
2-Methyl-but-1-ene	C-Nucleophile	Dichloromethane	1	1	-195.195	-196.597	-1.402	-0.351	-0.251	0.1	0.153	0.013	-0.14	0.099	0.119	0.02	0.504	0.264	-0.24	-0.099	-0.119	-0.02	0.00972321	0.0268201	0.0170969	0.714	0.704	-0.01	-122392	-123277	-885	-122415	-123300	-885.292	-0.527	-0.602	-0.075	70.1329	152.807	154.575	1.09725	7.823	1.65621	-959.769	-958.05	-1.719	-0.317	-0.45	0.133
Isoprene	C-Nucleophile	Dichloromethane	1.1	0.98	-194.009	-195.368	-1.359	-0.326	-0.239	0.087	0.12	-0.034	-0.154	0.103	0.1365	0.0335	0.446	0.205	-0.241	-0.103	-0.1365	-0.0335	0.0118935	0.0454445	0.033551	0.306	0.316	0.01	-121663	-122520	-857.498	-121685	-122542	-857.772	-0.524	-0.6	-0.076	68.117	144.321	142.246	1.09536	7.935	1.62178	-959.769	-958.05	-1.719	-0.317	-0.45	0.133
2-Methylprop-1-ene	C-Nucleophile	Dichloromethane	1.11	0.98	-156.153	-157.275	-1.122	-0.351	-0.251	0.1	0.156	0.015	-0.141	0.0975	0.118	0.0205	0.507	0.266	-0.241	-0.0975	-0.118	-0.0205	0.009375	0.0261729	0.0167979	0.72	0.717	-0.003	-97912.2	-98620.2	-707.993	-97933.1	-98641.3	-708.224	-0.525	-0.599	-0.074	56.1063	132.268	127.113	1.08206	6.719	1.41681	-959.769	-958.05	-1.719	-0.317	-0.45	0.133
2,5-Dimethyl-hexa-1,5-diene	C-Nucleophile	Dichloromethane	1.14	1	-311.138	-313.338	-2.2	-0.345	-0.247	0.098	0.151	0.006	-0.145	0.097	0.1205	0.0235	0.496	0.253	-0.243	-0.097	-0.1205	-0.0235	0.00948488	0.0286961	0.0192113	0	0	0	-195104	-196492	-1388.14	-195133	-196522	-1388.49	-0.525	-0.6	-0.075	110.197	208.598	225.653	1.16396	10.247	2.39493	-959.769	-958.05	-1.719	-0.317	-0.45	0.133
Methylenecyclohexane	C-Nucleophile	Dichloromethane	1.16	1.04	-272.121	-274.038	-1.917	-0.348	-0.249	0.099	0.148	0.01	-0.138	0.1	0.1195	0.0195	0.496	0.259	-0.237	-0.1	-0.1195	-0.0195	0.0100806	0.0275681	0.0174874	0.853	0.845	-0.008	-170638	-171848	-1210	-170661	-171871	-1210.44	-0.356	-0.409	-0.053	96.1702	173.393	188.31	1.09153	8.124	1.79571	-959.769	-958.05	-1.719	-0.317	-0.45	0.133
2,3-Dimethylbuta-1,3-diene	C-Nucleophile	Dichloromethane	1.17	1	-233.053	-234.694	-1.641	-0.326	-0.237	0.089	0.12	-0.032	-0.152	0.103	0.1345	0.0315	0.446	0.205	-0.241	-0.103	-0.1345	-0.0315	0.0118935	0.0441226	0.0322291	0	0	0	-146144	-147179	-1035.37	-146167	-147203	-1035.81	-0.519	-0.596	-0.077	82.1436	162.223	168.063	1.10168	8.008	1.76102	-959.769	-958.05	-1.719	-0.317	-0.45	0.133
(2E,4E)-hexa-2,4-diene	C-Nucleophile	Dichloromethane	1.17	1.1	-233.059	-234.7	-1.641	-0.307	-0.22	0.087	0.135	-0.021	-0.156	0.086	0.1205	0.0345	0.442	0.199	-0.243	-0.086	-0.1205	-0.0345	0.00836652	0.036483	0.0281165	0	0	0	-146147	-147183	-1035.47	-146172	-147208	-1035.83	-0.519	-0.598	-0.079	82.1436	174.573	172.835	1.16362	10.119	2.31088	-959.769	-958.05	-1.719	-0.317	-0.45	0.133
1-Methylcyclopent-1-ene	C-Nucleophile	Dichloromethane	1.18	1.17	-233.074	-234.712	-1.638	-0.333	-0.233	0.1	0.154	0.024	-0.13	0.0895	0.1045	0.015	0.487	0.257	-0.23	-0.0895	-0.1045	-0.015	0.00822408	0.0212456	0.0130215	0.349	0.342	-0.007	-146156	-147189	-1033.48	-146178	-147212	-1033.87	-0.521	-0.597	-0.076	82.1436	159.926	164.413	1.10209	7.866	1.68375	-959.769	-958.05	-1.719	-0.317	-0.45	0.133
Furan	C-Nucleophile	Dichloromethane	1.33	1.29	-228.684	-230.086	-1.402	-0.327	-0.238	0.089	0.162	0.003	-0.159	0.0825	0.1175	0.035	0.489	0.241	-0.248	-0.0825	-0.1175	-0.035	0.00695936	0.0286437	0.0216843	0.844	0.747	-0.097	-143452	-144335	-882.784	-143471	-144354	-882.984	-0.308	-0.312	-0.004	68.074	116.746	107.263	1.06954	6.735	1.25948	-959.769	-958.05	-1.719	-0.317	-0.45	0.133
2-Methylthiophene	C-Nucleophile	Dichloromethane	1.35	0.99	-590.398	-592.401	-2.003	-0.324	-0.234	0.09	0.125	-0.018	-0.143	0.0995	0.126	0.0265	0.449	0.216	-0.233	-0.0995	-0.126	-0.0265	0.0110248	0.03675	0.0257252	1.132	0.882	-0.25	-370413	-371674	-1260.55	-370436	-371697	-1261	-0.522	-0.601	-0.079	98.1661	151.53	151.703	1.10177	8.074	1.62352	-959.769	-958.05	-1.719	-0.317	-0.45	0.133
1-(perfluorophenyl)-1-(trimethylsiloxy)ethene	C-Nucleophile	Dichloromethane	1.47	0.89	-1284.2	-1290.03	-5.836	-0.346	-0.244	0.102	0.086	-0.048	-0.134	0.13	0.146	0.016	0.432	0.196	-0.236	-0.13	-0.146	-0.016	0.0195602	0.0543776	0.0348174	4.054	3.595	-0.459	-805702	-809370	-3667.82	-805742	-809415	-3672.92	-0.43	-0.452	-0.022	282.282	295.006	338.252	1.25678	12.775	3.256	-959.769	-958.05	-1.719	-0.317	-0.45	0.133
(E)-penta-1,3-diene	C-Nucleophile	Dichloromethane	1.49	1	-194.011	-195.37	-1.359	-0.318	-0.23	0.088	0.127	-0.029	-0.156	0.0955	0.1295	0.034	0.445	0.201	-0.244	-0.0955	-0.1295	-0.034	0.0102475	0.041717	0.0314696	0.764	0.838	0.074	-121664	-122522	-857.676	-121686	-122544	-857.917	-0.521	-0.6	-0.079	68.117	150.045	144.27	1.12813	8.983	1.91944	-959.769	-958.05	-1.719	-0.317	-0.45	0.133
Methylenecyclododecane	C-Nucleophile	Dichloromethane	1.52	0.9	-506.349	-509.955	-3.606	-0.344	-0.247	0.097	0.153	0.01	-0.143	0.0955	0.1185	0.023	0.497	0.257	-0.24	-0.0955	-0.1185	-0.023	0.0091753	0.0273196	0.0181443	0.797	0.771	-0.026	-317501	-319776	-2275.02	-317533	-319810	-2277.82	-0.363	-0.415	-0.052	180.33	269.941	342.868	1.13966	10.984	2.767	-959.769	-958.05	-1.719	-0.317	-0.45	0.133
2,7-Dimethylocta-1,7-diene	C-Nucleophile	Dichloromethane	1.58	1	-389.227	-391.987	-2.76	-0.347	-0.248	0.099	0.154	0.011	-0.143	0.0965	0.1185	0.022	0.501	0.259	-0.242	-0.0965	-0.1185	-0.022	0.00929366	0.0271086	0.0178149	0	0	0	-244066	-245808	-1742.02	-244099	-245842	-1742.73	-0.525	-0.6	-0.075	138.25	253.317	281.551	1.21959	12.679	3.15351	-959.769	-958.05	-1.719	-0.317	-0.45	0.133
Methylenecyclobutane	C-Nucleophile	Dichloromethane	1.65	0.9	-193.99	-195.349	-1.359	-0.352	-0.251	0.101	0.151	0.005	-0.146	0.1005	0.123	0.0225	0.503	0.256	-0.247	-0.1005	-0.123	-0.0225	0.01004	0.0295488	0.0195088	0.759	0.717	-0.042	-121651	-122508	-857.481	-121672	-122530	-857.814	-0.362	-0.411	-0.049	68.117	142.267	139.329	1.09479	7.421	1.49709	-959.769	-958.05	-1.719	-0.317	-0.45	0.133
Allyltrimethylsilane	C-Nucleophile	Dichloromethane	1.68	1	-524.377	-526.683	-2.306	-0.344	-0.244	0.1	0.14	0.01	-0.13	0.102	0.117	0.015	0.484	0.254	-0.23	-0.102	-0.117	-0.015	0.0107479	0.0269469	0.0161989	0.738	0.853	0.115	-328924	-330378	-1453.15	-328954	-330408	-1453.77	-0.834	-0.85	-0.016	114.261	208.958	231.896	1.14495	9.585	2.09041	-959.769	-958.05	-1.719	-0.317	-0.45	0.133
Tert-butyl indole-1-carboxylate	C-Nucleophile	MeCN	1.68	1.26	-705.4	-709.841	-4.441	-0.302	-0.227	0.075	0.102	-0.036	-0.138	0.1	0.1315	0.0315	0.404	0.191	-0.213	-0.1	-0.1315	-0.0315	0.0123762	0.0452677	0.0328914	3.832	3.715	-0.117	-442467	-445262	-2795.37	-442499	-445298	-2798.59	-0.268	-0.263	0.005	217.264	285.438	327.697	1.24199	13.173	3.073	-132.801	-131.97	-0.831	-0.341	-0.475	0.134
Methylenecyclopentadecane	C-Nucleophile	Dichloromethane	1.69	0.9	-584.441	-588.606	-4.165	-0.347	-0.248	0.099	0.156	0.012	-0.144	0.0955	0.118	0.0225	0.503	0.26	-0.243	-0.0955	-0.118	-0.0225	0.00906585	0.0267769	0.0177111	0.914	0.926	0.012	-366463	-369093	-2629.55	-366500	-369131	-2630.95	-0.352	-0.408	-0.056	208.383	306.147	396.171	1.17381	12.378	3.11182	-959.769	-958.05	-1.719	-0.317	-0.45	0.133
2,6-Dimethyl-hepta-1,6-diene	C-Nucleophile	Dichloromethane	1.69	1	-350.182	-352.662	-2.48	-0.346	-0.247	0.099	0.15	0.006	-0.144	0.098	0.1205	0.0225	0.496	0.253	-0.243	-0.098	-0.1205	-0.0225	0.00968145	0.0286961	0.0190147	1.08	1.077	-0.003	-219585	-221150	-1565.09	-219616	-221182	-1565.93	-0.525	-0.6	-0.075	124.223	230.957	253.576	1.19229	10.973	2.74172	-959.769	-958.05	-1.719	-0.317	-0.45	0.133
(Z)-But-2-enyltrimethylsilane	C-Nucleophile	Dichloromethane	1.69	1.1	-563.422	-566.01	-2.588	-0.33	-0.232	0.098	0.138	0.019	-0.119	0.096	0.1065	0.0105	0.468	0.251	-0.217	-0.096	-0.1065	-0.0105	0.00984615	0.0225941	0.012748	0.396	0.491	0.095	-353406	-355037	-1631.11	-353438	-355070	-1631.97	-0.838	-0.604	0.234	128.287	227.325	259.293	1.15623	9.928	2.30252	-959.769	-958.05	-1.719	-0.317	-0.45	0.133
1-Methyl-4-vinyl-benzene	C-Nucleophile	Dichloromethane	1.7	1.06	-346.704	-349.058	-2.354	-0.303	-0.228	0.075	0.1	-0.042	-0.142	0.1015	0.135	0.0335	0.403	0.186	-0.217	-0.1015	-0.135	-0.0335	0.0127819	0.0489919	0.03621	0.757	0.86	0.103	-217447	-218931	-1483.81	-217475	-218959	-1484.58	-0.51	-0.588	-0.078	118.176	196.837	209.18	1.15527	10.752	2.28763	-959.769	-958.05	-1.719	-0.317	-0.45	0.133
3-(Trimethylsilyl)cyclopentene	C-Nucleophile	Dichloromethane	1.77	1.1	-601.293	-604.116	-2.823	-0.325	-0.227	0.098	0.138	0.016	-0.122	0.0935	0.1055	0.012	0.463	0.243	-0.22	-0.0935	-0.1055	-0.012	0.00944087	0.0229017	0.0134609	0.268	0.36	0.092	-377165	-378944	-1779.17	-377196	-378976	-1780.26	-0.665	-0.661	0.004	140.298	225.816	265.679	1.13007	9.534	2.19639	-959.769	-958.05	-1.719	-0.317	-0.45	0.133
Allyl-tert.butyl-dimethylsilane	C-Nucleophile	Dichloromethane	1.8	0.95	-641.495	-644.645	-3.15	-0.343	-0.242	0.101	0.142	0.009	-0.133	0.1005	0.1165	0.016	0.485	0.251	-0.234	-0.1005	-0.1165	-0.016	0.0104126	0.0270364	0.0166237	0.737	0.786	0.049	-402358	-404344	-1985.77	-402394	-404380	-1986.66	-0.849	-0.868	-0.019	156.341	249.621	306.581	1.13547	10.902	2.4218	-959.769	-958.05	-1.719	-0.317	-0.45	0.133
(5-Methyl-furan-2-yl) MIDA boronate	C-Nucleophile	MeCN	1.84	1.26	-839.463	-844.371	-4.908	-0.309	-0.226	0.083	0.135	-0.014	-0.149	0.087	0.12	0.033	0.444	0.212	-0.232	-0.087	-0.12	-0.033	0.00852365	0.0339623	0.0254386	11.017	10.022	-0.995	-526613	-529701	-3088.25	-526646	-529738	-3092.17	-0.241	-0.323	-0.082	156.341	255.584	310.042	1.15392	10.88	2.4742	-132.801	-131.97	-0.831	-0.341	-0.475	0.134
Allyltriethylsilane	C-Nucleophile	Dichloromethane	1.93	0.95	-641.491	-644.639	-3.148	-0.343	-0.243	0.1	0.144	0.01	-0.134	0.0995	0.1165	0.017	0.487	0.253	-0.234	-0.0995	-0.1165	-0.017	0.0101645	0.0268226	0.0166581	0.801	0.875	0.074	-402355	-404340	-1984.95	-402391	-404377	-1986.15	-0.84	-0.856	-0.016	156.341	255.983	311.035	1.15326	10.896	2.47339	-959.769	-958.05	-1.719	-0.317	-0.45	0.133
(E)-but-2-enyltrimethylsilane	C-Nucleophile	Dichloromethane	1.94	1.1	-563.424	-566.011	-2.587	-0.331	-0.232	0.099	0.141	0.018	-0.123	0.095	0.107	0.012	0.472	0.25	-0.222	-0.095	-0.107	-0.012	0.00956038	0.022898	0.0133376	0.214	0.308	0.094	-353407	-355038	-1630.86	-353440	-355071	-1631.55	-0.825	-0.843	-0.018	128.287	233.491	260.506	1.1839	10.824	2.4251	-959.769	-958.05	-1.719	-0.317	-0.45	0.133
Allyltris(trimethylsilyl)silane	C-Nucleophile	Dichloromethane	1.95	0.98	-1629.01	-1634.88	-5.866	-0.331	-0.237	0.094	0.128	0.001	-0.127	0.1015	0.118	0.0165	0.459	0.238	-0.221	-0.1015	-0.118	-0.0165	0.0112225	0.0292521	0.0180296	0.747	0.811	0.064	-1.02193e+06	-1.02563e+06	-3693.99	-1.02198e+06	-1.02568e+06	-3701.3	-0.791	-0.812	-0.021	288.724	372.659	536.724	1.16699	11.613	3.03	-959.769	-958.05	-1.719	-0.317	-0.45	0.133
3-(Trihexylsilyl)cyclopentene	C-Nucleophile	Dichloromethane	1.98	1.1	-1186.93	-1193.96	-7.032	-0.32	-0.225	0.095	0.145	0.016	-0.129	0.0875	0.1045	0.017	0.465	0.241	-0.224	-0.0875	-0.1045	-0.017	0.00823253	0.0226561	0.0144236	0.374	0.424	0.05	-744364	-748798	-4433.96	-744420	-748863	-4443.64	-0.353	-0.406	-0.053	350.697	535.947	678.386	1.43569	16.758	4.603	-959.769	-958.05	-1.719	-0.317	-0.45	0.133
Allyltriisopropylsilane	C-Nucleophile	Dichloromethane	2.04	0.95	-758.6	-762.594	-3.994	-0.337	-0.241	0.096	0.146	0.01	-0.136	0.0955	0.1155	0.02	0.483	0.251	-0.232	-0.0955	-0.1155	-0.02	0.00944125	0.0265742	0.017133	0.868	0.905	0.037	-475783	-478302	-2518.8	-475820	-478344	-2523.44	-0.867	-0.881	-0.014	198.42	287.725	380.542	1.13318	10.84	2.6229	-959.769	-958.05	-1.719	-0.317	-0.45	0.133
Allyltri-n-butylsilane	C-Nucleophile	Dichloromethane	2.09	0.95	-875.753	-880.584	-4.831	-0.338	-0.241	0.097	0.147	0.011	-0.136	0.0955	0.115	0.0195	0.485	0.252	-0.233	-0.0955	-0.115	-0.0195	0.00940232	0.0262401	0.0168378	0.815	0.861	0.046	-549239	-552286	-3046.63	-549283	-552336	-3053.48	-0.838	-0.852	-0.014	240.5	388.346	477.542	1.31462	13.429	3.441	-959.769	-958.05	-1.719	-0.317	-0.45	0.133
Allyltrihexylsilane	C-Nucleophile	Dichloromethane	2.11	0.95	-1110.01	-1116.53	-6.514	-0.338	-0.241	0.097	0.148	0.011	-0.137	0.095	0.115	0.02	0.486	0.252	-0.234	-0.095	-0.115	-0.02	0.00928498	0.0262401	0.0169551	0.953	1.014	0.061	-696122	-700230	-4108.23	-696176	-700294	-4117.54	-0.838	-0.852	-0.014	324.659	517.922	643.793	1.43667	16.139	4.4802	-959.769	-958.05	-1.719	-0.317	-0.45	0.133
2-(Trimethylsilyl)furan	C-Nucleophile	Dichloromethane	2.16	1.1	-635.964	-638.831	-2.867	-0.319	-0.232	0.087	0.143	-0.006	-0.149	0.088	0.119	0.031	0.462	0.226	-0.236	-0.088	-0.119	-0.031	0.00838095	0.0313296	0.0229487	0.79	0.701	-0.089	-398952	-400758	-1805.34	-398983	-400789	-1806.23	-0.321	-0.316	0.005	140.255	220.004	240.926	1.17516	9.591	2.22627	-959.769	-958.05	-1.719	-0.317	-0.45	0.133
2-(Triethylsilyl)furan	C-Nucleophile	Dichloromethane	2.2	1.1	-753.08	-756.789	-3.709	-0.318	-0.231	0.087	0.14	-0.006	-0.146	0.089	0.1185	0.0295	0.458	0.225	-0.233	-0.089	-0.1185	-0.0295	0.00864738	0.031205	0.0225576	0.771	0.692	-0.079	-472384	-474721	-2337.11	-472420	-474758	-2338.2	-0.32	-0.315	0.005	182.335	269.189	321.183	1.18708	10.736	2.56832	-959.769	-958.05	-1.719	-0.317	-0.45	0.133
Methylenecycloheptane	C-Nucleophile	Dichloromethane	2.24	0.9	-311.154	-313.353	-2.199	-0.345	-0.246	0.099	0.149	0.009	-0.14	0.098	0.1185	0.0205	0.494	0.255	-0.239	-0.098	-0.1185	-0.0205	0.00972065	0.0275338	0.0178132	0.827	0.803	-0.024	-195112	-196500	-1388.02	-195137	-196526	-1388.62	-0.361	-0.415	-0.054	110.197	188.932	213.862	1.09263	8.3	1.93809	-959.769	-958.05	-1.719	-0.317	-0.45	0.133
Cyclopenta-1,3-diene	C-Nucleophile	Dichloromethane	2.3	1.06	-192.839	-194.156	-1.317	-0.315	-0.226	0.089	0.13	-0.024	-0.154	0.0925	0.125	0.0325	0.445	0.202	-0.243	-0.0925	-0.125	-0.0325	0.00961376	0.0386757	0.029062	0.489	0.628	0.139	-120944	-121774	-829.803	-120963	-121793	-830.026	-0.404	-0.462	-0.058	66.1011	129.682	124.291	1.0769	6.82	1.34533	-959.769	-958.05	-1.719	-0.317	-0.45	0.133
Methylenecycloundecane	C-Nucleophile	Dichloromethane	2.33	0.9	-467.309	-470.635	-3.326	-0.345	-0.248	0.097	0.153	0.01	-0.143	0.096	0.119	0.023	0.498	0.258	-0.24	-0.096	-0.119	-0.023	0.00925301	0.0274438	0.0181908	0.87	0.875	0.005	-293022	-295121	-2098.38	-293053	-295154	-2100.92	-0.359	-0.411	-0.052	166.303	250.513	314.153	1.12114	10.178	2.5565	-959.769	-958.05	-1.719	-0.317	-0.45	0.133
Alpha-methylstyrene	C-Nucleophile	Dichloromethane	2.35	1	-346.702	-349.056	-2.354	-0.317	-0.235	0.082	0.112	-0.037	-0.149	0.1025	0.136	0.0335	0.429	0.198	-0.231	-0.1025	-0.136	-0.0335	0.012245	0.0467071	0.034462	0.433	0.435	0.002	-217446	-218929	-1483.43	-217472	-218956	-1483.84	-0.515	-0.593	-0.078	118.176	193.564	207.797	1.1411	9.682	2.16572	-959.769	-958.05	-1.719	-0.317	-0.45	0.133
2-(Tributylsilyl)furan	C-Nucleophile	Dichloromethane	2.37	1.1	-987.341	-992.732	-5.391	-0.317	-0.23	0.087	0.143	-0.006	-0.149	0.087	0.118	0.031	0.46	0.224	-0.236	-0.087	-0.118	-0.031	0.00822717	0.0310804	0.0228532	0.713	0.681	-0.032	-619266	-622666	-3399.5	-619316	-622717	-3401.18	-0.279	-0.314	-0.035	266.494	391.223	484.178	1.31223	13.248	3.445	-959.769	-958.05	-1.719	-0.317	-0.45	0.133
1,3-Dimethoxybenzene	C-Nucleophile	Dichloromethane	2.48	1.09	-458.575	-461.421	-2.846	-0.33	-0.226	0.104	0.128	-0.011	-0.139	0.101	0.1185	0.0175	0.458	0.215	-0.243	-0.101	-0.1185	-0.0175	0.0111365	0.0326564	0.0215199	0.303	2.177	1.874	-287643	-289436	-1792.53	-287673	-289464	-1791.04	-0.309	-0.331	-0.022	138.164	205.757	217.085	1.17812	10.36	2.32756	-959.769	-958.05	-1.719	-0.317	-0.45	0.133
Methylenecyclononane	C-Nucleophile	Dichloromethane	2.57	0.9	-389.225	-391.988	-2.763	-0.343	-0.244	0.099	0.145	0.005	-0.14	0.099	0.1195	0.0205	0.488	0.249	-0.239	-0.099	-0.1195	-0.0205	0.010042	0.0286752	0.0186332	0.652	0.62	-0.032	-244062	-245806	-1743.79	-244091	-245835	-1744.58	-0.394	-0.413	-0.019	138.25	216.839	264.177	1.08926	8.621	2.182	-959.769	-958.05	-1.719	-0.317	-0.45	0.133
2-Cyclopropylpropene	C-Nucleophile	Dichloromethane	2.6	1	-233.055	-234.697	-1.642	-0.31	-0.223	0.087	0.126	-0.027	-0.153	0.092	0.125	0.033	0.436	0.196	-0.24	-0.092	-0.125	-0.033	0.00970642	0.0398597	0.0301533	1.079	1.159	0.08	-146145	-147181	-1035.83	-146170	-147206	-1036.18	-0.53	-0.605	-0.075	82.1436	168.291	170.5	1.13197	8.983	1.98777	-959.769	-958.05	-1.719	-0.317	-0.45	0.133
4-Methylpenta-1,3-diene	C-Nucleophile	Dichloromethane	2.6	1	-233.035	-234.675	-1.64	-0.335	-0.237	0.098	0.162	0.013	-0.149	0.0865	0.112	0.0255	0.497	0.25	-0.247	-0.0865	-0.112	-0.0255	0.00752741	0.025088	0.0175606	0.793	0.835	0.042	-146132	-147167	-1035.15	-146156	-147191	-1035.44	-0.527	-0.602	-0.075	82.1436	160.555	166.187	1.09853	7.841	1.74278	-959.769	-958.05	-1.719	-0.317	-0.45	0.133
Methylenecyclopentane	C-Nucleophile	Dichloromethane	2.82	0.9	-233.068	-234.706	-1.638	-0.346	-0.245	0.101	0.154	0.006	-0.148	0.096	0.1195	0.0235	0.5	0.251	-0.249	-0.096	-0.1195	-0.0235	0.009216	0.0284467	0.0192307	0.868	0.814	-0.054	-146152	-147185	-1033.18	-146174	-147208	-1033.53	-0.401	-0.417	-0.016	82.1436	158.164	163.646	1.09335	7.89	1.65532	-959.769	-958.05	-1.719	-0.317	-0.45	0.133
methylenecyclodecane	C-Nucleophile	Dichloromethane	2.82	0.9	-428.262	-431.306	-3.044	-0.344	-0.246	0.098	0.146	0.004	-0.142	0.099	0.121	0.022	0.49	0.25	-0.24	-0.099	-0.121	-0.022	0.010001	0.029282	0.019281	0.764	0.741	-0.023	-268538	-270460	-1921.92	-268568	-270491	-1922.74	-0.395	-0.42	-0.025	152.276	233.189	287.776	1.10644	9.789	2.38636	-959.769	-958.05	-1.719	-0.317	-0.45	0.133
5-cyano-indole	C-Nucleophile	MeCN	2.83	1.1	-453.319	-456.189	-2.87	-0.305	-0.228	0.077	0.096	-0.046	-0.142	0.1045	0.137	0.0325	0.401	0.182	-0.219	-0.1045	-0.137	-0.0325	0.0136163	0.0515632	0.0379469	9.269	9.495	0.226	-284370	-286177	-1806.79	-284396	-286203	-1807.39	-0.303	-0.294	0.009	142.157	194.571	204.044	1.16105	10.885	2.42288	-132.801	-131.97	-0.831	-0.341	-0.475	0.134
(5-methyl-furan-2-yl) pinacol boronate	C-Nucleophile	MeCN	2.9	0.98	-675.999	-680.228	-4.229	-0.317	-0.23	0.087	0.12	-0.027	-0.147	0.0985	0.1285	0.03	0.437	0.203	-0.234	-0.0985	-0.1285	-0.03	0.011101	0.0406706	0.0295696	1.44	1.375	-0.065	-424007	-426671	-2664.39	-424042	-426708	-2665.66	-0.351	-0.325	0.026	208.062	285.885	328.694	1.24142	12.51	2.97717	-132.801	-131.97	-0.831	-0.341	-0.475	0.134
(Z)-1,2-diphenyl-1-(trimethylsiloxy)ethene (in MeCN)	C-Nucleophile	MeCN	3	0.83	-1019.45	-1024.86	-5.411	-0.29	-0.212	0.078	0.089	-0.052	-0.141	0.1005	0.132	0.0315	0.379	0.16	-0.219	-0.1005	-0.132	-0.0315	0.0133249	0.05445	0.0411251	2.015	2.299	0.284	-639490	-642898	-3407.75	-639533	-642943	-3409.28	-0.277	-0.269	0.008	268.426	353.263	432.524	1.27746	13.973	3.3699	-132.801	-131.97	-0.831	-0.341	-0.475	0.134
3-methoxythiophene	C-Nucleophile	MeCN	3.06	1.19	-665.257	-667.622	-2.365	-0.316	-0.221	0.095	0.121	-0.02	-0.141	0.0975	0.1205	0.023	0.437	0.201	-0.236	-0.0975	-0.1205	-0.023	0.0108767	0.03612	0.0252433	2.98	2.506	-0.474	-417384	-418872	-1488.18	-417409	-418897	-1488.19	-0.457	-0.458	-0.001	114.165	160.538	162.312	1.11583	8.53	1.92291	-132.801	-131.97	-0.831	-0.341	-0.475	0.134
(E)-2-methylpenta-1,3-diene	C-Nucleophile	Dichloromethane	3.09	1	-233.057	-234.698	-1.641	-0.316	-0.228	0.088	0.128	-0.026	-0.154	0.094	0.127	0.033	0.444	0.202	-0.242	-0.094	-0.127	-0.033	0.00995045	0.0399233	0.0299728	0.855	0.852	-0.003	-146146	-147182	-1035.27	-146170	-147206	-1035.61	-0.523	-0.6	-0.077	82.1436	168.743	170.747	1.13391	8.987	1.99254	-959.769	-958.05	-1.719	-0.317	-0.45	0.133
1-(phenylethynyl)pyrrolidin-2-one	C-Nucleophile	Dichloromethane	3.12	0.85	-590.241	-593.989	-3.748	-0.305	-0.22	0.085	0.101	-0.043	-0.144	0.102	0.1315	0.0295	0.406	0.177	-0.229	-0.102	-0.1315	-0.0295	0.0128128	0.0488482	0.0360354	5.246	5.013	-0.233	-370239	-372600	-2360.15	-370273	-372633	-2360.49	-0.431	-0.474	-0.043	185.222	264.14	282.991	1.26738	13.341	3.35404	-959.769	-958.05	-1.719	-0.317	-0.45	0.133
N-(triisopropylsilyl)pyrrole	C-Nucleophile	Dichloromethane	3.12	0.93	-850.377	-854.896	-4.519	-0.296	-0.214	0.082	0.145	0.023	-0.122	0.0755	0.0955	0.02	0.441	0.237	-0.204	-0.0755	-0.0955	-0.02	0.00646287	0.019241	0.0127782	2.957	3.081	0.124	-533372	-536220	-2847.78	-533410	-536262	-2852.42	-0.303	-0.303	0	223.43	299.629	394.823	1.15143	10.924	2.6929	-959.769	-958.05	-1.719	-0.317	-0.45	0.133
(2,3-dimethylbut-2-enyl)triethylsilane	C-Nucleophile	Dichloromethane	3.15	1.15	-758.62	-762.614	-3.994	-0.309	-0.214	0.095	0.143	0.022	-0.121	0.083	0.096	0.013	0.452	0.236	-0.216	-0.083	-0.096	-0.013	0.00762058	0.0195254	0.0119048	0.244	0.315	0.071	-475795	-478315	-2519.57	-475838	-478359	-2521.13	-0.842	-0.595	0.247	198.42	301.389	387.112	1.17352	11.254	2.7947	-959.769	-958.05	-1.719	-0.317	-0.45	0.133
(triisopropylsiloxy)ethene	C-Nucleophile	Dichloromethane	3.44	0.94	-794.484	-798.554	-4.07	-0.34	-0.233	0.107	0.144	0.019	-0.125	0.098	0.107	0.009	0.484	0.252	-0.232	-0.098	-0.107	-0.009	0.00992149	0.0227163	0.0127948	2.094	2.212	0.118	-498315	-500882	-2566.74	-498356	-500924	-2568.4	-0.478	-0.49	-0.012	200.393	288.57	368.324	1.1615	10.694	2.5856	-959.769	-958.05	-1.719	-0.317	-0.45	0.133
4-cyanophenyl isocyanide	C-Nucleophile	Dichloromethane	3.57	0.72	-414.238	-416.81	-2.572	-0.361	-0.28	0.081	0.056	-0.086	-0.142	0.1525	0.183	0.0305	0.417	0.194	-0.223	-0.1525	-0.183	-0.0305	0.0278852	0.0863119	0.0584267	1.421	0.848	-0.573	-259868	-261486	-1617.59	-259894	-261512	-1618.18	-0.175	-0.174	0.001	128.131	182.365	184.092	1.16549	11.164	2.4603	-959.769	-958.05	-1.719	-0.317	-0.45	0.133
2-methylfuran	C-Nucleophile	Dichloromethane	3.61	1.11	-267.737	-269.419	-1.682	-0.315	-0.226	0.089	0.164	0.007	-0.157	0.0755	0.1095	0.034	0.479	0.233	-0.246	-0.0755	-0.1095	-0.034	0.00595016	0.0257302	0.01978	0.748	0.725	-0.023	-167938	-168998	-1059.8	-167960	-169020	-1060.22	-0.541	-0.618	-0.077	82.1005	141.677	136.133	1.10725	7.719	1.5564	-959.769	-958.05	-1.719	-0.317	-0.45	0.133
n-butyl vinyl ether	C-Nucleophile	Dichloromethane	3.76	0.91	-309.105	-311.15	-2.045	-0.342	-0.231	0.111	0.16	0.02	-0.14	0.091	0.1055	0.0145	0.502	0.251	-0.251	-0.091	-0.1055	-0.0145	0.00824801	0.0221718	0.0139238	2.369	2.351	-0.018	-193848	-195138	-1289.72	-193875	-195166	-1291.52	-0.482	-0.498	-0.016	100.159	192.723	196.095	1.18089	11.55	2.53478	-959.769	-958.05	-1.719	-0.317	-0.45	0.133
3,3-dimethyl-2-(trimethylsiloxy)buten	C-Nucleophile	Dichloromethane	3.78	0.79	-716.433	-719.939	-3.506	-0.337	-0.232	0.105	0.136	0.022	-0.114	0.1005	0.105	0.0045	0.473	0.254	-0.219	-0.1005	-0.105	-0.0045	0.0106768	0.0217028	0.011026	0.755	1.095	0.34	-449379	-451589	-2210.33	-449416	-451628	-2211.67	-0.519	-0.521	-0.002	172.34	272.156	321.167	1.2002	10.61	2.55822	-959.769	-958.05	-1.719	-0.317	-0.45	0.133
7-azaindole	C-Nucleophile	MeCN	3.87	1.1	-377.56	-379.963	-2.403	-0.304	-0.227	0.077	0.103	-0.04	-0.143	0.1005	0.1335	0.033	0.407	0.187	-0.22	-0.1005	-0.1335	-0.033	0.0124082	0.0476531	0.0352449	2.052	2.197	0.145	-236840	-238352	-1512.57	-236862	-238375	-1512.96	-0.308	-0.304	0.004	118.136	168.247	172.676	1.12215	9.066	1.89903	-132.801	-131.97	-0.831	-0.341	-0.475	0.134
6,6-dimethylfulvene	C-Nucleophile	MeCN	3.93	0.88	-308.797	-310.915	-2.118	-0.31	-0.22	0.09	0.079	-0.066	-0.145	0.1155	0.143	0.0275	0.389	0.154	-0.235	-0.1155	-0.143	-0.0275	0.0171469	0.0663929	0.049246	2.416	2.725	0.309	-193665	-195001	-1335.71	-193691	-195027	-1336.34	-0.532	-0.607	-0.075	106.165	183.191	193.965	1.13069	8.916	2.04052	-132.801	-131.97	-0.831	-0.341	-0.475	0.134
2-methyl-1-(trimethylsiloxy)propen	C-Nucleophile	Dichloromethane	3.94	1	-638.347	-641.295	-2.948	-0.319	-0.214	0.105	0.14	0.031	-0.109	0.0895	0.0915	0.002	0.459	0.245	-0.214	-0.0895	-0.0915	-0.002	0.00872576	0.0170862	0.00836046	1.498	1.656	0.158	-400418	-402276	-1857.18	-400453	-402311	-1858.18	-0.524	-0.601	-0.077	144.287	247.889	271.726	1.22206	10.539	2.5141	-959.769	-958.05	-1.719	-0.317	-0.45	0.133
diazoacetone	C-Nucleophile	Dichloromethane	3.96	0.91	-299.711	-301.486	-1.775	-0.342	-0.249	0.093	0.113	-0.07	-0.183	0.1145	0.1595	0.045	0.455	0.179	-0.276	-0.1145	-0.1595	-0.045	0.0144069	0.0710622	0.0566553	4.422	4.414	-0.008	-188020	-189137	-1116.79	-188044	-189161	-1117.41	-0.59	-0.657	-0.067	84.0767	133.54	123.039	1.11645	8.225	1.77299	-959.769	-958.05	-1.719	-0.317	-0.45	0.133
1H-indole-5-carboxylic acid	C-Nucleophile	MeCN	3.97	1.1	-549.23	-552.547	-3.317	-0.303	-0.226	0.077	0.098	-0.048	-0.146	0.1025	0.137	0.0345	0.401	0.178	-0.223	-0.1025	-0.137	-0.0345	0.0131001	0.0527219	0.0396218	9.515	9.577	0.062	-344544	-346632	-2087.72	-344572	-346660	-2088.29	-0.304	-0.295	0.009	161.157	201.902	216.374	1.15858	10.8	2.5631	-132.801	-131.97	-0.831	-0.341	-0.475	0.134
(2-methylallyl)triphenylsilane	C-Nucleophile	Dichloromethane	4.17	0.79	-1135.06	-1141.34	-6.279	-0.327	-0.236	0.091	0.105	-0.031	-0.136	0.111	0.1335	0.0225	0.432	0.205	-0.227	-0.111	-0.1335	-0.0225	0.0142604	0.0434689	0.0292085	0.96	0.963	0.003	-711999	-715953	-3954.34	-712046	-716001	-3955.69	-0.523	-0.598	-0.075	314.496	395.273	500.312	1.29716	12.427	3.40695	-959.769	-958.05	-1.719	-0.317	-0.45	0.133
isobutylenyl-ethylether	C-Nucleophile	Dichloromethane	4.23	1	-309.112	-311.158	-2.046	-0.323	-0.213	0.11	0.157	0.029	-0.128	0.083	0.092	0.009	0.48	0.242	-0.238	-0.083	-0.092	-0.009	0.00717604	0.0174876	0.0103116	1.579	1.563	-0.016	-193852	-195143	-1290.47	-193880	-195171	-1290.93	-0.523	-0.6	-0.077	100.159	192.743	196.076	1.18109	10.047	2.24538	-959.769	-958.05	-1.719	-0.317	-0.45	0.133
2,3-dihydrofuran	C-Nucleophile	Dichloromethane	4.37	0.9	-229.85	-231.288	-1.438	-0.327	-0.217	0.11	0.162	0.027	-0.135	0.0825	0.095	0.0125	0.489	0.244	-0.245	-0.0825	-0.095	-0.0125	0.00695936	0.0184939	0.0115345	1.57	1.495	-0.075	-144167	-145074	-906.899	-144188	-145095	-907.162	-0.372	-0.428	-0.056	70.0898	125.883	119.919	1.07061	6.643	1.33187	-959.769	-958.05	-1.719	-0.317	-0.45	0.133
5-bromo-indole	C-Nucleophile	MeCN	4.38	1.1	-2933.34	-2937.46	-4.119	-0.3	-0.222	0.078	0.108	-0.031	-0.139	0.096	0.1265	0.0305	0.408	0.191	-0.217	-0.096	-0.1265	-0.0305	0.0112941	0.0418907	0.0305966	5.806	5.794	-0.012	-1.84061e+06	-1.8432e+06	-2589.37	-1.84064e+06	-1.84323e+06	-2589.94	-0.316	-0.305	0.011	196.044	195.683	207.665	1.15407	10.539	2.5356	-132.801	-131.97	-0.831	-0.341	-0.475	0.134
(2-methylallyl)trimethylsilane	C-Nucleophile	Dichloromethane	4.41	0.96	-563.423	-566.01	-2.587	-0.334	-0.236	0.098	0.139	0.014	-0.125	0.0975	0.111	0.0135	0.473	0.25	-0.223	-0.0975	-0.111	-0.0135	0.0100489	0.024642	0.0145931	0.903	0.959	0.056	-353407	-355038	-1630.84	-353439	-355070	-1631.64	-0.838	-0.596	0.242	128.287	223.193	257.418	1.14071	9.495	2.20256	-959.769	-958.05	-1.719	-0.317	-0.45	0.133
5-chloro-indole	C-Nucleophile	MeCN	4.42	1.1	-820.479	-823.539	-3.06	-0.3	-0.222	0.078	0.108	-0.031	-0.139	0.096	0.1265	0.0305	0.408	0.191	-0.217	-0.096	-0.1265	-0.0305	0.0112941	0.0418907	0.0305966	5.831	5.899	0.068	-514773	-516698	-1924.94	-514799	-516724	-1925.49	-0.318	-0.305	0.013	151.593	190.094	200.337	1.14828	10.288	2.3958	-132.801	-131.97	-0.831	-0.341	-0.475	0.134
1,2-bis(trimethylsiloxy)cyclohexene	C-Nucleophile	Dichloromethane	4.46	1.15	-1197.46	-1202.75	-5.285	-0.31	-0.206	0.104	0.13	0.019	-0.111	0.09	0.0935	0.0035	0.44	0.225	-0.215	-0.09	-0.0935	-0.0035	0.00920455	0.0194272	0.0102227	0.845	0.645	-0.2	-751169	-754499	-3329.23	-751216	-754547	-3330.76	-0.362	-0.419	-0.057	258.505	352.212	448.457	1.24331	12.224	3.02276	-959.769	-958.05	-1.719	-0.317	-0.45	0.133
2,6-dimethylphenyl isocyanide	C-Nucleophile	Dichloromethane	4.59	0.87	-400.577	-403.201	-2.624	-0.337	-0.258	0.079	0.097	-0.049	-0.146	0.12	0.1535	0.0335	0.434	0.209	-0.225	-0.12	-0.1535	-0.0335	0.0165899	0.056369	0.0397792	3.996	4.304	0.308	-251257	-252910	-1652.71	-251285	-252938	-1653.55	-0.514	-0.593	-0.079	131.174	200.809	216.294	1.15259	9.166	2.15541	-959.769	-958.05	-1.719	-0.317	-0.45	0.133
1-(trimethylsiloxy)buta-1,3-diene	C-Nucleophile	Dichloromethane	4.6	0.9	-637.16	-640.064	-2.904	-0.304	-0.212	0.092	0.135	-0.02	-0.155	0.0845	0.116	0.0315	0.439	0.192	-0.247	-0.0845	-0.116	-0.0315	0.0081324	0.0350417	0.0269093	2.83	3.279	0.449	-399688	-401518	-1829.43	-399722	-401552	-1830.31	-0.375	-0.397	-0.022	142.271	242.316	260.463	1.22878	11.974	2.72676	-959.769	-958.05	-1.719	-0.317	-0.45	0.133
N-(3,3-dimethylbut-1-en-2-yl)acetamide	C-Nucleophile	MeCN	4.61	0.98	-441.108	-443.994	-2.886	-0.353	-0.239	0.114	0.148	-0.012	-0.16	0.1025	0.1255	0.023	0.501	0.227	-0.274	-0.1025	-0.1255	-0.023	0.0104853	0.0346922	0.0242069	5.061	4.533	-0.528	-276645	-278465	-1819.55	-276676	-278496	-1820.13	-0.604	-0.673	-0.069	141.211	217.619	248.692	1.1381	9.531	2.34367	-132.801	-131.97	-0.831	-0.341	-0.475	0.134
pyrrole	C-Nucleophile	Dichloromethane	4.63	1	-208.866	-210.231	-1.365	-0.304	-0.218	0.086	0.161	0.032	-0.129	0.0715	0.093	0.0215	0.465	0.25	-0.215	-0.0715	-0.093	-0.0215	0.00549704	0.017298	0.011801	2.436	2.435	-0.001	-131008	-131868	-860.041	-131027	-131887	-860.256	-0.31	-0.311	-0.001	67.0892	122.93	114.888	1.0758	6.745	1.28825	-959.769	-958.05	-1.719	-0.317	-0.45	0.133
2-(trimethylsiloxy)buta-1,3-diene	C-Nucleophile	Dichloromethane	4.83	0.9	-637.16	-640.062	-2.902	-0.322	-0.229	0.093	0.12	-0.032	-0.152	0.101	0.1305	0.0295	0.442	0.197	-0.245	-0.101	-0.1305	-0.0295	0.0115396	0.043224	0.0316844	1.087	1.489	0.402	-399689	-401517	-1828.29	-399722	-401551	-1828.82	-0.479	-0.348	0.131	142.271	233.006	257.899	1.18939	9.952	2.29931	-959.769	-958.05	-1.719	-0.317	-0.45	0.133
N-(3,4-dihydronaphthalen-1-yl)acetamide	C-Nucleophile	MeCN	4.91	0.87	-413.65	-416.064	-2.414	-0.346	-0.251	0.095	0.121	-0.072	-0.193	0.1125	0.1615	0.049	0.467	0.179	-0.288	-0.1125	-0.1615	-0.049	0.0135506	0.0728554	0.0593049	2.856	3.167	0.311	-259494	-261013	-1519.22	-259520	-261040	-1519.84	-0.402	-0.312	0.09	114.103	170.262	163.429	1.17802	10.599	2.3087	-132.801	-131.97	-0.831	-0.341	-0.475	0.134
ethyl diazoacetate	C-Nucleophile	Dichloromethane	4.91	0.95	-591.464	-595.257	-3.793	-0.305	-0.224	0.081	0.098	-0.045	-0.143	0.1035	0.1345	0.031	0.403	0.179	-0.224	-0.1035	-0.1345	-0.031	0.0132906	0.0505314	0.0372408	5.681	5.218	-0.463	-370992	-373381	-2389.06	-371024	-373413	-2389.73	-0.605	-0.673	-0.068	187.238	251.583	287.605	1.19419	10.842	2.74644	-959.769	-958.05	-1.719	-0.317	-0.45	0.133
N-vinylcarbazole	C-Nucleophile	Dichloromethane	5.02	0.94	-591.135	-595.01	-3.875	-0.285	-0.212	0.073	0.089	-0.044	-0.133	0.098	0.128	0.03	0.374	0.168	-0.206	-0.098	-0.128	-0.03	0.0128396	0.0487619	0.0359223	1.121	1.007	-0.114	-370796	-373236	-2439.71	-370826	-373266	-2440.4	-0.387	-0.421	-0.034	193.244	252.994	289.47	1.19572	11.357	2.68379	-959.769	-958.05	-1.719	-0.317	-0.45	0.133
1-(trimethylsiloxy)-3,4-dihydronaphthalene (in MeCN)	C-Nucleophile	MeCN	5.06	0.91	-866.785	-871.2	-4.415	-0.296	-0.213	0.083	0.105	-0.035	-0.14	0.0955	0.124	0.0285	0.401	0.178	-0.223	-0.0955	-0.124	-0.0285	0.0113719	0.043191	0.0318191	1.55	1.937	0.387	-543723	-546503	-2780.65	-543761	-546542	-2781.09	-0.33	-0.389	-0.059	218.367	304.427	358.357	1.24794	12.103	3.00197	-132.801	-131.97	-0.831	-0.341	-0.475	0.134
1-(tris(trimethylsilyl)siloxy)cyclohexene	C-Nucleophile	Dichloromethane	5.07	0.91	-1819.9	-1826.92	-7.019	-0.311	-0.219	0.092	0.116	-0.013	-0.129	0.0975	0.116	0.0185	0.427	0.206	-0.221	-0.0975	-0.116	-0.0185	0.0111314	0.0326602	0.0215288	0.755	1.513	0.758	-1.14167e+06	-1.14609e+06	-4421.43	-1.14173e+06	-1.14615e+06	-4424.56	-0.369	-0.434	-0.065	344.788	419.245	610.921	1.2043	13.162	3.34159	-959.769	-958.05	-1.719	-0.317	-0.45	0.133
(Z)-1-phenyl-1-(trimethylsiloxy)propene (in MeCN)	C-Nucleophile	MeCN	5.18	0.94	-828.899	-833.077	-4.178	-0.307	-0.221	0.086	0.111	-0.032	-0.143	0.098	0.1265	0.0285	0.418	0.189	-0.229	-0.098	-0.1265	-0.0285	0.011488	0.042334	0.030846	1.492	1.612	0.12	-519954	-522586	-2631.83	-519993	-522626	-2633.31	-0.52	-0.601	-0.081	206.356	294.98	351.858	1.22406	11.411	2.82265	-132.801	-131.97	-0.831	-0.341	-0.475	0.134
1-(trimethylsiloxy)cyclohexene	C-Nucleophile	Dichloromethane	5.21	1	-712.953	-716.331	-3.378	-0.322	-0.239	0.083	0.127	-0.015	-0.142	0.0975	0.127	0.0295	0.449	0.224	-0.225	-0.0975	-0.127	-0.0295	0.010586	0.0360022	0.0254162	1.592	1.722	0.13	-447240	-449367	-2127.14	-447273	-449402	-2128.54	-0.265	-0.26	0.005	166.292	248.719	282.287	1.19538	11.311	2.57013	-959.769	-958.05	-1.719	-0.317	-0.45	0.133
diphenyldiazomethane	C-Nucleophile	MeCN	5.29	0.92	-607.079	-611.008	-3.929	-0.272	-0.201	0.071	0.103	-0.063	-0.166	0.0845	0.132	0.0475	0.375	0.138	-0.237	-0.0845	-0.132	-0.0475	0.00952033	0.0631304	0.0536101	1.623	1.699	0.076	-380810	-383283	-2473.06	-380842	-383316	-2473.69	0.199	-0.212	-0.411	194.232	257.619	287.963	1.22183	12.06	2.92018	-132.801	-131.97	-0.831	-0.341	-0.475	0.134
2-(triisopropylsiloxy)propene	C-Nucleophile	Dichloromethane	5.38	0.85	-833.535	-837.886	-4.351	-0.335	-0.23	0.105	0.142	0.02	-0.122	0.0965	0.105	0.0085	0.477	0.25	-0.227	-0.0965	-0.105	-0.0085	0.00976127	0.02205	0.0122887	0.701	0.885	0.184	-522801	-525545	-2743.89	-522843	-525589	-2745.45	-0.536	-0.609	-0.073	214.42	304.41	394.597	1.17025	10.148	2.63807	-959.769	-958.05	-1.719	-0.317	-0.45	0.133
2-phenyl-allyltrimethylsilane	C-Nucleophile	Dichloromethane	5.38	0.89	-753.972	-757.79	-3.818	-0.314	-0.227	0.087	0.114	-0.038	-0.152	0.1	0.1325	0.0325	0.428	0.189	-0.239	-0.1	-0.1325	-0.0325	0.0116822	0.0464451	0.0347629	0.65	0.693	0.043	-472941	-475346	-2404.83	-472978	-475383	-2404.79	-0.821	-0.852	-0.031	190.357	280.584	336.611	1.19922	12.02	2.91509	-959.769	-958.05	-1.719	-0.317	-0.45	0.133
3-methyl-2-(trimethylsiloxy)but-1-ene	C-Nucleophile	Dichloromethane	5.41	0.9	-599.305	-601.97	-2.665	-0.339	-0.232	0.107	0.14	0.022	-0.118	0.0995	0.105	0.0055	0.479	0.254	-0.225	-0.0995	-0.105	-0.0055	0.0103343	0.0217028	0.0113685	0.729	0.99	0.261	-375939	-377617	-1678.65	-375970	-377650	-1679.24	-0.537	-0.611	-0.074	130.26	220.574	242.047	1.17456	9.451	2.14847	-959.769	-958.05	-1.719	-0.317	-0.45	0.133
2-(trimethylsiloxy)propene	C-Nucleophile	Dichloromethane	5.41	0.91	-475.469	-478.472	-3.003	-0.282	-0.202	0.08	0.129	-0.013	-0.142	0.0765	0.1075	0.031	0.411	0.189	-0.222	-0.0765	-0.1075	-0.031	0.00711953	0.0305721	0.0234526	1.528	1.499	-0.029	-298247	-300138	-1891.13	-298273	-300165	-1891.73	-0.302	-0.302	0	147.174	206.005	220.493	1.16736	9.986	2.27422	-959.769	-958.05	-1.719	-0.317	-0.45	0.133
4-methoxy-indole	C-Nucleophile	MeCN	5.41	1.1	-677.391	-680.617	-3.226	-0.338	-0.232	0.106	0.138	0.02	-0.118	0.1	0.106	0.006	0.476	0.252	-0.224	-0.1	-0.106	-0.006	0.0105042	0.0222937	0.0117894	0.695	1.009	0.314	-424899	-426932	-2033.03	-424935	-426968	-2033.77	-0.209	-0.239	-0.03	158.313	258.236	295.876	1.20282	10.563	2.51438	-132.801	-131.97	-0.831	-0.341	-0.475	0.134
Indole	C-Nucleophile	Dichloromethane	5.55	1.09	-361.555	-363.915	-2.36	-0.29	-0.213	0.077	0.12	-0.02	-0.14	0.085	0.1165	0.0315	0.41	0.193	-0.217	-0.085	-0.1165	-0.0315	0.00881098	0.0351613	0.0263503	2.727	2.899	0.172	-226788	-228275	-1486.19	-226811	-228298	-1486.61	-0.314	-0.306	0.008	117.148	174.471	181.764	1.12454	9.098	1.93704	-959.769	-958.05	-1.719	-0.317	-0.45	0.133
2-(tert.butyldimethylsiloxy)propene	C-Nucleophile	Dichloromethane	5.58	0.9	-716.424	-719.932	-3.508	-0.338	-0.232	0.106	0.139	0.021	-0.118	0.0995	0.1055	0.006	0.477	0.253	-0.224	-0.0995	-0.1055	-0.006	0.0103776	0.0219965	0.0116189	0.645	0.868	0.223	-449373	-451584	-2211.05	-449410	-451623	-2212.16	-0.537	-0.61	-0.073	172.34	264.06	318.628	1.17067	10.618	2.45463	-959.769	-958.05	-1.719	-0.317	-0.45	0.133
Z-3-(trimethylsiloxy)pent-2-ene	C-Nucleophile	Dichloromethane	5.58	1	-677.39	-680.616	-3.226	-0.328	-0.225	0.103	0.138	0.023	-0.115	0.095	0.101	0.006	0.466	0.248	-0.218	-0.095	-0.101	-0.006	0.00968348	0.0205665	0.0108831	1.187	1.298	0.111	-424898	-426931	-2033.46	-424934	-426969	-2034.8	-0.52	-0.6	-0.08	158.313	249.094	295.823	1.16037	9.808	2.35753	-959.769	-958.05	-1.719	-0.317	-0.45	0.133
N-(1-(4-chlorophenyl)vinyl)acetamide	C-Nucleophile	MeCN	5.6	1	-973.453	-977.429	-3.976	-0.322	-0.236	0.086	0.09	-0.53	-0.62	0.116	0.383	0.267	0.412	-0.294	-0.706	-0.116	-0.383	-0.267	0.0163301	-0.249471	-0.265801	4.067	3.506	-0.561	-610724	-613226	-2502.28	-610757	-613259	-2502.9	-0.606	-0.674	-0.068	195.645	245.326	271.252	1.21083	12.273	3.20336	-132.801	-131.97	-0.831	-0.341	-0.475	0.134
N-(cyclohex-1-en-1-yl)acetamide	C-Nucleophile	MeCN	5.64	0.79	-437.504	-440.264	-2.76	-0.321	-0.225	0.096	0.134	-0.024	-0.158	0.0935	0.1245	0.031	0.455	0.201	-0.254	-0.0935	-0.1245	-0.031	0.00960687	0.0385578	0.028951	3.843	3.565	-0.278	-274429	-276168	-1738.49	-274457	-276196	-1739.09	-0.612	-0.679	-0.067	135.163	198.377	209.935	1.16151	9.578	2.3798	-132.801	-131.97	-0.831	-0.341	-0.475	0.134
N-(1-phenylvinyl)acetamide	C-Nucleophile	MeCN	5.73	0.97	-514.531	-517.808	-3.277	-0.32	-0.234	0.086	0.098	-0.046	-0.144	0.111	0.14	0.029	0.418	0.188	-0.23	-0.111	-0.14	-0.029	0.014738	0.0521277	0.0373896	4.781	4.314	-0.467	-322740	-324804	-2063.39	-322771	-324835	-2063.67	-0.605	-0.674	-0.069	161.2	229.626	252.618	1.18841	11.106	2.71974	-132.801	-131.97	-0.831	-0.341	-0.475	0.134
N-methylindole	C-Nucleophile	Dichloromethane	5.75	1.23	-400.592	-403.233	-2.641	-0.287	-0.209	0.078	0.119	-0.021	-0.14	0.084	0.115	0.031	0.406	0.188	-0.218	-0.084	-0.115	-0.031	0.00868966	0.0351729	0.0264832	3.056	3.218	0.162	-251265	-252929	-1663.81	-251291	-252955	-1664.47	-0.315	-0.305	0.01	131.174	195.106	209.755	1.14301	9.631	2.09965	-959.769	-958.05	-1.719	-0.317	-0.45	0.133
1-(triphenylsiloxy)cyclopentene	C-Nucleophile	Dichloromethane	5.76	1.02	-1247.86	-1254.73	-6.871	-0.329	-0.227	0.102	0.102	-0.037	-0.139	0.1135	0.132	0.0185	0.431	0.19	-0.241	-0.1135	-0.132	-0.0185	0.0149446	0.0458526	0.030908	1.662	1.805	0.143	-782774	-787100	-4326.35	-782822	-787150	-4328.19	-0.335	-0.392	-0.057	342.506	421.492	523.556	1.34195	13.181	3.52383	-959.769	-958.05	-1.719	-0.317	-0.45	0.133
N-methylpyrrole	C-Nucleophile	Dichloromethane	5.85	1.03	-247.903	-249.549	-1.646	-0.302	-0.216	0.086	0.16	0.027	-0.133	0.071	0.0945	0.0235	0.462	0.243	-0.219	-0.071	-0.0945	-0.0235	0.00545563	0.018375	0.0129194	2.774	2.752	-0.022	-155484	-156522	-1037.48	-155506	-156544	-1037.78	-0.243	-0.305	-0.062	81.1158	146.314	143.664	1.10317	7.738	1.56628	-959.769	-958.05	-1.719	-0.317	-0.45	0.133
5-methyl-indole	C-Nucleophile	MeCN	6	1.1	-400.601	-403.243	-2.642	-0.29	-0.212	0.078	0.12	-0.019	-0.139	0.085	0.1155	0.0305	0.41	0.193	-0.217	-0.085	-0.1155	-0.0305	0.00881098	0.0345602	0.0257493	2.513	2.659	0.146	-251271	-252935	-1663.88	-251297	-252961	-1664.51	-0.504	-0.582	-0.078	131.174	196.712	209.723	1.15254	10.117	2.19985	-132.801	-131.97	-0.831	-0.341	-0.475	0.134
2-(tris(trimethylsilyl)siloxy)propene	C-Nucleophile	Dichloromethane	6.04	0.82	-1703.93	-1710.15	-6.226	-0.32	-0.221	0.099	0.114	-0.014	-0.128	0.103	0.1175	0.0145	0.434	0.207	-0.227	-0.103	-0.1175	-0.0145	0.0122224	0.0333484	0.0211261	0.836	1.043	0.207	-1.06894e+06	-1.07286e+06	-3920.42	-1.069e+06	-1.07292e+06	-3922.79	-0.536	-0.609	-0.073	304.724	390.734	547.992	1.20676	11.256	3.04887	-959.769	-958.05	-1.719	-0.317	-0.45	0.133
5-chloro-2-methylindole	C-Nucleophile	MeCN	6.08	1.1	-859.53	-862.871	-3.341	-0.293	-0.217	0.076	0.111	-0.028	-0.139	0.091	0.1225	0.0315	0.404	0.189	-0.215	-0.091	-0.1225	-0.0315	0.0102488	0.0396991	0.0294503	6.51	6.63	0.12	-539259	-541361	-2101.91	-539286	-541389	-2102.64	-0.533	-0.609	-0.076	165.62	213.657	228.884	1.18094	11.223	2.66632	-132.801	-131.97	-0.831	-0.341	-0.475	0.134
benzyl (1-phenylvinyl)carbamate	C-Nucleophile	MeCN	6.21	0.87	-819.017	-824.161	-5.144	-0.319	-0.235	0.084	0.101	-0.043	-0.144	0.109	0.139	0.03	0.42	0.192	-0.228	-0.109	-0.139	-0.03	0.014144	0.0503151	0.0361711	2.809	2.395	-0.414	-513747	-516986	-3239.55	-513786	-517027	-3240.33	-0.353	-0.389	-0.036	253.296	331.537	376.845	1.31426	13.261	3.39412	-132.801	-131.97	-0.831	-0.341	-0.475	0.134
1-phenyl-1-(trimethylsiloxy)ethene	C-Nucleophile	Dichloromethane	6.22	0.96	-789.853	-793.751	-3.898	-0.312	-0.226	0.086	0.104	-0.038	-0.142	0.104	0.132	0.028	0.416	0.188	-0.228	-0.104	-0.132	-0.028	0.013	0.0463404	0.0333404	0.967	1.348	0.381	-495472	-497927	-2454.53	-495509	-497964	-2455.85	-0.488	-0.487	0.001	192.33	281.228	323.184	1.23504	12.144	2.95375	-959.769	-958.05	-1.719	-0.317	-0.45	0.133
5-methoxy-indole	C-Nucleophile	Dichloromethane	6.22	1.12	-475.462	-478.467	-3.005	-0.286	-0.204	0.082	0.115	-0.022	-0.137	0.0855	0.113	0.0275	0.401	0.182	-0.219	-0.0855	-0.113	-0.0275	0.00911502	0.0350797	0.0259646	3.614	3.463	-0.151	-298243	-300135	-1892.05	-298270	-300162	-1892.43	-0.33	-0.314	0.016	147.174	206.488	220.572	1.16981	11.338	2.42976	-959.769	-958.05	-1.719	-0.317	-0.45	0.133
lithium (5-methylthiophen-2-yl)(4-(trifluoromethyl)phenyl)pinacolborate	C-Nucleophile	MeCN	6.24	1	-1572.05	-1579.65	-7.595	-0.301	-0.214	0.087	0.043	-0.024	-0.067	0.129	0.119	-0.01	0.344	0.19	-0.154	-0.129	-0.119	0.01	0.0241875	0.0372658	0.0130783	15.189	14.93	-0.259	-986220	-991001	-4780.85	-986271	-991054	-4782.92	-0.273	-0.462	-0.189	376.17	401.902	522.158	1.28186	14.416	3.89758	-132.801	-131.97	-0.831	-0.341	-0.475	0.134
N-(1-(naphthalen-2-yl)vinyl)acetamide	C-Nucleophile	MeCN	6.28	0.95	-667.213	-671.484	-4.271	-0.296	-0.225	0.071	0.076	-0.062	-0.138	0.11	0.1435	0.0335	0.372	0.163	-0.209	-0.11	-0.1435	-0.0335	0.0162634	0.0631664	0.046903	4.833	4.435	-0.398	-418517	-421206	-2689.79	-418551	-421242	-2690.62	-0.61	-0.676	-0.066	211.259	276.421	318.861	1.22488	11.952	3.04877	-132.801	-131.97	-0.831	-0.341	-0.475	0.134
lithium 2-benzyl-2-(3,5-bis(trifluoromethyl)phenyl)-4,4,5,5-tetramethyl-1,3,2-dioxaborolan-2-uide	C-Nucleophile	MeCN	6.3	0.78	-1626.2	-1635.33	-9.138	-0.315	-0.211	0.104	0.042	-0.038	-0.08	0.1365	0.1245	-0.012	0.357	0.173	-0.184	-0.1365	-0.1245	0.012	0.0260956	0.0447984	0.0187028	15.161	15.01	-0.151	-1.02015e+06	-1.0259e+06	-5752.34	-1.02021e+06	-1.02596e+06	-5754.12	-0.649	-0.685	-0.036	452.167	459.805	599.243	1.33791	14.963	4.27007	-132.801	-131.97	-0.831	-0.341	-0.475	0.134
1-(trimethylsiloxy)cyclopentene (in MeCN)	C-Nucleophile	MeCN	6.43	0.89	-676.224	-679.405	-3.181	-0.322	-0.218	0.104	0.14	0.029	-0.111	0.091	0.0945	0.0035	0.462	0.247	-0.215	-0.091	-0.0945	-0.0035	0.00896212	0.0180774	0.00911531	1.049	1.332	0.283	-424181	-426185	-2004.2	-424214	-426219	-2005.09	-0.33	-0.422	-0.092	156.298	247.401	279.152	1.19793	10.69	2.49838	-132.801	-131.97	-0.831	-0.341	-0.475	0.134
5-hydroxy-indole	C-Nucleophile	MeCN	6.44	1.1	-436.438	-439.16	-2.722	-0.29	-0.207	0.083	0.114	-0.023	-0.137	0.088	0.115	0.027	0.404	0.184	-0.22	-0.088	-0.115	-0.027	0.00958416	0.0359375	0.0263533	4.273	4.082	-0.191	-273774	-275488	-1714.08	-273799	-275514	-1714.42	-0.272	-0.317	-0.045	133.147	183.12	192.054	1.13774	9.984	2.17581	-132.801	-131.97	-0.831	-0.341	-0.475	0.134
potassium (1-(tert-butoxycarbonyl)-1H-indol-2-yl)trifluoroborate	C-Nucleophile	MeCN	6.46	0.96	-1627.36	-1633.94	-6.584	-0.291	-0.215	0.076	0.027	-0.027	-0.054	0.132	0.121	-0.011	0.318	0.188	-0.13	-0.132	-0.121	0.011	0.0273962	0.0389388	0.0115426	12.795	12.363	-0.432	-1.021e+06	-1.02514e+06	-4142.1	-1.02104e+06	-1.02519e+06	-4143.11	-0.288	-0.274	0.014	323.16	351.436	416.399	1.30346	13.471	3.50427	-132.801	-131.97	-0.831	-0.341	-0.475	0.134
lithium (5-methylthiophen-2-yl)(4-(trifluoromethyl)phenyl)catecholglycolborate	C-Nucleophile	MeCN	6.5	0.77	-1567.38	-1574.81	-7.428	-0.275	-0.185	0.09	0.04	-0.025	-0.065	0.1175	0.105	-0.0125	0.315	0.16	-0.155	-0.1175	-0.105	0.0125	0.0219147	0.0344531	0.0125384	23.008	23.054	0.046	-983350	-988022	-4672.4	-983399	-988074	-4674.72	-0.164	-0.266	-0.102	368.107	404.029	487.875	1.34833	14.431	4.07452	-132.801	-131.97	-0.831	-0.341	-0.475	0.134
1,2-dimethylindole	C-Nucleophile	Dichloromethane	6.54	1.1	-439.641	-442.563	-2.922	-0.281	-0.205	0.076	0.122	-0.017	-0.139	0.0795	0.111	0.0315	0.403	0.188	-0.215	-0.0795	-0.111	-0.0315	0.0078415	0.0327686	0.0249271	3.565	3.747	0.182	-275749	-277590	-1841.14	-275777	-277619	-1841.68	-0.334	-0.313	0.021	145.201	214.814	236.797	1.16074	10.108	2.29164	-959.769	-958.05	-1.719	-0.317	-0.45	0.133
N-(1-(p-tolyl)vinyl)acetamide	C-Nucleophile	Dichloromethane	6.57	0.91	-553.578	-557.135	-3.557	-0.312	-0.23	0.082	0.101	-0.043	-0.144	0.1055	0.1365	0.031	0.413	0.187	-0.226	-0.1055	-0.1365	-0.031	0.0134749	0.0498189	0.036344	5.165	4.766	-0.399	-347223	-349464	-2241.2	-347258	-349499	-2241.41	-0.605	-0.674	-0.069	175.227	251.989	280.605	1.21593	12.271	2.97853	-959.769	-958.05	-1.719	-0.317	-0.45	0.133
1-(trimethylsiloxy)cyclopentene	C-Nucleophile	MeCN	6.57	0.93	-676.224	-679.405	-3.181	-0.321	-0.217	0.104	0.14	0.03	-0.11	0.0905	0.0935	0.003	0.461	0.247	-0.214	-0.0905	-0.0935	-0.003	0.00888313	0.0176969	0.00881373	0.975	1.25	0.275	-424181	-426185	-2004.21	-424214	-426219	-2005.05	-0.329	-0.422	-0.093	156.298	247.415	279.136	1.19804	10.69	2.49827	-132.801	-131.97	-0.831	-0.341	-0.475	0.134
6-(4-dimethylamino-phenyl)fulvene	C-Nucleophile	MeCN	6.72	0.87	-593.414	-597.379	-3.965	-0.272	-0.197	0.075	0.056	-0.079	-0.135	0.108	0.138	0.03	0.328	0.118	-0.21	-0.108	-0.138	-0.03	0.0177805	0.0806949	0.0629144	5	8.673	3.673	-372196	-374694	-2498	-372230	-374729	-2499.08	-0.255	-0.268	-0.013	197.276	281.824	321.014	1.24323	14.409	3.45403	-132.801	-131.97	-0.831	-0.341	-0.475	0.134
lithium (5-methylthiophen-2-yl)(4-chlorophenyl)pinacolborate	C-Nucleophile	Dichloromethane	6.77	0.88	-1695.26	-1702.13	-6.866	-0.297	-0.211	0.086	0.043	-0.012	-0.055	0.127	0.1115	-0.0155	0.34	0.199	-0.141	-0.127	-0.1115	0.0155	0.0237191	0.0312368	0.00751769	14.155	13.941	-0.214	-1.06355e+06	-1.06787e+06	-4322.03	-1.06359e+06	-1.06792e+06	-4324.61	-0.427	-0.432	-0.005	342.617	390.402	507.109	1.2697	12.647	3.59932	-959.769	-958.05	-1.719	-0.317	-0.45	0.133
potassium trifluoro(furan-3-yl)borate	C-Nucleophile	MeCN	6.83	0.93	-1150.64	-1154.19	-3.548	-0.316	-0.23	0.086	0.027	-0.01	-0.037	0.1445	0.12	-0.0245	0.343	0.22	-0.123	-0.1445	-0.12	0.0245	0.0304377	0.0327273	0.00228959	16.343	15.641	-0.702	-721985	-724215	-2229.56	-722016	-724246	-2230.59	-0.46	0.114	0.574	173.97	186.711	199.062	1.13266	8.478	2.27309	-132.801	-131.97	-0.831	-0.341	-0.475	0.134
2-methylindole	C-Nucleophile	MeCN	6.91	1.1	-400.607	-403.247	-2.64	-0.285	-0.209	0.076	0.122	-0.018	-0.14	0.0815	0.1135	0.032	0.407	0.191	-0.216	-0.0815	-0.1135	-0.032	0.00816001	0.0337232	0.0255632	3.404	3.613	0.209	-251275	-252938	-1663.05	-251300	-252964	-1663.64	-0.532	-0.608	-0.076	131.174	198.065	210.341	1.15819	10.132	2.21457	-132.801	-131.97	-0.831	-0.341	-0.475	0.134
1,1-dimethyl-2-methylenehydrazine (in CH2Cl2)	C-Nucleophile	Dichloromethane	6.98	0.85	-227.151	-228.649	-1.498	-0.337	-0.218	0.119	0.156	0.002	-0.154	0.0905	0.108	0.0175	0.493	0.22	-0.273	-0.0905	-0.108	-0.0175	0.00830654	0.0265091	0.0182025	2.309	2.4	0.091	-142459	-143404	-944.566	-142481	-143426	-945.026	-0.294	-0.394	-0.1	72.109	140.708	136.579	1.09728	7.656	1.52761	-959.769	-958.05	-1.719	-0.317	-0.45	0.133
lithium (5-methylthiophen-2-yl)(4-methylphenyl)pinacolborate	C-Nucleophile	MeCN	6.98	0.93	-1275.38	-1281.83	-6.448	-0.294	-0.209	0.085	0.043	-0.004	-0.047	0.1255	0.1065	-0.019	0.337	0.205	-0.132	-0.1255	-0.1065	0.019	0.0233683	0.027664	0.0042957	12.438	12.409	-0.029	-800044	-804105	-4060.96	-800091	-804154	-4062.67	-0.423	-0.428	-0.005	322.199	396.803	516.291	1.27517	13.199	3.4127	-132.801	-131.97	-0.831	-0.341	-0.475	0.134
N-(1-(4-methoxyphenyl)vinyl)acetamide	C-Nucleophile	MeCN	7.06	0.85	-628.442	-632.362	-3.92	-0.303	-0.221	0.082	0.105	-0.041	-0.146	0.099	0.131	0.032	0.408	0.18	-0.228	-0.099	-0.131	-0.032	0.012011	0.0476694	0.0356584	6.429	6.215	-0.214	-394197	-396666	-2468.67	-394232	-396701	-2469.3	-0.61	-0.676	-0.066	191.226	259.234	291.753	1.21882	12.391	2.97985	-132.801	-131.97	-0.831	-0.341	-0.475	0.134
N-(cyclopent-1-en-1-yl)acetamide	C-Nucleophile	MeCN	7.06	0.87	-400.901	-403.461	-2.56	-0.327	-0.218	0.109	0.15	-0.008	-0.158	0.0885	0.113	0.0245	0.477	0.21	-0.267	-0.0885	-0.113	-0.0245	0.00820991	0.0304024	0.0221925	4.915	4.408	-0.507	-251448	-253062	-1613.55	-251476	-253090	-1614.15	-0.609	-0.674	-0.065	125.168	191.935	206.858	1.13491	9.68	2.30244	-132.801	-131.97	-0.831	-0.341	-0.475	0.134
lithium 2-benzyl-4,4,5,5-tetramethyl-2-(4-(trifluoromethyl)phenyl)-1,3,2-dioxaborolan-2-uide (in MeCN)	C-Nucleophile	MeCN	7.15	0.77	-1251.42	-1258.85	-7.428	-0.295	-0.193	0.102	0.036	-0.016	-0.052	0.1295	0.1045	-0.025	0.331	0.177	-0.154	-0.1295	-0.1045	0.025	0.0253327	0.0308482	0.00551546	30.993	30.883	-0.11	-785002	-789679	-4677.02	-785055	-789734	-4678.87	-0.677	-0.708	-0.031	370.143	435.363	554.278	1.33441	15.145	3.89384	-132.801	-131.97	-0.831	-0.341	-0.475	0.134
(p-nitrophenyl)diazomethane	C-Nucleophile	Dichloromethane	7.17	0.83	-581.016	-584.464	-3.448	-0.297	-0.225	0.072	0.048	-0.099	-0.147	0.1245	0.162	0.0375	0.345	0.126	-0.219	-0.1245	-0.162	-0.0375	0.0224641	0.104143	0.0816787	7.15	7.212	0.062	-364508	-366677	-2168.43	-364537	-366706	-2169.02	-0.262	-0.195	0.067	163.133	196.879	205.359	1.1698	11.286	2.80872	-959.769	-958.05	-1.719	-0.317	-0.45	0.133
(S,E)-5-benzyl-2,2,3-trimethyl-1-styrylimidazolidin-4-one	C-Nucleophile	MeCN	7.2	1.14	-993.215	-999.69	-6.475	-0.279	-0.193	0.086	0.111	-0.03	-0.141	0.084	0.1115	0.0275	0.39	0.163	-0.227	-0.084	-0.1115	-0.0275	0.00904615	0.0381357	0.0290896	5.333	5.458	0.125	-622967	-627046	-4079.26	-623015	-627096	-4081.27	-0.533	-0.601	-0.068	320.428	403.235	497.248	1.32872	14.952	3.93597	-132.801	-131.97	-0.831	-0.341	-0.475	0.134
2-(trimethylsiloxy)furan	C-Nucleophile	Dichloromethane	7.22	1	-710.885	-714.109	-3.224	-0.303	-0.21	0.093	0.14	0.019	-0.121	0.0815	0.0955	0.014	0.443	0.229	-0.214	-0.0815	-0.0955	-0.014	0.0074969	0.0199132	0.0124163	2.537	2.794	0.257	-445962	-447992	-2029.61	-445995	-448025	-2030.2	-0.442	-0.412	0.03	156.254	228.025	250.915	1.18546	10.537	2.42026	-959.769	-958.05	-1.719	-0.317	-0.45	0.133
5-amino-indole	C-Nucleophile	MeCN	7.22	1.1	-416.603	-419.289	-2.686	-0.278	-0.194	0.084	0.118	-0.018	-0.136	0.08	0.106	0.026	0.396	0.176	-0.22	-0.08	-0.106	-0.026	0.00808081	0.0319205	0.0238396	2.617	2.265	-0.352	-261319	-263011	-1691.76	-261344	-263037	-1692.23	-0.334	-0.32	0.014	132.163	189.201	199.991	1.14421	10.099	2.1851	-132.801	-131.97	-0.831	-0.341	-0.475	0.134
2,5-dimethylindole	C-Nucleophile	MeCN	7.22	1.1	-439.652	-442.574	-2.922	-0.283	-0.208	0.075	0.123	-0.016	-0.139	0.08	0.112	0.032	0.406	0.192	-0.214	-0.08	-0.112	-0.032	0.00788177	0.0326667	0.0247849	3.043	3.216	0.173	-275756	-277597	-1840.82	-275784	-277626	-1841.53	-0.532	-0.607	-0.075	145.201	220.302	238.326	1.1853	11.116	2.46642	-132.801	-131.97	-0.831	-0.341	-0.475	0.134
5-methoxy-2-methylindole	C-Nucleophile	MeCN	7.26	1.1	-514.515	-517.799	-3.284	-0.286	-0.203	0.083	0.117	-0.02	-0.137	0.0845	0.1115	0.027	0.403	0.183	-0.22	-0.0845	-0.1115	-0.027	0.00885887	0.0339679	0.025109	4.088	3.919	-0.169	-322729	-324798	-2068.76	-322759	-324828	-2069.33	-0.533	-0.608	-0.075	161.2	230.085	249.121	1.20191	12.254	2.69522	-132.801	-131.97	-0.831	-0.341	-0.475	0.134
potassium trifluoro(3-methoxy-thiophen-2-yl)borate	C-Nucleophile	MeCN	7.32	0.9	-1587.22	-1591.73	-4.511	-0.318	-0.229	0.089	0.028	-0.014	-0.042	0.145	0.1215	-0.0235	0.346	0.215	-0.131	-0.145	-0.1215	0.0235	0.0303829	0.0343308	0.00394787	16.629	15.322	-1.307	-995922	-998757	-2834.99	-995957	-998792	-2835	-0.353	-0.387	-0.034	220.062	223.355	252.377	1.15669	9.613	2.45669	-132.801	-131.97	-0.831	-0.341	-0.475	0.134
lithium (5-methylthiophen-2-yl)(4-methoxyphenyl)pinacolborate	C-Nucleophile	MeCN	7.51	0.87	-1350.25	-1357.06	-6.81	-0.288	-0.206	0.082	0.043	-0.004	-0.047	0.1225	0.105	-0.0175	0.331	0.202	-0.129	-0.1225	-0.105	0.0175	0.0226681	0.0272896	0.00462155	11.117	11.12	0.003	-847018	-851307	-4289.01	-847066	-851357	-4291.13	-0.423	-0.429	-0.006	338.198	406.702	527.343	1.28865	14.062	3.58378	-132.801	-131.97	-0.831	-0.341	-0.475	0.134
(p-cyanophenyl)diazomethane	C-Nucleophile	Dichloromethane	7.66	0.8	-469.246	-472.172	-2.926	-0.291	-0.22	0.071	0.073	-0.07	-0.143	0.109	0.145	0.036	0.364	0.15	-0.214	-0.109	-0.145	-0.036	0.0163201	0.0700833	0.0537633	6.63	6.573	-0.057	-294375	-296215	-1840.39	-294402	-296243	-1841.02	-0.256	-0.199	0.057	143.145	195.048	201.123	1.17514	11.528	2.71934	-959.769	-958.05	-1.719	-0.317	-0.45	0.133
6-(julolidin-9-yl)fulvene	C-Nucleophile	MeCN	7.79	1.06	-747.276	-752.273	-4.997	-0.267	-0.19	0.077	0.056	-0.078	-0.134	0.1055	0.134	0.0285	0.323	0.112	-0.211	-0.1055	-0.134	-0.0285	0.0172295	0.0801607	0.0629312	4.908	9.478	4.57	-468696	-471845	-3148.84	-468732	-471882	-3150.05	-0.332	-0.375	-0.043	249.35	325.383	390.86	1.25884	14.336	3.56411	-132.801	-131.97	-0.831	-0.341	-0.475	0.134
N-methylenepyrrolidin-1-amine (in CH2Cl2)	C-Nucleophile	Dichloromethane	7.84	0.89	-304.075	-306.088	-2.013	-0.329	-0.21	0.119	0.154	0.006	-0.148	0.0875	0.102	0.0145	0.483	0.216	-0.267	-0.0875	-0.102	-0.0145	0.00792572	0.0240833	0.0161576	2.449	2.862	0.413	-190705	-191975	-1269.79	-190729	-191999	-1270.28	-0.331	-0.214	0.117	98.1463	167.021	173.349	1.11108	8.883	1.82401	-959.769	-958.05	-1.719	-0.317	-0.45	0.133
(S,E)-3-benzyl-1-methyl-4-styryl-1,4-diazaspiro[4.4]nonan-2-one	C-Nucleophile	MeCN	7.92	1.07	-1070.13	-1077.12	-6.991	-0.281	-0.193	0.088	0.109	-0.031	-0.14	0.086	0.112	0.026	0.39	0.162	-0.228	-0.086	-0.112	-0.026	0.00948205	0.038716	0.029234	5.437	5.551	0.114	-671205	-675611	-4405.41	-671254	-675661	-4407.28	-0.34	-0.413	-0.073	346.465	424.091	531.565	1.33663	15.005	4.01915	-132.801	-131.97	-0.831	-0.341	-0.475	0.134
N,N-Dimethylbarbituric acid iodonium ylide (in CHCl2)	C-Nucleophile	Dichloromethane	7.98	0.71	-40.209	-40.534	-0.325	-0.546	-0.394	0.152	0.163	0.055	-0.108	0.1915	0.1695	-0.022	0.709	0.449	-0.26	-0.1915	-0.1695	0.022	0.025862	0.0319936	0.00613164	0	0	0	-25199.9	-25405.1	-205.263	-25213.1	-25418.4	-205.284	-0.7	-0.796	-0.096	16.0425	70.8448	54.2802	1.02204	4.181	0.546746	-959.769	-958.05	-1.719	-0.317	-0.45	0.133
2,5-dimethylpyrrole	C-Nucleophile	MeCN	8.01	0.96	-286.965	-288.891	-1.926	-0.285	-0.2	0.085	0.157	0.033	-0.124	0.064	0.0835	0.0195	0.442	0.233	-0.209	-0.064	-0.0835	-0.0195	0.00463348	0.0149619	0.0103284	2.8	2.754	-0.046	-179977	-181191	-1214.09	-180001	-181215	-1214.67	-0.319	-0.316	0.003	95.1424	170.561	172.254	1.13943	8.915	1.85897	-132.801	-131.97	-0.831	-0.341	-0.475	0.134
lithium (5-methylfuran-2-yl)(4-(trifluoromethyl)phenyl)pinacolborate	C-Nucleophile	MeCN	8.13	0.85	-1249.39	-1256.67	-7.274	-0.287	-0.202	0.085	0.043	-0.022	-0.065	0.122	0.112	-0.01	0.33	0.18	-0.15	-0.122	-0.112	0.01	0.0225515	0.0348444	0.0122929	14.985	14.78	-0.205	-783746	-788326	-4579.86	-783796	-788379	-4582.07	0.104	0.066	-0.038	360.105	400.841	510.639	1.29763	13.344	3.818	-132.801	-131.97	-0.831	-0.341	-0.475	0.134
5-(tris(pentafluorophenyl)siloxy)-2,3-dihydrofuran	C-Nucleophile	Dichloromethane	8.16	0.67	-2766.75	-2779.5	-12.75	-0.325	-0.218	0.107	0.068	-0.068	-0.136	0.1285	0.143	0.0145	0.393	0.15	-0.243	-0.1285	-0.143	-0.0145	0.021008	0.0681633	0.0471554	2.908	2.618	-0.29	-1.73598e+06	-1.74399e+06	-8012.25	-1.73605e+06	-1.74406e+06	-8015.56	-0.385	-0.413	-0.028	614.335	449.64	545.984	1.39209	13.75	4.05118	-959.769	-958.05	-1.719	-0.317	-0.45	0.133
1-phenoxy-1-(trimethylsiloxy)ethene	C-Nucleophile	MeCN	8.23	0.81	-864.727	-868.985	-4.258	-0.328	-0.232	0.096	0.125	-0.017	-0.142	0.1015	0.1245	0.023	0.453	0.215	-0.238	-0.1015	-0.1245	-0.023	0.0113711	0.0360471	0.024676	2.955	3.06	0.105	-542452	-545134	-2681.49	-542491	-545173	-2681.95	-0.573	-0.56	0.013	208.329	293.99	337.098	1.25531	12.122	2.92933	-132.801	-131.97	-0.831	-0.341	-0.475	0.134
ethyl (E)-3-(N-morpholino)acrylate	C-Nucleophile	MeCN	8.52	0.8	-628.738	-632.581	-3.843	-0.319	-0.216	0.103	0.127	-0.026	-0.153	0.096	0.121	0.025	0.446	0.19	-0.256	-0.096	-0.121	-0.025	0.0103318	0.0385289	0.0281971	4.791	5.102	0.311	-394370	-396792	-2421.64	-394404	-396826	-2422.46	-0.513	-0.46	0.053	185.22	259.81	285.69	1.23875	12.826	3.22593	-132.801	-131.97	-0.831	-0.341	-0.475	0.134
1,2,5-trimethylpyrrole	C-Nucleophile	MeCN	8.69	1.07	-325.999	-328.207	-2.208	-0.283	-0.199	0.084	0.153	0.034	-0.119	0.065	0.0825	0.0175	0.436	0.233	-0.203	-0.065	-0.0825	-0.0175	0.00484518	0.0146057	0.0097605	3.086	3.038	-0.048	-204451	-205843	-1392.2	-204477	-205870	-1392.69	-0.316	-0.313	0.003	109.169	185.894	198.267	1.13072	8.881	1.9244	-132.801	-131.97	-0.831	-0.341	-0.475	0.134
lithium 2-allyl-2-(3,5-bis(trifluoromethyl)phenyl)-4,4,5,5-tetramethyl-1,3,2-dioxaborolan-2-uide (in MeCN)	C-Nucleophile	MeCN	8.71	0.8	-1434.46	-1442.32	-7.864	-0.321	-0.21	0.111	0.042	-0.04	-0.082	0.1395	0.125	-0.0145	0.363	0.17	-0.193	-0.1395	-0.125	0.0145	0.0268048	0.0459559	0.0191511	15.598	15.602	0.004	-899883	-904833	-4949.29	-899936	-904886	-4950.51	-0.695	-0.725	-0.03	388.082	394.631	506.497	1.28449	12.737	3.68446	-132.801	-131.97	-0.831	-0.341	-0.475	0.134
(E)-4-(1,2-diphenylvinyl)morpholine (in MeCN)	C-Nucleophile	MeCN	8.78	0.83	-822.163	-827.514	-5.351	-0.289	-0.198	0.091	0.1	-0.043	-0.143	0.0945	0.1205	0.026	0.389	0.155	-0.234	-0.0945	-0.1205	-0.026	0.0114785	0.0468395	0.035361	1.088	1.489	0.401	-515684	-519056	-3371.93	-515723	-519096	-3373.02	-0.283	-0.295	-0.012	265.349	339.956	409.44	1.27512	13.325	3.39912	-132.801	-131.97	-0.831	-0.341	-0.475	0.134
(p-bromophenyl)diazomethane	C-Nucleophile	Dichloromethane	8.87	0.82	-2949.27	-2953.44	-4.174	-0.284	-0.21	0.074	0.099	-0.064	-0.163	0.0925	0.137	0.0445	0.383	0.146	-0.237	-0.0925	-0.137	-0.0445	0.01117	0.0642774	0.0531074	2.808	2.646	-0.162	-1.85062e+06	-1.85324e+06	-2622.95	-1.85065e+06	-1.85327e+06	-2623.45	-0.239	-0.199	0.04	197.032	196.19	204.758	1.16799	11.18	2.82539	-959.769	-958.05	-1.719	-0.317	-0.45	0.133
lithium 2-benzyl-4,4,5,5-tetramethyl-2-phenyl-1,3,2-dioxaborolan-2-uide (in MeCN)	C-Nucleophile	MeCN	8.92	0.7	-915.727	-921.727	-6	-0.297	-0.201	0.096	0.042	-0.003	-0.045	0.1275	0.102	-0.0255	0.339	0.198	-0.141	-0.1275	-0.102	0.0255	0.0239768	0.0262727	0.00229596	14.533	14.658	0.125	-574353	-578134	-3780.67	-574399	-578181	-3782.58	-0.679	-0.709	-0.03	302.145	380.59	501.836	1.24644	12.875	3.28929	-132.801	-131.97	-0.831	-0.341	-0.475	0.134
(trimethylsilyl)diazomethane	C-Nucleophile	Dichloromethane	8.97	0.75	-555.171	-557.536	-2.365	-0.315	-0.22	0.095	0.14	-0.042	-0.182	0.0875	0.131	0.0435	0.455	0.178	-0.277	-0.0875	-0.131	-0.0435	0.00841346	0.0482051	0.0397916	1.607	2.441	0.834	-348279	-349768	-1488.77	-348308	-349798	-1489.79	-0.724	-0.645	0.079	114.221	190.447	201.519	1.14592	8.671	2.03611	-959.769	-958.05	-1.719	-0.317	-0.45	0.133
1-methoxy-2-methyl-1-(trimethylsiloxy)propene	C-Nucleophile	Dichloromethane	9	0.98	-752.258	-755.847	-3.589	-0.31	-0.205	0.105	0.137	0.025	-0.112	0.0865	0.09	0.0035	0.447	0.23	-0.217	-0.0865	-0.09	-0.0035	0.00836941	0.0176087	0.00923929	3.025	3.084	0.059	-471875	-474136	-2261.35	-471912	-474175	-2262.61	-0.509	-0.59	-0.081	174.313	258.247	306.535	1.17482	10.47	2.45306	-959.769	-958.05	-1.719	-0.317	-0.45	0.133
1-methoxy-2-methyl-1-(trimethylsiloxy)propene (in MeCN)	C-Nucleophile	MeCN	9.11	0.88	-752.259	-755.848	-3.589	-0.312	-0.206	0.106	0.137	0.025	-0.112	0.0875	0.0905	0.003	0.449	0.231	-0.218	-0.0875	-0.0905	-0.003	0.00852589	0.0177278	0.00920192	3.177	3.242	0.065	-471876	-474137	-2261.3	-471913	-474175	-2262.58	-0.51	-0.591	-0.081	174.313	258.211	306.53	1.17467	10.469	2.4531	-132.801	-131.97	-0.831	-0.341	-0.475	0.134
phenyldiazomethane	C-Nucleophile	Dichloromethane	9.35	0.83	-377.486	-379.901	-2.415	-0.28	-0.207	0.073	0.109	-0.061	-0.17	0.0855	0.134	0.0485	0.389	0.146	-0.243	-0.0855	-0.134	-0.0485	0.00939621	0.0614932	0.0520969	1.346	1.594	0.248	-236795	-238315	-1519.66	-236820	-238340	-1520.12	-0.232	-0.222	0.01	118.136	174.876	178.83	1.13945	9.74	2.23792	-959.769	-958.05	-1.719	-0.317	-0.45	0.133
ethyl (E)-3-(dimethylamino)acrylate	C-Nucleophile	Dichloromethane	9.43	0.8	-476.945	-479.912	-2.967	-0.311	-0.213	0.098	0.136	-0.02	-0.156	0.0875	0.1165	0.029	0.447	0.193	-0.254	-0.0875	-0.1165	-0.029	0.00856404	0.0351613	0.0265972	6.479	6.7	0.221	-299148	-301018	-1870.33	-299180	-301051	-1871.35	-0.539	-0.585	-0.046	143.184	229.338	240.252	1.22731	11.629	2.71995	-959.769	-958.05	-1.719	-0.317	-0.45	0.133
1,1-diethoxyethene	C-Nucleophile	Dichloromethane	9.81	0.81	-383.989	-386.393	-2.404	-0.329	-0.221	0.108	0.151	0.04	-0.111	0.089	0.0905	0.0015	0.48	0.261	-0.219	-0.089	-0.0905	-0.0015	0.00825104	0.0156901	0.00743909	2.782	2.682	-0.1	-240834	-242350	-1515.93	-240862	-242379	-1516.68	-0.624	-0.6	0.024	116.158	200.122	206.996	1.18279	9.317	2.13577	-959.769	-958.05	-1.719	-0.317	-0.45	0.133
(E)-1-(1,2-diphenylvinyl)piperidine (in MeCN)	C-Nucleophile	MeCN	9.94	0.86	-786.339	-791.612	-5.273	-0.287	-0.195	0.092	0.101	-0.042	-0.143	0.093	0.1185	0.0255	0.388	0.153	-0.235	-0.093	-0.1185	-0.0255	0.0111456	0.0458897	0.0347441	1.631	2.82	1.189	-493189	-496512	-3323.2	-493228	-496552	-3324.31	-0.287	-0.301	-0.014	263.377	349.137	424.789	1.27782	13.907	3.39927	-132.801	-131.97	-0.831	-0.341	-0.475	0.134
alpha-(N-morpholino)styrene	C-Nucleophile	Dichloromethane	9.96	0.79	-592.568	-596.405	-3.837	-0.311	-0.213	0.098	0.113	-0.031	-0.144	0.099	0.122	0.023	0.424	0.182	-0.242	-0.099	-0.122	-0.023	0.0115578	0.0408901	0.0293323	1.045	0.898	-0.147	-371668	-374086	-2417.92	-371699	-374118	-2418.7	-0.444	-0.469	-0.025	189.254	258.424	299.806	1.19315	11.812	2.82767	-959.769	-958.05	-1.719	-0.317	-0.45	0.133
morpholinoisobutylene	C-Nucleophile	Dichloromethane	10.04	0.82	-441.062	-443.945	-2.883	-0.344	-0.212	0.132	0.152	0.017	-0.135	0.096	0.0975	0.0015	0.496	0.229	-0.267	-0.096	-0.0975	-0.0015	0.00929032	0.020756	0.0114657	1.813	1.505	-0.308	-276614	-278433	-1818.69	-276644	-278463	-1819.02	-0.529	-0.607	-0.078	141.211	221.665	247.64	1.16254	10.142	2.44839	-959.769	-958.05	-1.719	-0.317	-0.45	0.133
lithium (5-methylthiophen-2-yl)(3,5-bis(trifluoromethyl)phenyl)neopentylglycolborate	C-Nucleophile	MeCN	10.13	0.91	-1868.72	-1877.46	-8.742	-0.304	-0.218	0.086	0.042	-0.042	-0.084	0.131	0.13	-0.001	0.346	0.176	-0.17	-0.131	-0.13	0.001	0.0247991	0.0480114	0.0232122	15.44	15.034	-0.406	-1.17239e+06	-1.17789e+06	-5500.6	-1.17245e+06	-1.17795e+06	-5503.61	-0.45	-0.454	-0.004	430.142	422.067	533.15	1.32761	13.224	3.83787	-132.801	-131.97	-0.831	-0.341	-0.475	0.134
(E)-1-styryl-2-tritylpyrrolidine (in CH2Cl2)	C-Nucleophile	Dichloromethane	10.19	1.06	-1245.48	-1253.79	-8.307	-0.263	-0.182	0.081	0.105	-0.034	-0.139	0.079	0.108	0.029	0.368	0.148	-0.22	-0.079	-0.108	-0.029	0.00847962	0.0394054	0.0309258	3.708	4.671	0.963	-781190	-786424	-5233.99	-781242	-786479	-5236.78	-0.373	-0.347	0.026	415.569	476.901	628.738	1.34391	16.727	3.97235	-959.769	-958.05	-1.719	-0.317	-0.45	0.133
1-butoxy-1-(trimethylsiloxy)ethene	C-Nucleophile	Dichloromethane	10.21	0.82	-791.312	-795.177	-3.865	-0.327	-0.218	0.109	0.138	0.029	-0.109	0.0945	0.0945	0	0.465	0.247	-0.218	-0.0945	-0.0945	0	0.00960242	0.0180774	0.00847501	2.931	2.938	0.007	-496362	-498797	-2435.81	-496402	-498839	-2436.77	-0.609	-0.606	0.003	188.339	300.306	338.773	1.27805	13.415	3.18213	-959.769	-958.05	-1.719	-0.317	-0.45	0.133
alpha-(N-morpholino)styrene (in MeCN)	C-Nucleophile	MeCN	10.3	0.8	-592.569	-596.406	-3.837	-0.311	-0.214	0.097	0.112	-0.031	-0.143	0.0995	0.1225	0.023	0.423	0.183	-0.24	-0.0995	-0.1225	-0.023	0.0117024	0.0410007	0.0292983	1.068	0.929	-0.139	-371669	-374087	-2417.83	-371700	-374119	-2418.6	-0.446	-0.472	-0.026	189.254	258.4	299.8	1.19306	11.814	2.82819	-132.801	-131.97	-0.831	-0.341	-0.475	0.134
(E)-1-(2-(4-nitrophenyl)-1-phenylvinyl)pyrrolidine (in MeCN)	C-Nucleophile	MeCN	10.42	0.82	-950.823	-956.853	-6.03	-0.279	-0.196	0.083	0.051	-0.092	-0.143	0.114	0.144	0.03	0.33	0.104	-0.226	-0.114	-0.144	-0.03	0.0196909	0.0996923	0.0800014	11.141	15.034	3.893	-596420	-600218	-3797.6	-596462	-600261	-3798.8	-0.389	-0.341	0.048	294.348	354.837	425.642	1.29695	14.758	3.84545	-132.801	-131.97	-0.831	-0.341	-0.475	0.134
MeO-Breslow 1b	C-Nucleophile	THF	10.45	0.81	-1141.6	-1147.08	-5.485	-0.258	-0.179	0.079	0.107	-0.035	-0.142	0.0755	0.107	0.0315	0.365	0.144	-0.221	-0.0755	-0.107	-0.0315	0.00780856	0.0397535	0.0319449	3.066	2.671	-0.395	-716172	-719625	-3452.84	-716210	-719664	-3453.78	0.213	0.056	-0.157	269.361	321.315	383.16	1.2597	14.048	3.30419	-232.511	-231.032	-1.479	-0.246	-0.404	0.158
diazomethane	C-Nucleophile	Dichloromethane	10.48	0.78	-147.884	-148.784	-0.9	-0.324	-0.226	0.098	0.139	-0.05	-0.189	0.0925	0.138	0.0455	0.463	0.176	-0.287	-0.0925	-0.138	-0.0455	0.00924001	0.0541023	0.0448623	1.676	2	0.324	-92774.9	-93340.9	-565.957	-92791.9	-93358.1	-566.16	-0.443	-0.437	0.006	42.04	85.1272	67.6057	1.06089	5.835	1.04941	-959.769	-958.05	-1.719	-0.317	-0.45	0.133
2-(trimethylsiloxy)-5,6-dihydro-4H-pyran (in MeCN)	C-Nucleophile	MeCN	10.52	0.78	-751.11	-754.651	-3.541	-0.313	-0.208	0.105	0.141	0.031	-0.11	0.086	0.0885	0.0025	0.454	0.239	-0.215	-0.086	-0.0885	-0.0025	0.00814537	0.0163855	0.00824009	2.266	2.195	-0.071	-471168	-473399	-2230.78	-471202	-473434	-2231.6	-0.412	-0.392	0.02	172.297	256.651	289.721	1.21231	11.142	2.54265	-132.801	-131.97	-0.831	-0.341	-0.475	0.134
(S,E)-2-(diphenyl(trimethylsiloxy)methyl)-1-styrylpyrrolidine	C-Nucleophile	MeCN	10.56	1.01	-1498.1	-1506.71	-8.613	-0.27	-0.185	0.085	0.111	-0.029	-0.14	0.0795	0.107	0.0275	0.381	0.156	-0.225	-0.0795	-0.107	-0.0275	0.00829429	0.0366955	0.0284012	4.049	5.22	1.171	-939694	-945120	-5425.7	-939751	-945180	-5428.42	-0.365	-0.351	0.014	427.653	490.429	665.498	1.33066	16.017	4.01103	-132.801	-131.97	-0.831	-0.341	-0.475	0.134
2-(trimethylsiloxy)-5,6-dihydro-4H-pyran	C-Nucleophile	Dichloromethane	10.61	0.86	-751.109	-754.65	-3.541	-0.312	-0.206	0.106	0.141	0.031	-0.11	0.0855	0.0875	0.002	0.453	0.237	-0.216	-0.0855	-0.0875	-0.002	0.00806871	0.0161524	0.00808372	2.164	2.087	-0.077	-471168	-473398	-2230.82	-471202	-473434	-2231.68	-0.41	-0.39	0.02	172.297	256.662	289.681	1.21247	11.142	2.54228	-959.769	-958.05	-1.719	-0.317	-0.45	0.133
(E)-4-(2-phenyl-2-(pyrrolidin-1-yl)vinyl)benzonitrile (in MeCN)	C-Nucleophile	MeCN	10.63	0.84	-839.052	-844.559	-5.507	-0.278	-0.191	0.087	0.076	-0.058	-0.134	0.101	0.1245	0.0235	0.354	0.133	-0.221	-0.101	-0.1245	-0.0235	0.0144082	0.0582716	0.0438634	10.26	13.019	2.759	-526286	-529755	-3468.74	-526327	-529797	-3470.02	-0.375	-0.347	0.028	274.36	353.119	421.484	1.29914	15.222	3.69121	-132.801	-131.97	-0.831	-0.341	-0.475	0.134
2,4-dimethylpyrrole	C-Nucleophile	MeCN	10.67	0.91	-286.962	-288.889	-1.927	-0.29	-0.205	0.085	0.158	0.036	-0.122	0.066	0.0845	0.0185	0.448	0.241	-0.207	-0.066	-0.0845	-0.0185	0.00486161	0.0148138	0.00995219	2.398	2.389	-0.009	-179975	-181189	-1214.33	-179999	-181214	-1215.02	-0.527	-0.604	-0.077	95.1424	170.62	172.303	1.13962	8.836	1.87786	-132.801	-131.97	-0.831	-0.341	-0.475	0.134
anion of 2-nitropropane (in water)	C-Nucleophile	Water	10.69	0.56	-321.323	-323.244	-1.921	-0.27	-0.156	0.114	0.169	0.043	-0.126	0.0505	0.0565	0.006	0.439	0.199	-0.24	-0.0505	-0.0565	-0.006	0.00290461	0.00802073	0.00511612	8.32	6.968	-1.352	-201567	-202776	-1209.37	-201591	-202801	-1209.71	-0.523	-0.602	-0.079	88.0852	138.45	133.128	1.09825	7.142	1.62605	-76.455	-76.055	-0.4	-0.304	-0.505	0.201
1-(phenylmethylamino)cyclohexene	C-Nucleophile	Dichloromethane	10.73	0.81	-556.739	-560.499	-3.76	-0.289	-0.192	0.097	0.131	-0.012	-0.143	0.079	0.102	0.023	0.42	0.18	-0.24	-0.079	-0.102	-0.023	0.00742976	0.0289	0.0214702	1.051	2.002	0.951	-349170	-351540	-2370.39	-349202	-351574	-2371.35	-0.253	-0.228	0.025	187.281	269.473	315.382	1.20285	11.857	2.85789	-959.769	-958.05	-1.719	-0.317	-0.45	0.133
(E)-beta-(N-morpholino)styrene	C-Nucleophile	Dichloromethane	10.76	0.87	-592.573	-596.412	-3.839	-0.28	-0.191	0.089	0.112	-0.028	-0.14	0.084	0.1095	0.0255	0.392	0.163	-0.229	-0.084	-0.1095	-0.0255	0.009	0.0367799	0.0277799	0.971	2.002	1.031	-371671	-374090	-2419.33	-371703	-374123	-2420.35	-0.331	-0.332	-0.001	189.254	266.382	301.288	1.22586	13.108	3.40156	-959.769	-958.05	-1.719	-0.317	-0.45	0.133
lithium 2-allyl-4,4,5,5-tetramethyl-2-phenyl-1,3,2-dioxaborolan-2-uide (in MeCN)	C-Nucleophile	MeCN	11.2	0.64	-763.029	-768.034	-5.005	-0.306	-0.202	0.104	0.042	-0.001	-0.043	0.132	0.1015	-0.0305	0.348	0.201	-0.147	-0.132	-0.1015	0.0305	0.0250345	0.0256275	0.000593005	14.198	14.144	-0.054	-478567	-481722	-3154.64	-478608	-481764	-3156.15	-0.698	-0.728	-0.03	252.086	336.118	434.802	1.21121	11.908	2.96693	-132.801	-131.97	-0.831	-0.341	-0.475	0.134
lithium (5-methylthiophen-2-yl)(3,5-bis(trifluoromethyl)phenyl)glycolborate	C-Nucleophile	MeCN	11.23	0.77	-1751.58	-1759.48	-7.899	-0.302	-0.215	0.087	0.041	-0.041	-0.082	0.1305	0.128	-0.0025	0.343	0.174	-0.169	-0.1305	-0.128	0.0025	0.0248254	0.0470805	0.022255	15.076	15.227	0.151	-1.09895e+06	-1.10392e+06	-4968.3	-1.099e+06	-1.10397e+06	-4969.95	-0.436	-0.439	-0.003	388.062	383.949	460.949	1.33074	13.145	3.70244	-132.801	-131.97	-0.831	-0.341	-0.475	0.134
anion of nitroethane (in water)	C-Nucleophile	Water	11.25	0.52	-282.279	-283.917	-1.638	-0.279	-0.164	0.115	0.179	0.038	-0.141	0.05	0.063	0.013	0.458	0.202	-0.256	-0.05	-0.063	-0.013	0.00272926	0.00982426	0.007095	6.843	5.635	-1.208	-177086	-178117	-1031.16	-177107	-178139	-1031.68	-0.531	-0.612	-0.081	74.0587	117.347	105.625	1.08613	7.133	1.47953	-76.455	-76.055	-0.4	-0.304	-0.505	0.201
5-(triphenylsiloxy)-2,3-dihydrofuran	C-Nucleophile	Dichloromethane	11.28	0.91	-1322.74	-1329.98	-7.232	-0.318	-0.212	0.106	0.105	-0.034	-0.139	0.1065	0.123	0.0165	0.423	0.178	-0.245	-0.1065	-0.123	-0.0165	0.0134069	0.0424972	0.0290903	2.045	2.089	0.044	-829759	-834313	-4553.63	-829809	-834364	-4554.69	-0.391	-0.374	0.017	358.505	435.543	535.136	1.36661	13.651	3.57333	-959.769	-958.05	-1.719	-0.317	-0.45	0.133
anion of triethyl methanetricarboxylate (in DMSO)	C-Nucleophile	DMSO	15.33	0.72	-836.964	-841.849	-4.885	-0.294	-0.191	0.103	0.153	0.02	-0.133	0.0705	0.0855	0.015	0.447	0.211	-0.236	-0.0705	-0.0855	-0.015	0.00555956	0.0173229	0.0117633	8.007	7.161	-0.846	-525026	-528102	-3075.81	-525068	-528145	-3076.78	-0.651	-0.524	0.127	231.222	308.964	335.101	1.32448	13.764	3.0717	-553.272	-551.617	-1.655	-0.237	-0.369	0.132
(Z)-1-(1,3-dimesityl-1H-imidazol-3-ium-2-yl)-2-phenylprop-1-en-1-olate (in THF)	C-Nucleophile	THF	15.33	0.79	-1338.71	-1347.53	-8.814	-0.244	-0.167	0.077	0.115	-0.034	-0.149	0.0645	0.1005	0.036	0.359	0.133	-0.226	-0.0645	-0.1005	-0.036	0.00579422	0.0379709	0.0321766	11.58	11.582	0.002	-839672	-845225	-5552.91	-839731	-845288	-5556.18	-0.504	-0.591	-0.087	436.588	509.594	671.356	1.37461	16.854	4.04558	-232.511	-231.032	-1.479	-0.246	-0.404	0.158
anion of ethyl cyanoacetate (in water)	C-Nucleophile	Water	15.57	0.58	-397.222	-399.582	-2.36	-0.279	-0.179	0.1	0.172	0.045	-0.127	0.0535	0.067	0.0135	0.451	0.224	-0.227	-0.0535	-0.067	-0.0135	0.00317323	0.0100201	0.00684686	11.157	10.633	-0.524	-249185	-250671	-1485.66	-249212	-250698	-1486.49	-0.759	-0.675	0.084	112.107	170.662	166.47	1.16637	10.268	2.26496	-76.455	-76.055	-0.4	-0.304	-0.505	0.201
Dexoxy Breslow intermediate 6	C-Nucleophile	THF	15.58	0.57	-1027.69	-1032.54	-4.841	-0.26	-0.184	0.076	0.11	-0.034	-0.144	0.075	0.109	0.034	0.37	0.15	-0.22	-0.075	-0.109	-0.034	0.00760135	0.0396033	0.032002	2.781	2.684	-0.097	-644719	-647767	-3047.66	-644754	-647802	-3048.41	-0.36	-0.354	0.006	239.335	293.727	343.95	1.23748	14.15	3.31824	-232.511	-231.032	-1.479	-0.246	-0.404	0.158
anion of 2-phenylmalononitrile (in DMSO)	C-Nucleophile	DMSO	15.58	1	-452.826	-455.696	-2.87	-0.248	-0.172	0.076	0.137	-0.004	-0.141	0.0555	0.088	0.0325	0.385	0.168	-0.217	-0.0555	-0.088	-0.0325	0.00400032	0.0230476	0.0190473	10.588	9.945	-0.643	-284071	-285876	-1805.43	-284099	-285904	-1805.92	-0.576	-0.485	0.091	141.149	195.42	203.921	1.16658	9.815	2.4635	-553.272	-551.617	-1.655	-0.237	-0.369	0.132
barbiturate anion (in DMSO)	C-Nucleophile	DMSO	15.59	0.8	-487.024	-489.745	-2.721	-0.294	-0.192	0.102	0.188	0.028	-0.16	0.053	0.082	0.029	0.482	0.22	-0.262	-0.053	-0.082	-0.029	0.0029139	0.0152818	0.0123679	3.613	3.125	-0.488	-305554	-307266	-1711.49	-305578	-307290	-1712.01	-0.678	-0.571	0.107	127.078	148.088	145.07	1.10932	7.878	2.0022	-553.272	-551.617	-1.655	-0.237	-0.369	0.132
MeO-Breslow 1e	C-Nucleophile	THF	15.65	0.52	-1312.13	-1320.57	-8.436	-0.267	-0.172	0.095	0.098	-0.045	-0.143	0.0845	0.1085	0.024	0.365	0.127	-0.238	-0.0845	-0.1085	-0.024	0.00978116	0.0463474	0.0365663	3.177	3.96	0.783	-823065	-828377	-5311.73	-823118	-828431	-5313.3	0.209	0.163	-0.046	417.502	479.648	601.754	1.39177	16.12	3.98061	-232.511	-231.032	-1.479	-0.246	-0.404	0.158
(4-Me2N-C6H4)-(CO)-CH=SMe2 (in DMSO)	C-Nucleophile	DMSO	15.68	0.65	-991.238	-995.815	-4.577	-0.279	-0.193	0.086	0.109	-0.031	-0.14	0.085	0.112	0.027	0.388	0.162	-0.226	-0.085	-0.112	-0.027	0.00931057	0.038716	0.0294055	3.455	2.844	-0.611	-621823	-624706	-2883.1	-621862	-624746	-2884.35	-0.79	-0.702	0.088	223.334	298.783	344.906	1.25645	14.204	3.55384	-553.272	-551.617	-1.655	-0.237	-0.369	0.132
bis(phenylsulfonyl)methanide (in DMSO)	C-Nucleophile	DMSO	15.68	0.74	-1593.35	-1599.53	-6.182	-0.313	-0.2	0.113	0.106	-0.041	-0.147	0.1035	0.1205	0.017	0.419	0.159	-0.26	-0.1035	-0.1205	-0.017	0.0127831	0.0456612	0.032878	3.6	12.622	9.022	-999686	-1.00357e+06	-3888.99	-999725	-1.00361e+06	-3889.86	-1.189	-1.123	0.066	295.354	319.279	363.759	1.29584	14.008	3.3998	-553.272	-551.617	-1.655	-0.237	-0.369	0.132
Me2S=CH-CO2Et (in DMSO)	C-Nucleophile	DMSO	15.85	0.61	-781.512	-784.604	-3.092	-0.307	-0.208	0.099	0.15	0.001	-0.149	0.0785	0.1035	0.025	0.457	0.209	-0.248	-0.0785	-0.1035	-0.025	0.00674207	0.0256274	0.0188853	4.79	4.467	-0.323	-490283	-492230	-1947.05	-490314	-492262	-1948.14	-0.85	-0.765	0.085	148.223	219.175	232.7	1.19816	11.056	2.4982	-553.272	-551.617	-1.655	-0.237	-0.369	0.132
anion of ethyl 2-cyano-2-phenylacetate (in DMSO)	C-Nucleophile	DMSO	15.85	1.04	-626.82	-630.697	-3.877	-0.247	-0.171	0.076	0.143	0.002	-0.141	0.052	0.0845	0.0325	0.39	0.173	-0.217	-0.052	-0.0845	-0.0325	0.00346667	0.0206366	0.0171699	4.025	4.029	0.004	-393203	-395644	-2440.78	-393237	-395678	-2441.46	-0.551	-0.446	0.105	188.203	254.579	275.002	1.24505	13.263	2.973	-553.272	-551.617	-1.655	-0.237	-0.369	0.132
1-(N-pyrrolidino)cyclopentene	C-Nucleophile	Dichloromethane	15.91	0.86	-404.068	-406.83	-2.762	-0.282	-0.18	0.102	0.151	0.036	-0.115	0.0655	0.072	0.0065	0.433	0.216	-0.217	-0.0655	-0.072	-0.0065	0.0049541	0.012	0.0070459	2.067	2.434	0.367	-253399	-255141	-1742.09	-253427	-255170	-1742.78	-0.345	-0.342	0.003	137.222	218.195	245.937	1.14961	10.247	2.38387	-959.769	-958.05	-1.719	-0.317	-0.45	0.133
anion of 2-phenyl-2-(phenylsulfonyl)acetonitrile (in DMSO)	C-Nucleophile	DMSO	15.97	0.72	-1137.88	-1143.17	-5.29	-0.263	-0.182	0.081	0.102	-0.037	-0.139	0.0805	0.1095	0.029	0.365	0.145	-0.22	-0.0805	-0.1095	-0.029	0.00887705	0.0413457	0.0324686	13.844	12.471	-1.373	-713885	-717213	-3328.05	-713923	-717251	-3328.77	-0.735	-0.615	0.12	256.3	290.404	336.017	1.24266	11.307	2.95664	-553.272	-551.617	-1.655	-0.237	-0.369	0.132
anion of ethyl acetylacetate (in water)	C-Nucleophile	Water	15.99	0.62	-457.27	-460	-2.73	-0.278	-0.18	0.098	0.169	0.018	-0.151	0.0545	0.081	0.0265	0.447	0.198	-0.249	-0.0545	-0.081	-0.0265	0.00332243	0.0165682	0.0132458	8.764	8.35	-0.414	-286840	-288558	-1718.52	-286868	-288589	-1720.65	-0.691	-0.582	0.109	129.134	195.796	198.11	1.19158	10.689	2.5111	-76.455	-76.055	-0.4	-0.304	-0.505	0.201
anion of 1-phenylbutane-1,3-dione (in DMSO)	C-Nucleophile	DMSO	16.03	0.86	-533.87	-537.195	-3.325	-0.275	-0.18	0.095	0.12	-0.024	-0.144	0.0775	0.102	0.0245	0.395	0.156	-0.239	-0.0775	-0.102	-0.0245	0.00760285	0.0333462	0.0257433	12.763	11.703	-1.06	-334893	-336986	-2092.71	-334923	-337016	-2093.51	-0.646	-0.527	0.119	161.177	216.875	238.942	1.16485	10.412	2.5379	-553.272	-551.617	-1.655	-0.237	-0.369	0.132
anion of diethyl malonate (in water)	C-Nucleophile	Water	16.15	0.66	-571.21	-574.568	-3.358	-0.28	-0.186	0.094	0.169	0.021	-0.148	0.0555	0.0825	0.027	0.449	0.207	-0.242	-0.0555	-0.0825	-0.027	0.00343012	0.0164402	0.0130101	4.142	7.605	3.463	-358314	-360428	-2114.74	-358346	-360462	-2116	-0.726	-0.621	0.105	159.16	229.228	238.147	1.23394	11.837	2.7254	-76.455	-76.055	-0.4	-0.304	-0.505	0.201
Me2S=CH-CN (in DMSO)	C-Nucleophile	DMSO	16.23	0.6	-607.512	-609.597	-2.085	-0.302	-0.205	0.097	0.145	0.01	-0.135	0.0785	0.0975	0.019	0.447	0.215	-0.232	-0.0785	-0.0975	-0.019	0.0068929	0.0221076	0.0152147	11.976	11.366	-0.61	-381147	-382459	-1311.83	-381172	-382486	-1314.56	-0.89	-0.813	0.077	101.17	162.95	162.404	1.13217	8.612	1.92671	-553.272	-551.617	-1.655	-0.237	-0.369	0.132
cyanide (in MeCN)	C-Nucleophile	MeCN	16.27	0.7	-92.429	-92.975	-0.546	-0.386	-0.224	0.162	0.281	0.115	-0.166	0.0525	0.0545	0.002	0.667	0.339	-0.328	-0.0525	-0.0545	-0.002	0.00206615	0.0043809	0.00231475	0.411	0.63	0.219	-57994.4	-58337.6	-343.208	-58008.4	-58351.6	-343.227	-0.2	-0.263	-0.063	26.0174	58.7981	41.6786	1.0116	4.421	0.583667	-132.801	-131.97	-0.831	-0.341	-0.475	0.134
anion of dimedone (in DMSO)	C-Nucleophile	DMSO	16.27	0.77	-459.304	-462.189	-2.885	-0.276	-0.18	0.096	0.16	0.013	-0.147	0.058	0.0835	0.0255	0.436	0.193	-0.243	-0.058	-0.0835	-0.0255	0.0038578	0.0180628	0.014205	10.222	9.227	-0.995	-288095	-289913	-1817.81	-288122	-289941	-1818.39	-0.653	-0.543	0.11	139.172	192.602	216.27	1.10557	8.448	2.1535	-553.272	-551.617	-1.655	-0.237	-0.369	0.132
anion of 4-cyanobenzyl trifluoromethyl sulfone (in DMSO)	C-Nucleophile	DMSO	16.28	0.75	-1243.98	-1249.19	-5.211	-0.266	-0.189	0.077	0.099	-0.039	-0.138	0.0835	0.114	0.0305	0.365	0.15	-0.215	-0.0835	-0.114	-0.0305	0.00955103	0.04332	0.033769	4.217	4.047	-0.17	-780512	-783788	-3275.85	-780547	-783825	-3277.37	-0.867	-0.743	0.124	248.202	243.493	264.756	1.22136	12.654	3.16669	-553.272	-551.617	-1.655	-0.237	-0.369	0.132
anion of (4-nitrophenyl)nitromethane (in DMSO)	C-Nucleophile	DMSO	16.29	0.75	-676.371	-680.286	-3.915	-0.265	-0.187	0.078	0.054	-0.085	-0.139	0.1055	0.136	0.0305	0.319	0.102	-0.217	-0.1055	-0.136	-0.0305	0.0174455	0.0906667	0.0732211	8.881	5.28	-3.601	-424341	-426804	-2462.53	-424371	-426834	-2463.19	-0.225	-0.159	0.066	181.126	202.025	213.188	1.17081	11.62	2.99586	-553.272	-551.617	-1.655	-0.237	-0.369	0.132
1-(N-pyrrolidino)cyclohexene (in MeCN)	C-Nucleophile	MeCN	16.42	0.7	-443.115	-446.157	-3.042	-0.29	-0.179	0.111	0.15	0.034	-0.116	0.07	0.0725	0.0025	0.44	0.213	-0.227	-0.07	-0.0725	-0.0025	0.00556818	0.0123386	0.00677043	1.507	2.245	0.738	-277881	-279801	-1919.3	-277911	-279831	-1920.07	-0.315	-0.34	-0.025	151.249	233.135	269.895	1.15452	10.812	2.5362	-132.801	-131.97	-0.831	-0.341	-0.475	0.134
3-(tert-butyl)-1-methyl-1H-imidazol-3-ium-2-ide (in THF)	C-Nucleophile	THF	16.54	0.47	-420.051	-422.858	-2.807	-0.319	-0.219	0.1	0.158	0.029	-0.129	0.0805	0.095	0.0145	0.477	0.248	-0.229	-0.0805	-0.095	-0.0145	0.00679271	0.0181956	0.0114028	2.937	2.938	0.001	-263438	-265208	-1769.93	-263468	-265238	-1770.58	0.14	0.045	-0.095	138.21	218.547	243.235	1.15998	9.916	2.2584	-232.511	-231.032	-1.479	-0.246	-0.404	0.158
anion of 3-oxo-3-phenylpropanenitrile (in DMSO)	C-Nucleophile	DMSO	16.55	0.78	-473.834	-476.789	-2.955	-0.277	-0.182	0.095	0.11	-0.03	-0.14	0.0835	0.106	0.0225	0.387	0.152	-0.235	-0.0835	-0.106	-0.0225	0.00900807	0.0369605	0.0279525	15.098	14.34	-0.758	-297247	-299106	-1858.89	-297274	-299134	-1859.4	-0.706	-0.613	0.093	144.15	198.629	207.653	1.17149	11.534	2.6379	-553.272	-551.617	-1.655	-0.237	-0.369	0.132
MeO-Breslow 1c	C-Nucleophile	THF	16.61	0.68	-838.144	-843.555	-5.411	-0.24	-0.163	0.077	0.113	-0.029	-0.142	0.0635	0.096	0.0325	0.353	0.134	-0.219	-0.0635	-0.096	-0.0325	0.0057114	0.0343881	0.0286767	0.933	1.213	0.28	-525721	-529130	-3408.49	-525761	-529171	-3409.23	0.124	0.125	0.001	266.338	327.692	398.809	1.25087	13.925	3.2994	-232.511	-231.032	-1.479	-0.246	-0.404	0.158
anion of (4-cyanophenyl)nitromethane (in DMSO)	C-Nucleophile	DMSO	16.96	0.73	-564.599	-567.991	-3.392	-0.261	-0.18	0.081	0.082	-0.05	-0.132	0.0895	0.115	0.0255	0.343	0.13	-0.213	-0.0895	-0.115	-0.0255	0.0116767	0.0508654	0.0391886	8.223	5.733	-2.49	-354207	-356340	-2133.24	-354235	-356369	-2133.93	-0.211	-0.173	0.038	161.137	200.225	208.98	1.1759	12.084	2.8837	-553.272	-551.617	-1.655	-0.237	-0.369	0.132
3-acetyl-2-oxotetrahydro-2H-pyran-3-ide (in DMSO)	C-Nucleophile	DMSO	17	0.74	-495.142	-498.11	-2.968	-0.266	-0.172	0.094	0.169	0.022	-0.147	0.0485	0.075	0.0265	0.435	0.194	-0.241	-0.0485	-0.075	-0.0265	0.00270374	0.0144974	0.0117937	6.039	5.925	-0.114	-310599	-312468	-1869.05	-310626	-312496	-1869.81	-0.519	-0.393	0.126	141.144	188.325	202.677	1.12882	9.588	2.1679	-553.272	-551.617	-1.655	-0.237	-0.369	0.132
anion of 1-phenyl-2-(phenylsulfonyl)ethanone (in DMSO)	C-Nucleophile	DMSO	17.19	0.56	-1158.88	-1164.26	-5.375	-0.298	-0.199	0.099	0.107	-0.032	-0.139	0.0955	0.1155	0.02	0.405	0.167	-0.238	-0.0955	-0.1155	-0.02	0.0112596	0.0399409	0.0286813	13.112	12.028	-1.084	-727057	-730439	-3381.59	-727095	-730477	-3382.78	-0.888	-0.784	0.104	259.3	293.114	341.708	1.24029	12.361	3.0279	-553.272	-551.617	-1.655	-0.237	-0.369	0.132
methoxybis(phenylsulfonyl)methanide (in DMSO)	C-Nucleophile	DMSO	17.29	0.7	-1707.24	-1714.08	-6.838	-0.308	-0.2	0.108	0.098	-0.04	-0.138	0.105	0.12	0.015	0.406	0.16	-0.246	-0.105	-0.12	-0.015	0.0135776	0.045	0.0314224	9.037	8.498	-0.539	-1.07113e+06	-1.07543e+06	-4301.69	-1.07117e+06	-1.07548e+06	-4304.08	-0.583	-0.532	0.051	325.38	339.052	403.455	1.28428	14.243	3.2502	-553.272	-551.617	-1.655	-0.237	-0.369	0.132
anion of 4-(trifluoromethyl)benzyl trifluoromethyl sulfone (in DMSO)	C-Nucleophile	DMSO	17.33	0.74	-1487.93	-1494.06	-6.128	-0.268	-0.188	0.08	0.121	-0.022	-0.143	0.0735	0.105	0.0315	0.389	0.166	-0.223	-0.0735	-0.105	-0.0315	0.00694377	0.0332078	0.0262641	8.525	7.513	-1.012	-933588	-937440	-3852.02	-933627	-937481	-3853.43	-0.877	-0.761	0.116	291.19	253.242	278.113	1.22926	12.561	3.52775	-553.272	-551.617	-1.655	-0.237	-0.369	0.132
2-methoxy-2H-benzo[d][1,3]dithiol-2-ide 1,1,3,3-tetraoxide (in DMSO)	C-Nucleophile	DMSO	17.36	0.71	-1476.45	-1481.74	-5.287	-0.313	-0.188	0.125	0.09	-0.047	-0.137	0.1115	0.1175	0.006	0.403	0.141	-0.262	-0.1115	-0.1175	-0.006	0.0154246	0.0489583	0.0335337	9.422	8.541	-0.881	-926383	-929707	-3324.22	-926416	-929743	-3326.34	-0.052	-0.079	-0.027	247.268	248.509	276.026	1.21236	11.962	2.5937	-553.272	-551.617	-1.655	-0.237	-0.369	0.132
anion of 1,3-diphenylpropane-1,3-dione (in DMSO)	C-Nucleophile	DMSO	17.46	0.65	-724.419	-728.976	-4.557	-0.276	-0.183	0.093	0.104	-0.035	-0.139	0.086	0.109	0.023	0.38	0.148	-0.232	-0.086	-0.109	-0.023	0.00973158	0.0401385	0.0304069	14.092	12.803	-1.289	-454427	-457295	-2868.51	-454461	-457331	-2869.39	-0.633	-0.509	0.124	223.247	275.785	321.413	1.21558	10.397	2.8049	-553.272	-551.617	-1.655	-0.237	-0.369	0.132
1-ethoxy-2-methyl-1,3-dioxobutan-2-ide (in DMSO)	C-Nucleophile	DMSO	19.58	0.73	-496.305	-499.319	-3.014	-0.26	-0.167	0.093	0.163	0.025	-0.138	0.0485	0.071	0.0225	0.423	0.192	-0.231	-0.0485	-0.071	-0.0225	0.00278044	0.0131276	0.0103472	9.156	8.355	-0.801	-311314	-313213	-1898.48	-311346	-313245	-1899.68	-0.493	-0.369	0.124	143.16	211.249	225.146	1.18052	10.248	2.3859	-553.272	-551.617	-1.655	-0.237	-0.369	0.132
anion of 2-(4-NO2-C6H4)propionitrile (in DMSO)	C-Nucleophile	DMSO	19.61	0.6	-603.628	-607.309	-3.681	-0.23	-0.166	0.064	0.072	-0.067	-0.139	0.079	0.1165	0.0375	0.302	0.099	-0.203	-0.079	-0.1165	-0.0375	0.0103328	0.0685467	0.0582139	4.702	5.034	0.332	-378678	-380994	-2315.94	-378709	-381026	-2316.71	-0.487	-0.574	-0.087	175.164	218.768	235.728	1.18568	11.157	2.9214	-553.272	-551.617	-1.655	-0.237	-0.369	0.132
anion of ethyl cyanoacetate (in DMSO)	C-Nucleophile	DMSO	19.62	0.67	-397.208	-399.57	-2.362	-0.28	-0.18	0.1	0.17	0.041	-0.129	0.055	0.0695	0.0145	0.45	0.221	-0.229	-0.055	-0.0695	-0.0145	0.00336111	0.0109282	0.00756706	6.523	5.963	-0.56	-249176	-250663	-1486.92	-249203	-250691	-1487.35	-0.772	-0.687	0.085	112.107	166.449	165.18	1.14349	8.508	2.0966	-553.272	-551.617	-1.655	-0.237	-0.369	0.132
anion of 4-nitrobenzyl-CN (in DMSO)	C-Nucleophile	DMSO	19.67	0.68	-564.589	-567.987	-3.398	-0.237	-0.172	0.065	0.072	-0.069	-0.141	0.0825	0.1205	0.038	0.309	0.103	-0.206	-0.0825	-0.1205	-0.038	0.0110133	0.0704867	0.0594733	4.326	3.673	-0.653	-354201	-356338	-2137.01	-354229	-356367	-2137.64	-0.588	-0.484	0.104	161.137	199.348	208.949	1.17087	11.436	2.8253	-553.272	-551.617	-1.655	-0.237	-0.369	0.132
bis(4-nitrophenyl)methanide (in DMSO)	C-Nucleophile	DMSO	19.92	0.67	-905.941	-911.384	-5.443	-0.213	-0.166	0.047	0.04	-0.091	-0.131	0.0865	0.1285	0.042	0.253	0.075	-0.178	-0.0865	-0.1285	-0.042	0.0147871	0.110082	0.0952946	2.73	3.692	0.962	-568343	-571766	-3423.73	-568380	-571804	-3424.52	-0.432	-0.285	0.147	257.221	285.891	321.805	1.2591	15.543	4.228	-553.272	-551.617	-1.655	-0.237	-0.369	0.132
2-(4-NO2-C6H4)CH(-)CO2Et (in DMSO)	C-Nucleophile	DMSO	20	0.71	-738.577	-742.983	-4.406	-0.234	-0.17	0.064	0.071	-0.069	-0.14	0.0815	0.1195	0.038	0.305	0.101	-0.204	-0.0815	-0.1195	-0.038	0.0108889	0.0706943	0.0598054	5.421	6.338	0.917	-463329	-466102	-2772.49	-463364	-466138	-2773.58	-0.561	-0.435	0.126	208.191	257.673	280.783	1.24283	12.947	3.3502	-553.272	-551.617	-1.655	-0.237	-0.369	0.132
1-(ethoxycarbonyl)-2-oxocyclooctan-1-ide (in DMSO)	C-Nucleophile	DMSO	20.02	0.76	-651.286	-655.38	-4.094	-0.252	-0.161	0.091	0.159	0.015	-0.144	0.0465	0.073	0.0265	0.411	0.176	-0.235	-0.0465	-0.073	-0.0265	0.00263047	0.0151392	0.0125087	7.493	7.017	-0.476	-408502	-411082	-2580.36	-408536	-411117	-2581.4	-0.529	-0.394	0.135	197.251	260.608	307.874	1.18212	10.959	2.6386	-553.272	-551.617	-1.655	-0.237	-0.369	0.132
1-(isoquinolin-2-ium-2-yl)-2-oxo-2-phenylethan-1-ide (in DMSO)	C-Nucleophile	DMSO	20.08	0.57	-780.79	-785.796	-5.006	-0.271	-0.196	0.075	0.047	-0.082	-0.129	0.112	0.139	0.027	0.318	0.114	-0.204	-0.112	-0.139	-0.027	0.0197233	0.0847412	0.065018	10.088	7.954	-2.134	-489774	-492925	-3151.57	-489810	-492962	-3152.29	-0.305	-0.193	0.112	247.291	310.827	356.846	1.27778	16.032	3.8512	-553.272	-551.617	-1.655	-0.237	-0.369	0.132
anion of diethyl malonate (in DMSO)	C-Nucleophile	DMSO	20.22	0.65	-571.206	-574.573	-3.367	-0.277	-0.176	0.101	0.157	0.034	-0.123	0.06	0.071	0.011	0.434	0.21	-0.224	-0.06	-0.071	-0.011	0.00414747	0.0120024	0.00785492	10.462	9.411	-1.051	-358311	-360432	-2120.53	-358345	-360467	-2121.65	-0.721	-0.619	0.102	159.16	233.875	239.858	1.25296	10.169	2.5832	-553.272	-551.617	-1.655	-0.237	-0.369	0.132
3-(4-methoxyphenyl)-1-methyl-1H-imidazol-3-ium-2-ide (in THF)	C-Nucleophile	THF	20.41	0.46	-607.379	-611.22	-3.841	-0.303	-0.218	0.085	0.121	-0.02	-0.141	0.091	0.119	0.028	0.424	0.198	-0.226	-0.091	-0.119	-0.028	0.00976533	0.0357601	0.0259948	2.297	1.933	-0.364	-380986	-383405	-2419.2	-381019	-383439	-2420	0.158	0.062	-0.096	188.226	259.729	284.667	1.24132	13.708	3.1647	-232.511	-231.032	-1.479	-0.246	-0.404	0.158
2-ethoxy-1-fluoro-2-oxo-1-(phenylsulfonyl)ethan-1-ide (in DMSO)	C-Nucleophile	DMSO	20.51	0.64	-1181.14	-1186.31	-5.167	-0.303	-0.192	0.111	0.105	-0.033	-0.138	0.099	0.1125	0.0135	0.408	0.159	-0.249	-0.099	-0.1125	-0.0135	0.012011	0.0397995	0.0277885	12.999	11.703	-1.296	-741039	-744290	-3250.59	-741077	-744329	-3252.67	-0.284	-0.21	0.074	245.247	273.194	305.017	1.24694	10.964	2.7407	-553.272	-551.617	-1.655	-0.237	-0.369	0.132
1-(ethoxycarbonyl)-2-oxocyclododecan-1-ide (in DMSO)	C-Nucleophile	DMSO	20.6	0.63	-843.005	-848.369	-5.364	-0.24	-0.158	0.082	0.158	0.019	-0.139	0.041	0.0695	0.0285	0.398	0.177	-0.221	-0.041	-0.0695	-0.0285	0.00211181	0.0136448	0.011533	7.708	7.376	-0.332	-528754	-532134	-3380.02	-528793	-532174	-3380.99	-0.529	-0.403	0.126	261.336	321.178	393.344	1.23733	13.122	3.1566	-553.272	-551.617	-1.655	-0.237	-0.369	0.132
MeSO-CH-CO2Et (in DMSO)	C-Nucleophile	DMSO	20.61	0.64	-321.322	-323.243	-1.921	-0.268	-0.154	0.114	0.17	0.045	-0.125	0.049	0.0545	0.0055	0.438	0.199	-0.239	-0.049	-0.0545	-0.0055	0.00274087	0.00746294	0.00472207	8.277	6.931	-1.346	-201566	-201483	83.1493	-201590	-202800	-1209.78	-0.522	-0.602	-0.08	88.0852	138.445	133.121	1.09825	7.141	1.6259	-553.272	-551.617	-1.655	-0.237	-0.369	0.132
anion of 2-nitropropane (in DMSO)	C-Nucleophile	DMSO	20.61	0.69	-816.857	-820.04	-3.183	-0.285	-0.181	0.104	0.17	0.042	-0.128	0.0575	0.0695	0.012	0.455	0.223	-0.232	-0.0575	-0.0695	-0.012	0.00363324	0.0108302	0.00719692	7.936	7.473	-0.463	-512486	-514490	-2003.36	-512517	-514521	-2004.22	-0.883	-0.801	0.082	149.188	207.638	211.05	1.21145	11.664	2.5809	-553.272	-551.617	-1.655	-0.237	-0.369	0.132
1,3-diethoxy-2-fluoro-1,3-dioxopropan-2-ide (in DMSO)	C-Nucleophile	DMSO	20.63	0.76	-670.073	-673.827	-3.754	-0.276	-0.171	0.105	0.156	0.026	-0.13	0.06	0.0725	0.0125	0.432	0.197	-0.235	-0.06	-0.0725	-0.0125	0.00416667	0.0133407	0.00917407	11.452	10.207	-1.245	-420356	-422719	-2363.03	-420391	-422755	-2364.34	-0.044	0.033	0.077	177.15	236.697	242.811	1.25777	10.162	2.6122	-553.272	-551.617	-1.655	-0.237	-0.369	0.132
anion of nitromethane (in DMSO)	C-Nucleophile	DMSO	20.71	0.6	-243.231	-244.587	-1.356	-0.289	-0.172	0.117	0.196	0.033	-0.163	0.0465	0.0695	0.023	0.485	0.205	-0.28	-0.0465	-0.0695	-0.023	0.00222912	0.0117811	0.00955197	4.013	3.033	-0.98	-152602	-153455	-853.053	-152621	-153475	-853.4	-0.349	-0.422	-0.073	60.032	93.2466	77.067	1.0649	5.955	1.1751	-553.272	-551.617	-1.655	-0.237	-0.369	0.132
Me2S=CH(4-CN-C6H4) (in DMSO)	C-Nucleophile	DMSO	21.07	0.68	-837.099	-840.702	-3.603	-0.245	-0.179	0.066	0.107	-0.034	-0.141	0.069	0.1065	0.0375	0.352	0.145	-0.207	-0.069	-0.1065	-0.0375	0.00676278	0.0391112	0.0323484	17.152	17.068	-0.084	-525158	-527427	-2268.4	-525191	-527460	-2269.42	-0.735	-0.641	0.094	177.266	249.986	272.719	1.2294	12.811	3.0954	-553.272	-551.617	-1.655	-0.237	-0.369	0.132
3-mesityl-1-methyl-1H-imidazol-3-ium-2-ide (in THF)	C-Nucleophile	THF	21.5	0.45	-610.604	-614.644	-4.04	-0.326	-0.225	0.101	0.131	-0.014	-0.145	0.0975	0.1195	0.022	0.457	0.211	-0.246	-0.0975	-0.1195	-0.022	0.0104007	0.0338395	0.0234387	3.082	3.061	-0.021	-382976	-385522	-2546.12	-383012	-385560	-2547.67	0.16	0.062	-0.098	200.28	286.277	328.917	1.24256	12.688	2.9019	-232.511	-231.032	-1.479	-0.246	-0.404	0.158
anion of nitroethane (in DMSO)	C-Nucleophile	DMSO	21.54	0.62	-282.278	-283.916	-1.638	-0.278	-0.162	0.116	0.18	0.04	-0.14	0.049	0.061	0.012	0.458	0.202	-0.256	-0.049	-0.061	-0.012	0.00262118	0.0092104	0.00658922	6.807	5.606	-1.201	-177085	-178116	-1031.21	-177106	-178138	-1031.76	-0.531	-0.612	-0.081	74.0586	117.343	105.63	1.08606	7.133	1.4794	-553.272	-551.617	-1.655	-0.237	-0.369	0.132
3-(2,6-dimethoxyphenyl)-1-methyl-1H-imidazol-3-ium-2-ide (in THF)	C-Nucleophile	THF	23	0.46	-721.285	-725.767	-4.482	-0.316	-0.221	0.095	0.128	-0.016	-0.144	0.094	0.1185	0.0245	0.444	0.205	-0.239	-0.094	-0.1185	-0.0245	0.00995045	0.0342494	0.0242989	3.185	3.09	-0.095	-452440	-455263	-2823.21	-452477	-455301	-2824.56	0.167	0.07	-0.097	218.252	293.269	324.838	1.28354	11.637	2.8399	-232.511	-231.032	-1.479	-0.246	-0.404	0.158
anion of 1,2-diphenylethanone (in DMSO)	C-Nucleophile	DMSO	23.15	0.6	-611.649	-615.612	-3.963	-0.226	-0.153	0.073	0.113	-0.024	-0.137	0.0565	0.0885	0.032	0.339	0.129	-0.21	-0.0565	-0.0885	-0.032	0.00470833	0.0303576	0.0256492	5.548	5.298	-0.25	-383671	-386166	-2495.18	-383703	-386199	-2496.15	-0.54	-0.445	0.095	195.237	264.392	294.967	1.23402	14.031	3.3368	-553.272	-551.617	-1.655	-0.237	-0.369	0.132
2-(pyrid-4-yl)CH(-)CO2Et (in DMSO)	C-Nucleophile	DMSO	23.27	0.7	-551.041	-554.452	-3.411	-0.236	-0.159	0.077	0.143	0	-0.143	0.0465	0.0795	0.033	0.379	0.159	-0.22	-0.0465	-0.0795	-0.033	0.00285257	0.019875	0.0170224	5.128	4.644	-0.484	-345660	-347807	-2147.38	-345690	-347839	-2148.31	-0.615	-0.509	0.106	164.181	228.903	245.319	1.20805	11.8	2.771	-553.272	-551.617	-1.655	-0.237	-0.369	0.132
1,3-dimesityl-4,5-dihydro-1H-imidazol-3-ium-2-ide (in THF)	C-Nucleophile	THF	23.35	0.4	-919.456	-925.61	-6.154	-0.319	-0.219	0.1	0.13	-0.013	-0.143	0.0945	0.116	0.0215	0.449	0.206	-0.243	-0.0945	-0.116	-0.0215	0.0099446	0.0326602	0.0227156	3.48	3.568	0.088	-576673	-580551	-3878.48	-576723	-580603	-3879.42	0.278	0.171	-0.107	306.445	400.108	503.407	1.30764	16.758	3.946	-232.511	-231.032	-1.479	-0.246	-0.404	0.158
2-(4-CN-C6H4)CH(-)CO2Et (in DMSO)	C-Nucleophile	DMSO	23.64	0.65	-626.802	-630.684	-3.882	-0.228	-0.16	0.068	0.111	-0.026	-0.137	0.0585	0.093	0.0345	0.339	0.134	-0.205	-0.0585	-0.093	-0.0345	0.00504757	0.0322724	0.0272248	4.835	5.046	0.211	-393192	-395636	-2443.29	-393226	-395671	-2444.46	-0.6	-0.483	0.117	188.203	255.854	276.536	1.24666	12.801	3.2306	-553.272	-551.617	-1.655	-0.237	-0.369	0.132
sodium indenide (in DMSO)	C-Nucleophile	DMSO	23.74	0.71	-506.845	-509.597	-2.752	-0.212	-0.145	0.067	0.031	-0.012	-0.043	0.0905	0.0785	-0.012	0.243	0.133	-0.11	-0.0905	-0.0785	0.012	0.0168524	0.0231664	0.00631399	27.055	27.085	0.03	-317961	-319692	-1731.78	-317987	-319719	-1732.19	-0.404	-0.378	0.026	138.142	225.803	234.379	1.22849	12.741	2.8672	-553.272	-551.617	-1.655	-0.237	-0.369	0.132
bromo(phenylsulfonyl)methanide (in DMSO)	C-Nucleophile	DMSO	23.9	0.62	-3388.29	-3393.31	-5.016	-0.305	-0.191	0.114	0.096	-0.042	-0.138	0.1045	0.1165	0.012	0.401	0.149	-0.252	-0.1045	-0.1165	-0.012	0.0136163	0.0455445	0.0319282	10.883	9.907	-0.976	-2.1261e+06	-2.12926e+06	-3152.65	-2.12613e+06	-2.12929e+06	-3153.55	-0.883	-0.878	0.005	234.09	216.478	233.636	1.18026	11.265	2.7055	-553.272	-551.617	-1.655	-0.237	-0.369	0.132
anion of (4-CF3-C6H4)CH2SO2Ph (in DMSO)	C-Nucleophile	DMSO	24.3	0.51	-1381.82	-1388.03	-6.209	-0.247	-0.171	0.076	0.107	-0.031	-0.138	0.07	0.101	0.031	0.354	0.14	-0.214	-0.07	-0.101	-0.031	0.0069209	0.0364321	0.0295112	10.919	9.364	-1.555	-866955	-870861	-3905.55	-866996	-870903	-3906.56	-0.861	-0.739	0.122	299.288	305.802	351.309	1.27029	13.288	3.6922	-553.272	-551.617	-1.655	-0.237	-0.369	0.132
anion of 1-phenylpropan-2-one (in DMSO)	C-Nucleophile	DMSO	24.99	0.66	-421.086	-423.817	-2.731	-0.222	-0.145	0.077	0.145	0.008	-0.137	0.0385	0.0685	0.03	0.367	0.153	-0.214	-0.0385	-0.0685	-0.03	0.00201941	0.0153342	0.0133147	10.054	8.19	-1.864	-264128	-265848	-1719.68	-264155	-265876	-1720.11	-0.581	-0.481	0.1	133.167	198.107	212.468	1.15069	10.091	2.4769	-553.272	-551.617	-1.655	-0.237	-0.369	0.132
anion of 4-cyanobenzyl-CN (in DMSO)	C-Nucleophile	DMSO	25.11	0.54	-452.814	-455.688	-2.874	-0.228	-0.16	0.068	0.114	-0.023	-0.137	0.057	0.0915	0.0345	0.342	0.137	-0.205	-0.057	-0.0915	-0.0345	0.00475	0.0305557	0.0258057	4.944	4.302	-0.642	-284064	-285872	-1807.83	-284091	-285900	-1808.42	-0.635	-0.537	0.098	141.149	197.573	204.714	1.17639	11.681	2.7464	-553.272	-551.617	-1.655	-0.237	-0.369	0.132
anion of 2-(4-CN-C6H4)propionitrile (in DMSO)	C-Nucleophile	DMSO	25.35	0.56	-491.852	-495.009	-3.157	-0.221	-0.155	0.066	0.114	-0.023	-0.137	0.0535	0.089	0.0355	0.335	0.132	-0.203	-0.0535	-0.089	-0.0355	0.00427201	0.0300038	0.0257318	4.871	4.773	-0.098	-308541	-310528	-1986.76	-308571	-310558	-1987.48	-0.423	-0.318	0.105	155.176	217.007	231.509	1.19038	11.546	2.8242	-553.272	-551.617	-1.655	-0.237	-0.369	0.132
chloro((4-cyanophenyl)sulfonyl)methanide (in DMSO)	C-Nucleophile	DMSO	25.59	0.71	-1367.18	-1371.65	-4.47	-0.311	-0.193	0.118	0.061	-0.074	-0.135	0.125	0.1335	0.0085	0.372	0.119	-0.253	-0.125	-0.1335	-0.0085	0.0210013	0.0748834	0.0538821	10.021	9.055	-0.966	-857836	-860646	-2810.09	-857868	-860680	-2811.48	-0.822	-0.819	0.003	214.649	231.016	248.515	1.20873	12.803	3.0525	-553.272	-551.617	-1.655	-0.237	-0.369	0.132
anion of (benzylsulfonyl)benzene (in DMSO)	C-Nucleophile	DMSO	25.77	0.56	-1046.11	-1050.88	-4.779	-0.241	-0.163	0.078	0.112	-0.026	-0.138	0.0645	0.0945	0.03	0.353	0.137	-0.216	-0.0645	-0.0945	-0.03	0.00589271	0.0325922	0.0266994	11.552	9.98	-1.572	-656295	-659303	-3007.84	-656329	-659338	-3008.81	-0.882	-0.77	0.112	231.29	275.966	315.728	1.23094	11.316	2.9215	-553.272	-551.617	-1.655	-0.237	-0.369	0.132
cyano(pyridin-1-ium-1-yl)methanide (in DMSO)	C-Nucleophile	DMSO	25.94	0.42	-377.488	-379.901	-2.413	-0.264	-0.191	0.073	0.066	-0.065	-0.131	0.099	0.128	0.029	0.33	0.126	-0.204	-0.099	-0.128	-0.029	0.01485	0.0650159	0.0501659	11.549	8.937	-2.612	-236796	-238314	-1518.17	-236820	-238340	-1519.21	-0.43	-0.293	0.137	118.136	174.283	178.541	1.1368	9.753	2.203	-553.272	-551.617	-1.655	-0.237	-0.369	0.132
2-ethoxy-2-oxo-1-(pyridin-1-ium-1-yl)ethan-1-ide (in DMSO)	C-Nucleophile	DMSO	26.71	0.37	-551.489	-554.908	-3.419	-0.27	-0.192	0.078	0.069	-0.064	-0.133	0.1005	0.128	0.0275	0.339	0.128	-0.211	-0.1005	-0.128	-0.0275	0.0148971	0.064	0.0491029	7.963	5.434	-2.529	-345932	-348085	-2153.05	-345963	-348116	-2153.33	-0.381	-0.247	0.134	165.189	233.306	249.716	1.2168	12.531	2.86	-553.272	-551.617	-1.655	-0.237	-0.369	0.132
chloro((4-chlorophenyl)sulfonyl)methanide (in DMSO)	C-Nucleophile	DMSO	26.9	0.45	-1734.35	-1739.01	-4.658	-0.31	-0.192	0.118	0.09	-0.048	-0.138	0.11	0.12	0.01	0.4	0.144	-0.256	-0.11	-0.12	-0.01	0.015125	0.05	0.034875	14.154	13.459	-0.695	-1.08824e+06	-1.09117e+06	-2927.75	-1.08827e+06	-1.0912e+06	-2929.04	-0.819	-0.818	0.001	224.084	226.539	244.758	1.1974	12.196	3.0817	-553.272	-551.617	-1.655	-0.237	-0.369	0.132
1-((diphenylmethylene)amino)-2-ethoxy-2-oxoethan-1-ide (in DMSO)	C-Nucleophile	DMSO	26.95	0.52	-857.505	-862.961	-5.456	-0.226	-0.149	0.077	0.111	-0.029	-0.14	0.0575	0.089	0.0315	0.337	0.12	-0.217	-0.0575	-0.089	-0.0315	0.00490542	0.0330042	0.0280988	7.182	4.766	-2.416	-537889	-541325	-3435.84	-537929	-541366	-3437.07	-0.43	-0.291	0.139	266.314	339.677	397.049	1.30045	13.682	3.4158	-553.272	-551.617	-1.655	-0.237	-0.369	0.132
2-(diethylamino)-2-oxo-1-(pyridin-1-ium-1-yl)ethan-1-ide (in DMSO)	C-Nucleophile	DMSO	27.45	0.38	-609.724	-613.672	-3.948	-0.267	-0.182	0.085	0.072	-0.057	-0.129	0.0975	0.1195	0.022	0.339	0.125	-0.214	-0.0975	-0.1195	-0.022	0.014021	0.057121	0.0431	7.506	5.303	-2.203	-382428	-384916	-2487.67	-382463	-384952	-2488.49	-0.45	-0.234	0.216	192.257	272.697	309.551	1.23248	12.583	3.0288	-553.272	-551.617	-1.655	-0.237	-0.369	0.132
2-PhCH(-)CO2Et (in DMSO)	C-Nucleophile	DMSO	27.54	0.57	-535.03	-538.399	-3.369	-0.219	-0.145	0.074	0.152	0.012	-0.14	0.0335	0.0665	0.033	0.371	0.157	-0.214	-0.0335	-0.0665	-0.033	0.00151247	0.0140836	0.0125711	6.703	5.571	-1.132	-335605	-337727	-2121.72	-335636	-337759	-2122.59	-0.624	-0.525	0.099	163.193	235.815	254.378	1.21481	11.868	2.7844	-553.272	-551.617	-1.655	-0.237	-0.369	0.132
2-(3-Cl-C6H4)CH(-)CO2Et (in DMSO)	C-Nucleophile	DMSO	27.57	0.53	-993.958	-998.027	-4.069	-0.225	-0.151	0.074	0.141	0.002	-0.139	0.042	0.0745	0.0325	0.366	0.153	-0.213	-0.042	-0.0745	-0.0325	0.00240984	0.0181381	0.0157282	7.097	5.897	-1.2	-623592	-626153	-2560.73	-623625	-626187	-2561.75	-0.62	-0.516	0.104	197.638	251.386	272.996	1.23545	13.074	3.2186	-553.272	-551.617	-1.655	-0.237	-0.369	0.132
2-(4-Br-C6H4)CH(-)CO2Et (in DMSO)	C-Nucleophile	DMSO	27.62	0.53	-3106.82	-3111.95	-5.127	-0.222	-0.149	0.073	0.141	0.001	-0.14	0.0405	0.074	0.0335	0.363	0.15	-0.213	-0.0405	-0.074	-0.0335	0.0022593	0.0182533	0.015994	9.061	8.03	-1.031	-1.94943e+06	-1.95266e+06	-3224.98	-1.94947e+06	-1.95269e+06	-3226.08	-0.621	-0.518	0.103	242.089	257.129	280.343	1.2415	12.531	3.446	-553.272	-551.617	-1.655	-0.237	-0.369	0.132
2-(tert-butoxy)-1-((diphenylmethylene)amino)-2-oxoethan-1-ide (in DMSO)	C-Nucleophile	DMSO	27.77	0.47	-935.601	-941.62	-6.019	-0.219	-0.146	0.073	0.113	-0.027	-0.14	0.053	0.0865	0.0335	0.332	0.119	-0.213	-0.053	-0.0865	-0.0335	0.00423042	0.031438	0.0272076	3.992	3.818	-0.174	-586857	-590648	-3790.79	-586901	-590693	-3792.06	-0.397	-0.248	0.149	294.368	380.824	451.418	1.33843	15.394	3.72	-553.272	-551.617	-1.655	-0.237	-0.369	0.132
chloro(phenylsulfonyl)methanide (in DMSO)	C-Nucleophile	DMSO	28.27	0.42	-1275.43	-1279.39	-3.958	-0.308	-0.19	0.118	0.099	-0.039	-0.138	0.1045	0.1145	0.01	0.407	0.151	-0.256	-0.1045	-0.1145	-0.01	0.0134155	0.0434114	0.0299959	13.277	12.398	-0.879	-800259	-802748	-2488.61	-800289	-802778	-2489.83	-0.818	-0.818	0	189.639	210.962	226.339	1.17477	11.016	2.5544	-553.272	-551.617	-1.655	-0.237	-0.369	0.132
anion of 2-phenyl-propionitrile (in DMSO)	C-Nucleophile	DMSO	28.95	0.58	-400.079	-402.724	-2.645	-0.207	-0.137	0.07	0.149	0.01	-0.139	0.029	0.0635	0.0345	0.356	0.147	-0.209	-0.029	-0.0635	-0.0345	0.00118118	0.0137151	0.012534	8.319	7.588	-0.731	-250953	-252619	-1665.35	-250980	-252646	-1665.91	-0.47	-0.564	-0.094	130.167	196.91	209.283	1.15531	9.729	2.347	-553.272	-551.617	-1.655	-0.237	-0.369	0.132
1-((4-chlorobenzylidene)amino)-2-ethoxy-2-oxoethan-1-ide (in DMSO)	C-Nucleophile	DMSO	29.02	0.49	-1086.85	-1091.49	-4.642	-0.221	-0.152	0.069	0.101	-0.033	-0.134	0.06	0.0925	0.0325	0.322	0.119	-0.203	-0.06	-0.0925	-0.0325	0.00559006	0.0359506	0.0303606	14.622	11.086	-3.536	-681869	-684790	-2920.24	-681904	-684827	-2923.35	-0.384	-0.248	0.136	224.663	280.638	308.622	1.27092	13.701	3.7435	-553.272	-551.617	-1.655	-0.237	-0.369	0.132
1-(benzylideneamino)-2-ethoxy-2-oxoethan-1-ide (in DMSO)	C-Nucleophile	DMSO	29.1	0.5	-627.939	-631.869	-3.93	-0.217	-0.152	0.065	0.11	-0.03	-0.14	0.0535	0.091	0.0375	0.327	0.122	-0.205	-0.0535	-0.091	-0.0375	0.00437653	0.0339385	0.029562	9.428	10.4	0.972	-393891	-396365	-2474.43	-393926	-396401	-2475.13	-0.382	-0.259	0.123	190.218	268.437	290.931	1.26446	12.6	3.2658	-553.272	-551.617	-1.655	-0.237	-0.369	0.132
cyano((diphenylmethylene)amino)methanide	C-Nucleophile	DMSO	29.5	0.5	-453.942	-456.876	-2.934	-0.216	-0.148	0.068	0.112	-0.024	-0.136	0.052	0.086	0.034	0.328	0.124	-0.204	-0.052	-0.086	-0.034	0.00412195	0.0298226	0.0257006	12.615	10.17	-2.445	-284757	-286603	-1846.42	-284785	-286631	-1846.95	-0.058	-0.082	-0.024	143.165	209.822	218.09	1.1977	11.745	2.829	-553.272	-551.617	-1.655	-0.237	-0.369	0.132
2-(benzylideneamino)-1-ethoxy-1-oxopropan-2-ide (in DMSO)	C-Nucleophile	DMSO	30.82	0.41	-666.981	-671.204	-4.223	-0.209	-0.144	0.065	0.113	-0.022	-0.135	0.048	0.083	0.035	0.322	0.122	-0.2	-0.048	-0.083	-0.035	0.00357764	0.0282336	0.024656	7.762	4.914	-2.848	-418371	-421031	-2659.71	-418407	-421068	-2660.83	-0.162	-0.098	0.064	204.245	292.92	317.898	1.30061	13.229	3.3772	-553.272	-551.617	-1.655	-0.237	-0.369	0.132
Tri-p-tolylmethane	H-Nucleophile	MeCN	-8.8	0.82	-846.119	-851.826	-5.707	-0.305	-0.232	0.073	0.113	-0.022	-0.135	0.096	0.127	0.031	0.418	0.21	-0.208	-0.096	-0.127	-0.031	0.0110239	0.0384024	0.0273785	0.099	0.056	-0.043	-530689	-534283	-3594.34	-530728	-534330	-3601.73	0.199	0.225	0.026	286.41	390.391	467.739	1.33995	13.994	3.6842	-132.801	-131.97	-0.831	-0.341	-0.475	0.134
Bis(4-methoxyphenyl)phenylmethane	H-Nucleophile	MeCN	-7	0.82	-1070.72	-1077.51	-6.792	-0.295	-0.215	0.08	0.11	-0.025	-0.135	0.0925	0.12	0.0275	0.405	0.19	-0.215	-0.0925	-0.12	-0.0275	0.0105633	0.0378947	0.0273315	4.153	3.795	-0.358	-671611	-675890	-4278.3	-671660	-675940	-4280.04	0.194	0.223	0.029	334.408	419.817	500.291	1.37774	15.332	4.1654	-132.801	-131.97	-0.831	-0.341	-0.475	0.134
Tetraethylsilane	H-Nucleophile	MeCN	-6.5	1.1	-603.636	-606.547	-2.911	-0.392	-0.272	0.12	0.145	0.031	-0.114	0.1235	0.1205	-0.003	0.537	0.303	-0.234	-0.1235	-0.1205	0.003	0.0142014	0.0239608	0.00975946	0.056	0.079	0.023	-378604	-380440	-1836.22	-378639	-380476	-1836.97	0.186	0.212	0.026	144.33	243.294	294.467	1.13683	9.052	2.3159	-132.801	-131.97	-0.831	-0.341	-0.475	0.134
(2,2-Diphenylethyl)diethyl(methyl)silane	H-Nucleophile	Dichloromethane	-6.4	1.1	-1023.78	-1029.43	-5.655	-0.319	-0.243	0.076	0.118	-0.023	-0.141	0.1005	0.133	0.0325	0.437	0.22	-0.217	-0.1005	-0.133	-0.0325	0.0115564	0.0402023	0.0286459	0.367	0.36	-0.007	-642154	-645717	-3563.58	-642200	-645765	-3564.91	0.18	0.21	0.03	282.495	377.169	483.108	1.26696	13.236	3.4479	-959.769	-958.05	-1.719	-0.317	-0.45	0.133
Butyltrimethylsilane	H-Nucleophile	Dichloromethane	-5.4	1.1	-564.61	-567.24	-2.63	-0.395	-0.276	0.119	0.141	0.031	-0.11	0.127	0.1225	-0.0045	0.536	0.307	-0.229	-0.127	-0.1225	0.0045	0.0150457	0.0244401	0.00939444	0.097	0.078	-0.019	-354136	-355794	-1658.39	-354169	-355828	-1659.31	0.156	0.211	0.055	130.303	238.807	270.969	1.17948	11.18	2.5477	-959.769	-958.05	-1.719	-0.317	-0.45	0.133
1,3-Bis(trimethylsilyl)propane	H-Nucleophile	Dichloromethane	-5.3	1.1	-932.835	-936.65	-3.815	-0.379	-0.263	0.116	0.136	0.026	-0.11	0.1215	0.1185	-0.003	0.515	0.289	-0.226	-0.1215	-0.1185	0.003	0.0143323	0.0242946	0.00996227	0.096	0.079	-0.017	-585149	-587553	-2404.05	-585191	-587596	-2405.03	0.157	0.185	0.028	188.458	313.926	374.736	1.24911	13.05	3.2765	-959.769	-958.05	-1.719	-0.317	-0.45	0.133
Tris(4-methoxyphenyl)methane	H-Nucleophile	MeCN	-5.18	0.82	-1070.71	-1077.51	-6.795	-0.298	-0.215	0.083	0.11	-0.025	-0.135	0.094	0.12	0.026	0.408	0.19	-0.218	-0.094	-0.12	-0.026	0.0108284	0.0378947	0.0270663	4.697	3.779	-0.918	-671610	-675890	-4279.46	-671659	-675940	-4280.89	0.195	0.223	0.028	334.408	419.809	500.301	1.3777	15.317	4.165	-132.801	-131.97	-0.831	-0.341	-0.475	0.134
Diethylether	H-Nucleophile	Dichloromethane	-5.1	0.8	-232.21	-233.734	-1.524	-0.417	-0.259	0.158	0.161	0.047	-0.114	0.128	0.106	-0.022	0.578	0.306	-0.272	-0.128	-0.106	0.022	0.014173	0.0183595	0.00418647	1.61	1.461	-0.149	-145619	-146580	-961.874	-145642	-146604	-962.128	0.124	0.152	0.028	74.1216	156.346	152.164	1.13449	9.031	1.8338	-959.769	-958.05	-1.719	-0.317	-0.45	0.133
Dimethoxymethane	H-Nucleophile	Dichloromethane	-4.9	0.8	-268.029	-269.631	-1.602	-0.425	-0.266	0.159	0.159	0.046	-0.113	0.133	0.11	-0.023	0.584	0.312	-0.272	-0.133	-0.11	0.023	0.0151447	0.019391	0.00424633	2.54	2.337	-0.203	-168111	-169121	-1010.29	-168134	-169145	-1010.57	0.117	0.148	0.031	76.0944	141.756	135.042	1.11383	8.167	1.6575	-959.769	-958.05	-1.719	-0.317	-0.45	0.133
Trimethyl(3-(trimethylgermyl)propyl)silane	H-Nucleophile	MeCN	-4.8	1.1	-2719.2	-2724.12	-4.923	-0.369	-0.258	0.111	0.135	0.026	-0.109	0.117	0.116	-0.001	0.504	0.284	-0.22	-0.117	-0.116	0.001	0.0135804	0.0236901	0.0101098	0.127	0.123	-0.004	-1.70611e+06	-1.70921e+06	-3099.73	-1.70615e+06	-1.70925e+06	-3100.91	0.158	0.186	0.028	233.012	319.184	379.905	1.25848	13.175	3.20211	-132.801	-131.97	-0.831	-0.341	-0.475	0.134
1,6-Bis(trimethylsilyl)hexane	H-Nucleophile	Dichloromethane	-4.7	1.1	-1049.97	-1054.62	-4.655	-0.383	-0.267	0.116	0.14	0.031	-0.109	0.1215	0.118	-0.0035	0.523	0.298	-0.225	-0.1215	-0.118	0.0035	0.014113	0.0233624	0.00924937	0	0	0	-658592	-661527	-2934.88	-658640	-661576	-2936.01	0.154	0.182	0.028	230.538	380.848	458.505	1.32468	16.903	4.5825	-959.769	-958.05	-1.719	-0.317	-0.45	0.133
Tetraethylgermane	H-Nucleophile	MeCN	-4.7	1.1	-2390	-2394.02	-4.021	-0.377	-0.263	0.114	0.138	0.026	-0.112	0.1195	0.1185	-0.001	0.515	0.289	-0.226	-0.1195	-0.1185	0.001	0.0138643	0.0242946	0.0104302	0	0	0	-1.49957e+06	-1.5021e+06	-2532.32	-1.4996e+06	-1.50214e+06	-2534.61	0.182	0.206	0.024	188.884	248.374	300.948	1.14385	10.004	2.0756	-132.801	-131.97	-0.831	-0.341	-0.475	0.134
Triphenylmethane	H-Nucleophile	Dichloromethane	-4.27	0.8	-728.982	-733.843	-4.861	-0.317	-0.241	0.076	0.113	-0.024	-0.137	0.102	0.1325	0.0305	0.43	0.217	-0.213	-0.102	-0.1325	-0.0305	0.0120977	0.0404522	0.0283545	0.118	0.152	0.034	-457240	-460302	-3061.38	-457277	-460340	-3062.63	0.197	0.226	0.029	244.33	323.051	383.514	1.26573	11.746	3.154	-959.769	-958.05	-1.719	-0.317	-0.45	0.133
Bis(4-(dimethylamino)phenyl)phenylmethane	H-Nucleophile	MeCN	-4.2	0.82	-995.206	-1001.85	-6.643	-0.276	-0.191	0.085	0.114	-0.02	-0.134	0.081	0.1055	0.0245	0.39	0.171	-0.219	-0.081	-0.1055	-0.0245	0.00841154	0.0325446	0.0241331	1.221	2.516	1.295	-624196	-628382	-4186.36	-624245	-628433	-4187.85	0.193	0.221	0.028	330.466	431.804	527.276	1.36831	15.807	4.1315	-132.801	-131.97	-0.831	-0.341	-0.475	0.134
Allylbenzene	H-Nucleophile	Dichloromethane	-4.12	0.97	-346.699	-349.05	-2.351	-0.33	-0.25	0.08	0.128	-0.017	-0.145	0.101	0.1335	0.0325	0.458	0.233	-0.225	-0.101	-0.1335	-0.0325	0.0111365	0.0382452	0.0271087	0.248	0.245	-0.003	-217444	-218926	-1481.99	-217470	-218953	-1482.62	0.184	0.213	0.029	118.176	198.744	210.56	1.16136	10.195	2.2932	-959.769	-958.05	-1.719	-0.317	-0.45	0.133
2-Isopropyl-4,5-dimethyl-1,3-dioxolane (ani)	H-Nucleophile	Dichloromethane	-4.1	0.8	-462.11	-465.069	-2.959	-0.407	-0.259	0.148	0.159	0.046	-0.113	0.124	0.1065	-0.0175	0.566	0.305	-0.261	-0.124	-0.1065	0.0175	0.013583	0.0185939	0.00501081	1.802	1.751	-0.051	-289815	-291682	-1866.83	-289846	-291714	-1867.53	0.105	0.137	0.032	144.211	228.349	253.692	1.17847	10.13	2.3138	-959.769	-958.05	-1.719	-0.317	-0.45	0.133
1,1-Dimethylsilolane	H-Nucleophile	Dichloromethane	-3.86	1.1	-524.39	-526.696	-2.306	-0.39	-0.271	0.119	0.143	0.034	-0.109	0.1235	0.1185	-0.005	0.533	0.305	-0.228	-0.1235	-0.1185	0.005	0.0143079	0.0230201	0.00871216	0.27	0.26	-0.01	-328931	-330384	-1453.6	-328957	-330412	-1454.24	0.194	0.218	0.024	114.261	197.942	222.391	1.11528	8.296	1.899	-959.769	-958.05	-1.719	-0.317	-0.45	0.133
1,3-Dioxepane	H-Nucleophile	Dichloromethane	-3.8	0.8	-344.96	-347.079	-2.119	-0.41	-0.257	0.153	0.163	0.049	-0.114	0.1235	0.104	-0.0195	0.573	0.306	-0.267	-0.1235	-0.104	0.0195	0.0133091	0.0176732	0.00436408	1.266	1.25	-0.016	-216360	-217696	-1336.28	-216382	-217719	-1336.72	0.115	0.147	0.032	102.132	158.305	167.617	1.07698	7.515	1.6661	-959.769	-958.05	-1.719	-0.317	-0.45	0.133
Tetrahydrofuran	H-Nucleophile	Dichloromethane	-3.5	0.8	-231.038	-232.517	-1.479	-0.407	-0.249	0.158	0.155	0.041	-0.114	0.126	0.104	-0.022	0.562	0.29	-0.272	-0.126	-0.104	0.022	0.0141246	0.0186483	0.00452372	2.287	2.2	-0.087	-144897	-145830	-932.917	-144918	-145851	-933.267	0.144	0.173	0.029	72.1057	133.149	131.495	1.06493	6.588	1.3711	-959.769	-958.05	-1.719	-0.317	-0.45	0.133
2-Isopropyl-4,5-dimethyl-1,3-dioxolane (syn)	H-Nucleophile	Dichloromethane	-3.5	0.8	-462.107	-465.067	-2.96	-0.408	-0.26	0.148	0.156	0.043	-0.113	0.126	0.1085	-0.0175	0.564	0.303	-0.261	-0.126	-0.1085	0.0175	0.0140745	0.0194262	0.00535169	1.755	1.689	-0.066	-289814	-291681	-1867.11	-289844	-291712	-1867.92	0.105	0.136	0.031	144.211	225.366	252.844	1.16567	10.102	2.272	-959.769	-958.05	-1.719	-0.317	-0.45	0.133
Trimethyl(phenethyl)silane	H-Nucleophile	Dichloromethane	-3.5	1.1	-716.117	-719.697	-3.58	-0.325	-0.245	0.08	0.131	-0.011	-0.142	0.097	0.128	0.031	0.456	0.234	-0.222	-0.097	-0.128	-0.031	0.0103169	0.0350085	0.0246917	0.522	0.583	0.061	-449190	-451446	-2256.14	-449226	-451483	-2257.14	0.172	0.2	0.028	178.346	280.927	325.673	1.22742	12.486	3.1354	-959.769	-958.05	-1.719	-0.317	-0.45	0.133
2-Methyl-1,3-dioxolane	H-Nucleophile	Dichloromethane	-3.3	0.8	-305.922	-307.758	-1.836	-0.42	-0.264	0.156	0.161	0.047	-0.114	0.1295	0.1085	-0.021	0.581	0.311	-0.27	-0.1295	-0.1085	0.021	0.0144322	0.0189264	0.00449422	1.732	1.605	-0.127	-191883	-193042	-1158.15	-191906	-193065	-1158.58	0.105	0.136	0.031	88.105	145.976	143.904	1.0994	7.602	1.5457	-959.769	-958.05	-1.719	-0.317	-0.45	0.133
Tris(4-(dimethylamino)phenyl)methane	H-Nucleophile	MeCN	-3.3	0.82	-1128.32	-1135.85	-7.535	-0.283	-0.186	0.097	0.114	-0.017	-0.131	0.0845	0.1015	0.017	0.397	0.169	-0.228	-0.0845	-0.1015	-0.017	0.00899276	0.03048	0.0214873	1.542	1.696	0.154	-707673	-712422	-4748.56	-707728	-712479	-4751.41	0.194	0.217	0.023	373.534	486.01	599.248	1.41415	15.79	4.4905	-132.801	-131.97	-0.831	-0.341	-0.475	0.134
1,2-Dihydronaphthalene	H-Nucleophile	MeCN	-3.3	1	-384.59	-387.18	-2.59	-0.299	-0.223	0.076	0.105	-0.038	-0.143	0.097	0.1305	0.0335	0.404	0.185	-0.219	-0.097	-0.1305	-0.0335	0.0116448	0.0460277	0.0343829	0.874	0.889	0.015	-241216	-242848	-1632.04	-241240	-242873	-1632.6	0.193	0.21	0.017	130.186	197.182	216.139	1.13232	9.613	2.1412	-132.801	-131.97	-0.831	-0.341	-0.475	0.134
Dichloro(methyl)silane	H-Nucleophile	Dichloromethane	-3.2	0.73	-1248.28	-1250.61	-2.331	-0.447	-0.32	0.127	0.14	-0.002	-0.142	0.1535	0.161	0.0075	0.587	0.318	-0.269	-0.1535	-0.161	-0.0075	0.0200701	0.0407563	0.0206862	3.493	3.379	-0.114	-783271	-784736	-1464.62	-783295	-784760	-1464.9	-0.212	-0.16	0.052	115.034	143.221	140.524	1.09588	7.143	1.6775	-959.769	-958.05	-1.719	-0.317	-0.45	0.133
3-Methyl-1,4-pentadiene	H-Nucleophile	Dichloromethane	-3.08	0.97	-233.041	-234.679	-1.638	-0.363	-0.264	0.099	0.151	-0.003	-0.154	0.106	0.1335	0.0275	0.514	0.261	-0.253	-0.106	-0.1335	-0.0275	0.01093	0.0341422	0.0232123	0.423	0.447	0.024	-146136	-147170	-1033.37	-146160	-147194	-1033.72	0.186	0.219	0.033	82.1436	163.801	169.128	1.10771	8.584	1.833	-959.769	-958.05	-1.719	-0.317	-0.45	0.133
2,4,5-Trimethyl-1,3-dioxolane (anti)	H-Nucleophile	Dichloromethane	-3	0.8	-384.022	-386.42	-2.398	-0.413	-0.261	0.152	0.16	0.046	-0.114	0.1265	0.1075	-0.019	0.573	0.307	-0.266	-0.1265	-0.1075	0.019	0.0139636	0.0188213	0.00485769	1.776	1.714	-0.062	-240854	-242366	-1512.48	-240880	-242393	-1513.08	0.106	0.137	0.031	116.158	188.291	199.314	1.14129	8.829	1.9301	-959.769	-958.05	-1.719	-0.317	-0.45	0.133
1,4-Pentadiene	H-Nucleophile	Dichloromethane	-2.99	0.97	-193.999	-195.356	-1.357	-0.362	-0.264	0.098	0.15	-0.004	-0.154	0.106	0.134	0.028	0.512	0.26	-0.252	-0.106	-0.134	-0.028	0.0109727	0.0345308	0.0235581	0.377	0.396	0.019	-121657	-122513	-855.722	-121679	-122536	-856.82	0.187	0.215	0.028	68.117	149.358	144.297	1.12283	8.582	1.8046	-959.769	-958.05	-1.719	-0.317	-0.45	0.133
2-Ethyl-4,5-dimethyl-1,3-dioxolane (anti)	H-Nucleophile	Dichloromethane	-2.9	0.8	-423.066	-425.744	-2.678	-0.41	-0.259	0.151	0.16	0.046	-0.114	0.125	0.1065	-0.0185	0.57	0.305	-0.265	-0.125	-0.1065	0.0185	0.0137061	0.0185939	0.00488771	1.724	1.67	-0.054	-265334	-267024	-1689.49	-265363	-267053	-1690.26	0.105	0.136	0.031	130.185	210.156	227.215	1.16727	10.095	2.1817	-959.769	-958.05	-1.719	-0.317	-0.45	0.133
1,3-Dioxolane	H-Nucleophile	Dichloromethane	-2.86	0.8	-266.867	-268.423	-1.556	-0.417	-0.259	0.158	0.159	0.047	-0.112	0.129	0.106	-0.023	0.576	0.306	-0.27	-0.129	-0.106	0.023	0.0144453	0.0183595	0.00391416	1.59	1.468	-0.122	-167396	-168377	-980.658	-167416	-168396	-980.815	0.113	0.143	0.03	74.0785	122.461	115.685	1.06677	6.327	1.30078	-959.769	-958.05	-1.719	-0.317	-0.45	0.133
p-Cymene	H-Nucleophile	Dichloromethane	-2.8	0.97	-386.935	-389.609	-2.674	-0.317	-0.238	0.079	0.131	-0.01	-0.141	0.093	0.124	0.031	0.448	0.228	-0.22	-0.093	-0.124	-0.031	0.0096529	0.0337193	0.0240664	0.028	0.119	0.091	-242658	-244345	-1686.68	-242688	-244373	-1685.5	0.167	0.203	0.036	134.218	220.96	246.319	1.16298	10.749	2.454	-959.769	-958.05	-1.719	-0.317	-0.45	0.133
Isopropanol	H-Nucleophile	Water	-2.6	0.8	-193.18	-194.423	-1.243	-0.435	-0.274	0.161	0.155	0.038	-0.117	0.14	0.118	-0.022	0.59	0.312	-0.278	-0.14	-0.118	0.022	0.0166102	0.0223141	0.00570393	2.12	2.01	-0.11	-121147	-121931	-784.364	-121168	-121952	-784.635	0.127	0.157	0.03	60.095	127.161	121.676	1.07104	6.714	1.3786	-76.455	-76.055	-0.4	-0.304	-0.505	0.201
4,5-Dimethyl-2-vinyl-1,3-dioxolane	H-Nucleophile	Dichloromethane	-2.6	0.8	-421.87	-424.505	-2.635	-0.383	-0.262	0.121	0.159	-0.008	-0.167	0.112	0.135	0.023	0.542	0.254	-0.288	-0.112	-0.135	-0.023	0.011572	0.035876	0.024304	1.812	1.69	-0.122	-264600	-266261	-1660.92	-264628	-266290	-1661.61	0.116	0.147	0.031	128.169	203.381	215.843	1.16898	10.084	2.1746	-959.769	-958.05	-1.719	-0.317	-0.45	0.133
2,4,5-Trimethyl-1,3-dioxolane (syn)	H-Nucleophile	Dichloromethane	-2.5	0.8	-384.019	-386.418	-2.399	-0.414	-0.262	0.152	0.158	0.044	-0.114	0.128	0.109	-0.019	0.572	0.306	-0.266	-0.128	-0.109	0.019	0.0143217	0.0194134	0.00509172	1.72	1.633	-0.087	-240852	-242365	-1512.82	-240878	-242392	-1513.54	0.105	0.136	0.031	116.158	185.467	198.454	1.12741	8.843	1.8853	-959.769	-958.05	-1.719	-0.317	-0.45	0.133
1,4-dihydronaphthalene	H-Nucleophile	MeCN	-2.5	1	-384.586	-387.175	-2.589	-0.322	-0.237	0.085	0.125	-0.016	-0.141	0.0985	0.1265	0.028	0.447	0.221	-0.226	-0.0985	-0.1265	-0.028	0.0108526	0.0362042	0.0253516	0.374	0.371	-0.003	-241213	-242845	-1631.23	-241238	-242870	-1632.07	0.188	0.217	0.029	130.186	197.5	216.441	1.13309	9.674	2.1539	-132.801	-131.97	-0.831	-0.341	-0.475	0.134
4,5-Dimethyl-1,3-dioxolane (anti)	H-Nucleophile	Dichloromethane	-2.4	0.8	-344.966	-347.083	-2.117	-0.41	-0.255	0.155	0.156	0.043	-0.113	0.127	0.106	-0.021	0.566	0.298	-0.268	-0.127	-0.106	0.021	0.0142482	0.0188523	0.00460412	1.654	1.55	-0.104	-216365	-217700	-1335.01	-216388	-217724	-1335.5	0.113	0.142	0.029	102.132	163.33	170.663	1.0979	8.003	1.6741	-959.769	-958.05	-1.719	-0.317	-0.45	0.133
2-Ethyl-4,5-dimethyl-1,3-dioxolane (syn)	H-Nucleophile	Dichloromethane	-2.4	0.8	-423.06	-425.742	-2.682	-0.416	-0.261	0.155	0.156	0.043	-0.113	0.13	0.109	-0.021	0.572	0.304	-0.268	-0.13	-0.109	0.021	0.0147727	0.0195411	0.00476839	1.839	1.613	-0.226	-265332	-267022	-1690.29	-265359	-267051	-1692.47	0.111	0.135	0.024	130.185	207.28	226.338	1.15427	9.725	2.1353	-959.769	-958.05	-1.719	-0.317	-0.45	0.133
1,1-Dimethylsilinane	H-Nucleophile	Dichloromethane	-2.4	1.1	-563.439	-566.025	-2.586	-0.382	-0.263	0.119	0.142	0.032	-0.11	0.12	0.1155	-0.0045	0.524	0.295	-0.229	-0.12	-0.1155	0.0045	0.0137405	0.0226106	0.00887014	0.053	0.047	-0.006	-353414	-355045	-1630.22	-353443	-355074	-1630.99	0.192	0.217	0.025	128.287	211.415	246.918	1.11094	8.952	2.03566	-959.769	-958.05	-1.719	-0.317	-0.45	0.133
Bis(4-methoxyphenyl)methane	H-Nucleophile	Dichloromethane	-2.11	0.98	-727.214	-731.852	-4.638	-0.303	-0.221	0.082	0.12	-0.017	-0.137	0.0915	0.119	0.0275	0.423	0.204	-0.219	-0.0915	-0.119	-0.0275	0.00989628	0.0347083	0.0248121	2.331	2.341	0.01	-456143	-459063	-2920.46	-456177	-459100	-2923.07	0.19	0.214	0.024	228.286	310.849	354.133	1.28438	14.754	3.643	-959.769	-958.05	-1.719	-0.317	-0.45	0.133
1,1-Dimethylsiletane	H-Nucleophile	Dichloromethane	-2.1	1.1	-485.318	-487.346	-2.028	-0.378	-0.263	0.115	0.143	0.035	-0.108	0.1175	0.114	-0.0035	0.521	0.298	-0.223	-0.1175	-0.114	0.0035	0.0132498	0.0218054	0.00855561	0.723	0.632	-0.091	-304433	-305711	-1277.53	-304458	-305737	-1279.16	0.19	0.212	0.022	100.234	182.807	197.745	1.1139	7.855	1.7554	-959.769	-958.05	-1.719	-0.317	-0.45	0.133
Triethoxysilane	H-Nucleophile	Dichloromethane	-1.8	0.75	-750.305	-753.724	-3.419	-0.44	-0.283	0.157	0.152	0.039	-0.113	0.144	0.122	-0.022	0.592	0.322	-0.27	-0.144	-0.122	0.022	0.0175135	0.0231118	0.00559829	3.904	3.443	-0.461	-470668	-472821	-2152.89	-470700	-472858	-2158.01	-0.314	-0.275	0.039	164.275	261.453	281.889	1.25776	11.592	2.6581	-959.769	-958.05	-1.719	-0.317	-0.45	0.133
2-Propyl-1,3-dioxolane	H-Nucleophile	Dichloromethane	-1.06	0.81	-384.007	-386.407	-2.4	-0.42	-0.263	0.157	0.161	0.047	-0.114	0.1295	0.108	-0.0215	0.581	0.31	-0.271	-0.1295	-0.108	0.0215	0.0144322	0.0188129	0.00438067	1.84	1.601	-0.239	-240845	-242357	-1512.53	-240870	-242385	-1514.71	0.112	0.136	0.024	116.158	190.278	199.763	1.1516	10.177	2.2086	-959.769	-958.05	-1.719	-0.317	-0.45	0.133
2-Phenyldioxolane	H-Nucleophile	Dichloromethane	-0.9	0.8	-496.467	-499.536	-3.069	-0.34	-0.259	0.081	0.123	-0.024	-0.147	0.1085	0.1415	0.033	0.463	0.235	-0.228	-0.1085	-0.1415	-0.033	0.012713	0.0426005	0.0298875	1.755	1.528	-0.227	-311415	-313349	-1933.23	-311444	-313378	-1933.9	0.116	0.146	0.03	150.174	210.342	226.511	1.17073	10.523	2.4181	-959.769	-958.05	-1.719	-0.317	-0.45	0.133
3-Propylcyclopentene	H-Nucleophile	Dichloromethane	-0.88	0.94	-311.156	-313.354	-2.198	-0.343	-0.243	0.1	0.155	0.018	-0.137	0.094	0.1125	0.0185	0.498	0.261	-0.237	-0.094	-0.1125	-0.0185	0.00887149	0.0242457	0.0153742	0.241	0.259	0.018	-195113	-196501	-1387.15	-195140	-196528	-1388.02	0.168	0.197	0.029	110.197	200.064	218.763	1.13966	10.233	2.2714	-959.769	-958.05	-1.719	-0.317	-0.45	0.133
9,10-Dihydroanthracene	H-Nucleophile	Dichloromethane	-0.86	0.92	-537.282	-540.867	-3.585	-0.325	-0.244	0.081	0.118	-0.02	-0.138	0.1035	0.132	0.0285	0.443	0.224	-0.219	-0.1035	-0.132	-0.0285	0.0120906	0.0388929	0.0268023	0.415	0.47	0.055	-336999	-339257	-2258.2	-337027	-339286	-2258.99	0.193	0.222	0.029	180.245	245.769	281.789	1.18259	11.615	2.723	-959.769	-958.05	-1.719	-0.317	-0.45	0.133
(E,E)-2,5-heptadiene	H-Nucleophile	Dichloromethane	-0.74	0.99	-272.095	-274.015	-1.92	-0.345	-0.245	0.1	0.162	0.007	-0.155	0.0915	0.119	0.0275	0.507	0.252	-0.255	-0.0915	-0.119	-0.0275	0.00825666	0.0280972	0.0198406	0.106	0.116	0.01	-170624	-171835	-1211.13	-170651	-171862	-1211.64	0.178	0.208	0.03	96.17	198.447	201.493	1.19416	11.093	2.517	-959.769	-958.05	-1.719	-0.317	-0.45	0.133
4-Methyl-2,5-heptadiene	H-Nucleophile	Dichloromethane	-0.73	0.97	-311.136	-313.337	-2.201	-0.344	-0.245	0.099	0.157	0.008	-0.149	0.0935	0.1185	0.025	0.501	0.253	-0.248	-0.0935	-0.1185	-0.025	0.0087248	0.0277515	0.0190267	0.082	0.068	-0.014	-195102	-196491	-1388.78	-195131	-196520	-1389.34	0.178	0.212	0.034	110.197	212.764	226.212	1.18525	11.162	2.4878	-959.769	-958.05	-1.719	-0.317	-0.45	0.133
1,4-Dihydronaphthalene	H-Nucleophile	Dichloromethane	-0.07	1.03	-384.585	-387.174	-2.589	-0.321	-0.237	0.084	0.126	-0.015	-0.141	0.0975	0.126	0.0285	0.447	0.222	-0.225	-0.0975	-0.126	-0.0285	0.0106334	0.0357568	0.0251234	0.365	0.361	-0.004	-241213	-242844	-1631.31	-241238	-242870	-1632.18	0.188	0.216	0.028	130.186	197.487	216.424	1.13307	9.674	2.1537	-959.769	-958.05	-1.719	-0.317	-0.45	0.133
Phenylsilane	H-Nucleophile	Dichloromethane	0.06	0.71	-520.856	-523.03	-2.174	-0.34	-0.262	0.078	0.107	-0.029	-0.136	0.1165	0.1455	0.029	0.447	0.233	-0.214	-0.1165	-0.1455	-0.029	0.0151815	0.0454297	0.0302482	1.016	1.036	0.02	-326761	-328129	-1367.59	-326785	-328154	-1369.08	-0.217	-0.162	0.055	108.213	178.957	188.244	1.12683	8.863	1.997	-959.769	-958.05	-1.719	-0.317	-0.45	0.133
1,4-Cyclohexadiene	H-Nucleophile	Dichloromethane	0.09	0.98	-231.89	-233.483	-1.593	-0.338	-0.237	0.101	0.153	0.008	-0.145	0.0925	0.1145	0.022	0.491	0.245	-0.246	-0.0925	-0.1145	-0.022	0.00871309	0.0267556	0.0180425	0	0	0	-145428	-146433	-1004.66	-145450	-146455	-1005.04	0.183	0.212	0.029	80.1277	149.098	150.798	1.08842	7.414	1.573	-959.769	-958.05	-1.719	-0.317	-0.45	0.133
Hexylsilane	H-Nucleophile	Dichloromethane	0.19	0.73	-525.527	-527.872	-2.345	-0.411	-0.293	0.118	0.138	0.026	-0.112	0.1365	0.1335	-0.003	0.549	0.319	-0.23	-0.1365	-0.1335	0.003	0.0169693	0.0279346	0.0109653	0.986	1.079	0.093	-329631	-331110	-1478.6	-329661	-331140	-1479.26	-0.228	-0.173	0.055	116.277	225.417	245.394	1.18941	12.498	2.9616	-959.769	-958.05	-1.719	-0.317	-0.45	0.133
1,4-Cyclohexadiene	H-Nucleophile	MeCN	0.35	0.98	-231.89	-233.483	-1.593	-0.338	-0.237	0.101	0.153	0.008	-0.145	0.0925	0.1145	0.022	0.491	0.245	-0.246	-0.0925	-0.1145	-0.022	0.00871309	0.0267556	0.0180425	0	0	0	-145428	-146433	-1004.66	-145450	-146455	-1005.04	0.183	0.212	0.029	80.1277	149.098	150.798	1.08842	7.414	1.5732	-132.801	-131.97	-0.831	-0.341	-0.475	0.134
Cycloheptatriene	H-Nucleophile	Dichloromethane	0.52	0.97	-269.747	-271.584	-1.837	-0.31	-0.226	0.084	0.108	-0.043	-0.151	0.101	0.1345	0.0335	0.418	0.183	-0.235	-0.101	-0.1345	-0.0335	0.0122022	0.0494269	0.0372248	0.464	0.419	-0.045	-169179	-170337	-1157.96	-169201	-170360	-1158.28	0.186	0.212	0.026	92.138	159.137	164.965	1.09421	7.596	1.6895	-959.769	-958.05	-1.719	-0.317	-0.45	0.133
Cycloheptatriene	H-Nucleophile	MeCN	0.55	0.97	-269.747	-271.584	-1.837	-0.311	-0.227	0.084	0.107	-0.044	-0.151	0.102	0.1355	0.0335	0.418	0.183	-0.235	-0.102	-0.1355	-0.0335	0.012445	0.0501646	0.0377196	0.492	0.44	-0.052	-169179	-170337	-1157.9	-169202	-170360	-1158.21	0.187	0.213	0.026	92.1384	159.15	164.989	1.09419	7.597	1.6898	-132.801	-131.97	-0.831	-0.341	-0.475	0.134
Xanthene	H-Nucleophile	Dichloromethane	0.64	0.97	-573.109	-576.778	-3.669	-0.304	-0.221	0.083	0.111	-0.027	-0.138	0.0965	0.124	0.0275	0.415	0.194	-0.221	-0.0965	-0.124	-0.0275	0.0112196	0.0396289	0.0284093	1.696	1.537	-0.159	-359497	-361806	-2309.84	-359525	-361836	-2310.59	0.194	0.221	0.027	182.218	238.34	266.822	1.18934	11.807	2.7038	-959.769	-958.05	-1.719	-0.317	-0.45	0.133
Chlorodimethylsilane	H-Nucleophile	Dichloromethane	0.79	0.73	-828.359	-830.277	-1.918	-0.432	-0.307	0.125	0.15	0.178	0.028	0.141	0.0645	-0.0765	0.582	0.485	-0.097	-0.141	-0.0645	0.0765	0.0170799	0.00428892	-0.012791	3.619	3.511	-0.108	-519743	-520950	-1206.52	-519767	-520973	-1206.82	-0.231	-0.185	0.046	94.6154	150.656	150.791	1.09983	7.303	1.5994	-959.769	-958.05	-1.719	-0.317	-0.45	0.133
(Chloromethyl)dimethylsilane	H-Nucleophile	Dichloromethane	0.8	0.73	-867.35	-869.552	-2.202	-0.41	-0.287	0.123	0.137	-0.004	-0.141	0.1365	0.1455	0.009	0.547	0.283	-0.264	-0.1365	-0.1455	-0.009	0.0170313	0.0374033	0.020372	3.518	3.34	-0.178	-544191	-545577	-1385.89	-544217	-545604	-1386.35	-0.239	-0.189	0.05	108.642	171.933	179.642	1.11689	8.492	1.938	-959.769	-958.05	-1.719	-0.317	-0.45	0.133
Methyl(neopentyl)(phenyl)silane	H-Nucleophile	Dichloromethane	0.87	0.75	-755.139	-758.999	-3.86	-0.335	-0.255	0.08	0.118	-0.022	-0.14	0.1085	0.1385	0.03	0.453	0.233	-0.22	-0.1085	-0.1385	-0.03	0.0129937	0.0411636	0.02817	0.685	0.732	0.047	-473657	-476090	-2432.42	-473694	-476128	-2433.75	-0.245	-0.194	0.051	192.373	287.943	347.868	1.20398	12.332	3.0414	-959.769	-958.05	-1.719	-0.317	-0.45	0.133
(3-Chlorobenzyl)dimethylsilane	H-Nucleophile	Dichloromethane	1.3	0.75	-1096.94	-1100.66	-3.718	-0.327	-0.245	0.082	0.117	-0.024	-0.141	0.105	0.1345	0.0295	0.444	0.221	-0.223	-0.105	-0.1345	-0.0295	0.0124155	0.0409282	0.0285126	2.761	2.662	-0.099	-688206	-690546	-2340.26	-688239	-690580	-2341.14	-0.25	-0.198	0.052	184.738	251.038	288.745	1.18846	10.235	2.7838	-959.769	-958.05	-1.719	-0.317	-0.45	0.133
Diphenylsilane	H-Nucleophile	Dichloromethane	1.52	0.73	-750.461	-754.146	-3.685	-0.334	-0.257	0.077	0.1	-0.029	-0.129	0.117	0.143	0.026	0.434	0.228	-0.206	-0.117	-0.143	-0.026	0.0157707	0.0448443	0.0290736	1.055	1.156	0.101	-470782	-473102	-2319.43	-470812	-473135	-2322.61	-0.221	-0.17	0.051	184.309	264.693	298.943	1.22445	12	2.9713	-959.769	-958.05	-1.719	-0.317	-0.45	0.133
1,4-Dimethylcyclohexa-1,4-diene	H-Nucleophile	Dichloromethane	1.88	0.96	-309.986	-312.142	-2.156	-0.328	-0.229	0.099	0.154	0.017	-0.137	0.087	0.106	0.019	0.482	0.246	-0.236	-0.087	-0.106	-0.019	0.00785166	0.0228374	0.0149857	0	0	0	-194395	-195755	-1360.03	-194421	-195782	-1360.57	0.179	0.208	0.029	108.181	191.399	205.918	1.13518	9.46	2.0817	-959.769	-958.05	-1.719	-0.317	-0.45	0.133
Methyl(phenyl)silane	H-Nucleophile	Dichloromethane	2.13	0.73	-559.915	-562.37	-2.455	-0.339	-0.259	0.08	0.11	-0.027	-0.137	0.1145	0.143	0.0285	0.449	0.232	-0.217	-0.1145	-0.143	-0.0285	0.0145994	0.0440711	0.0294717	0.905	0.979	0.074	-351251	-352797	-1545.62	-351276	-352822	-1546.12	-0.232	-0.18	0.052	122.24	201.217	216.141	1.15548	10.175	2.2129	-959.769	-958.05	-1.719	-0.317	-0.45	0.133
1-Methylsilolane	H-Nucleophile	Dichloromethane	2.2	0.75	-485.333	-487.357	-2.024	-0.396	-0.279	0.117	0.149	0.038	-0.111	0.1235	0.1205	-0.003	0.545	0.317	-0.228	-0.1235	-0.1205	0.003	0.0139929	0.0229026	0.00890971	0.587	0.668	0.081	-304442	-305717	-1275.75	-304466	-305743	-1276.15	-0.248	-0.198	0.05	100.234	178.844	195.106	1.09955	8.321	1.769	-959.769	-958.05	-1.719	-0.317	-0.45	0.133
Dihexylsilane	H-Nucleophile	Dichloromethane	2.27	0.73	-759.8	-763.829	-4.029	-0.393	-0.277	0.116	0.148	0.036	-0.112	0.1225	0.1205	-0.002	0.541	0.313	-0.228	-0.1225	-0.1205	0.002	0.013869	0.0231953	0.00932629	1.069	1.132	0.063	-476521	-479063	-2541.4	-476564	-479107	-2542.21	-0.245	-0.192	0.053	200.436	358.834	413.091	1.33799	20.16	4.9601	-959.769	-958.05	-1.719	-0.317	-0.45	0.133
1-Methylsiletane	H-Nucleophile	Dichloromethane	2.3	0.75	-446.261	-448.007	-1.746	-0.386	-0.27	0.116	0.151	0.035	-0.116	0.1175	0.1175	0	0.537	0.305	-0.232	-0.1175	-0.1175	0	0.012855	0.0226332	0.00977822	0.777	0.799	0.022	-279944	-281044	-1099.81	-279968	-281068	-1100.2	-0.247	-0.198	0.049	86.2077	163.444	170.381	1.09988	7.925	1.6282	-959.769	-958.05	-1.719	-0.317	-0.45	0.133
Dimethyl(propoxy)silane	H-Nucleophile	Dichloromethane	2.4	0.75	-561.429	-563.853	-2.424	-0.416	-0.275	0.141	0.153	0.041	-0.112	0.1315	0.117	-0.0145	0.569	0.316	-0.253	-0.1315	-0.117	0.0145	0.0151953	0.0216598	0.00646451	1.146	1.135	-0.011	-352175	-353702	-1527.45	-352205	-353733	-1527.86	-0.289	-0.239	0.05	118.249	215.12	228.893	1.189	10.729	2.3895	-959.769	-958.05	-1.719	-0.317	-0.45	0.133
Methyldiphenylsilane	H-Nucleophile	Dichloromethane	2.72	0.73	-789.519	-793.485	-3.966	-0.332	-0.254	0.078	0.112	-0.03	-0.142	0.11	0.142	0.032	0.444	0.224	-0.22	-0.11	-0.142	-0.032	0.0136261	0.0450089	0.0313828	0.771	0.773	0.002	-495271	-497768	-2497.6	-495305	-497804	-2498.78	-0.237	-0.185	0.052	198.336	281.727	325.244	1.232	12.237	2.9768	-959.769	-958.05	-1.719	-0.317	-0.45	0.133
Benzyldimethylsilane	H-Nucleophile	Dichloromethane	2.78	0.73	-638.019	-641.037	-3.018	-0.318	-0.238	0.08	0.128	-0.012	-0.14	0.095	0.125	0.03	0.446	0.226	-0.22	-0.095	-0.125	-0.03	0.0101177	0.0345686	0.0244509	1.032	1.188	0.156	-400222	-402124	-1901.35	-400253	-402156	-1902.02	-0.252	-0.202	0.05	150.293	239.056	270.714	1.18145	11.313	2.587	-959.769	-958.05	-1.719	-0.317	-0.45	0.133
(4-Chlorophenyl)dimethylsilane	H-Nucleophile	Dichloromethane	3.05	0.73	-1057.89	-1061.33	-3.436	-0.338	-0.255	0.083	0.105	-0.033	-0.138	0.1165	0.144	0.0275	0.443	0.222	-0.221	-0.1165	-0.144	-0.0275	0.0153186	0.0467027	0.0313841	2.693	2.592	-0.101	-663724	-665886	-2162.49	-663753	-665916	-2163.19	-0.244	-0.193	0.051	170.711	233.083	260.442	1.18202	11.363	2.8284	-959.769	-958.05	-1.719	-0.317	-0.45	0.133
1,1,1,3,3-Pentamethyldisiloxane	H-Nucleophile	Dichloromethane	3.12	0.73	-851.634	-854.676	-3.042	-0.406	-0.277	0.129	0.134	0.026	-0.108	0.136	0.1255	-0.0105	0.54	0.303	-0.237	-0.136	-0.1255	0.0105	0.0171259	0.0259905	0.00886459	0.325	0.153	-0.172	-534269	-536184	-1915.38	-534306	-536221	-1914.98	-0.292	-0.242	0.05	148.351	250.95	278.547	1.21687	9.96	2.351	-959.769	-958.05	-1.719	-0.317	-0.45	0.133
Trimethylsilane	H-Nucleophile	Dichloromethane	3.15	0.73	-408.426	-409.933	-1.507	-0.429	-0.304	0.125	0.146	0.038	-0.108	0.1415	0.133	-0.0085	0.575	0.342	-0.233	-0.1415	-0.133	0.0085	0.0174107	0.0258611	0.00845046	0.658	0.725	0.067	-256208	-257157	-949.392	-256231	-257181	-949.644	-0.259	-0.209	0.05	74.197	157.519	160.858	1.10144	7.314	1.5484	-959.769	-958.05	-1.719	-0.317	-0.45	0.133
Ethyldimethylsilane	H-Nucleophile	Dichloromethane	3.3	0.73	-447.465	-449.252	-1.787	-0.408	-0.286	0.122	0.148	0.038	-0.11	0.13	0.124	-0.006	0.556	0.324	-0.232	-0.13	-0.124	0.006	0.0151978	0.0237284	0.00853055	0.714	0.777	0.063	-280685	-281812	-1126.56	-280711	-281839	-1127.04	-0.259	-0.209	0.05	88.2235	177.134	188.353	1.11492	8.622	1.8098	-959.769	-958.05	-1.719	-0.317	-0.45	0.133
Tris((dimethyl(phenyl)silyl)methyl)silane	H-Nucleophile	Dichloromethane	3.4	0.66	-2201.88	-2211.47	-9.59	-0.331	-0.249	0.082	0.118	-0.022	-0.14	0.1065	0.1355	0.029	0.449	0.227	-0.222	-0.1065	-0.1355	-0.029	0.0126306	0.0404411	0.0278105	0.654	0.626	-0.028	-1.38129e+06	-1.38733e+06	-6038.75	-1.38136e+06	-1.3874e+06	-6042.05	-0.26	-0.208	0.052	476.949	583.326	789.318	1.41254	17.46	4.904	-959.769	-958.05	-1.719	-0.317	-0.45	0.133
Diethyl(methyl)silane	H-Nucleophile	Dichloromethane	3.4	0.73	-486.504	-488.572	-2.068	-0.401	-0.281	0.12	0.148	0.036	-0.112	0.1265	0.1225	-0.004	0.549	0.317	-0.232	-0.1265	-0.1225	0.004	0.014574	0.0236692	0.00909517	0.776	0.833	0.057	-305163	-306466	-1303.75	-305191	-306496	-1304.3	-0.259	-0.21	0.049	102.25	196.719	215.884	1.13055	9.882	2.0724	-959.769	-958.05	-1.719	-0.317	-0.45	0.133
Dimethyl(neopentyl)silane	H-Nucleophile	Dichloromethane	3.55	0.73	-564.593	-567.223	-2.63	-0.402	-0.283	0.119	0.146	0.034	-0.112	0.128	0.1245	-0.0035	0.548	0.317	-0.231	-0.128	-0.1245	0.0035	0.0149489	0.0244483	0.00949944	0.664	0.727	0.063	-354126	-355784	-1658.32	-354157	-355816	-1659.17	-0.255	-0.283	-0.028	130.303	226.046	265.69	1.13119	9.881	2.29106	-959.769	-958.05	-1.719	-0.317	-0.45	0.133
Dimethyl(phenyl)silane	H-Nucleophile	Dichloromethane	3.55	0.75	-598.973	-601.709	-2.736	-0.336	-0.257	0.079	0.115	-0.024	-0.139	0.1105	0.1405	0.03	0.451	0.233	-0.218	-0.1105	-0.1405	-0.03	0.0135369	0.0423611	0.0288242	0.661	0.727	0.066	-375739	-377463	-1723.47	-375769	-377493	-1724.09	-0.246	-0.197	0.049	136.266	220.173	243.242	1.16859	10.165	2.3378	-959.769	-958.05	-1.719	-0.317	-0.45	0.133
Triethylsilane	H-Nucleophile	Dichloromethane	3.58	0.7	-525.541	-527.89	-2.349	-0.4	-0.279	0.121	0.15	0.036	-0.114	0.125	0.1215	-0.0035	0.55	0.315	-0.235	-0.125	-0.1215	0.0035	0.0142045	0.0234321	0.0092276	0.835	0.889	0.054	-329639	-331120	-1481.13	-329670	-331152	-1482.07	-0.259	-0.21	0.049	116.277	214.801	242.742	1.14164	9.851	2.2129	-959.769	-958.05	-1.719	-0.317	-0.45	0.133
Tris((trimethylsilyl)methyl)silane	H-Nucleophile	Dichloromethane	3.59	0.67	-1630.24	-1636.14	-5.8999	-0.382	-0.267	0.115	0.127	0.018	-0.109	0.1275	0.1245	-0.003	0.509	0.285	-0.224	-0.1275	-0.1245	0.003	0.0159688	0.0271934	0.0112246	0.847	0.865	0.018	-1.0227e+06	-1.02641e+06	-3715.33	-1.02275e+06	-1.02647e+06	-3718.6	-0.263	-0.212	0.051	290.74	409.538	547.293	1.26591	13.422	3.5134	-959.769	-958.05	-1.719	-0.317	-0.45	0.133
Tripropylsilane	H-Nucleophile	Dichloromethane	3.67	0.73	-642.675	-645.864	-3.189	-0.395	-0.278	0.117	0.152	0.039	-0.113	0.1215	0.1195	-0.002	0.547	0.317	-0.23	-0.1215	-0.1195	0.002	0.0134938	0.0225241	0.00903022	0.675	0.721	0.046	-403082	-405094	-2012.06	-403119	-405132	-2013.03	-0.259	-0.209	0.05	158.356	281.496	326.454	1.22795	12.419	2.9569	-959.769	-958.05	-1.719	-0.317	-0.45	0.133
Tris((butyldimethylsilyl)methyl)silane	H-Nucleophile	Dichloromethane	3.73	0.68	-1981.63	-1990.05	-8.423	-0.372	-0.259	0.113	0.13	0.02	-0.11	0.121	0.1195	-0.0015	0.502	0.279	-0.223	-0.121	-0.1195	0.0015	0.0145827	0.0255918	0.0110092	1.064	1.047	-0.017	-1.24301e+06	-1.24832e+06	-5309.38	-1.24309e+06	-1.2484e+06	-5311.79	-0.264	-0.213	0.051	416.979	597.496	796.223	1.43847	20.544	4.902	-959.769	-958.05	-1.719	-0.317	-0.45	0.133
Trihexylsilane	H-Nucleophile	Dichloromethane	3.89	0.73	-994.069	-999.781	-5.712	-0.388	-0.272	0.116	0.152	0.037	-0.115	0.118	0.1175	-0.0005	0.54	0.309	-0.231	-0.118	-0.1175	0.0005	0.0128926	0.0223402	0.00944762	0.815	0.864	0.049	-623408	-627013	-3604.8	-623465	-627071	-3606.17	-0.26	-0.209	0.051	284.596	479.885	577.288	1.43152	19.368	4.9562	-959.769	-958.05	-1.719	-0.317	-0.45	0.133
Tributylsilane	H-Nucleophile	Dichloromethane	3.99	0.73	-759.807	-763.837	-4.03	-0.391	-0.274	0.117	0.153	0.039	-0.114	0.119	0.1175	-0.0015	0.544	0.313	-0.231	-0.119	-0.1175	0.0015	0.0130156	0.0220547	0.00903909	0.831	0.875	0.044	-476525	-479068	-2542.95	-476568	-479113	-2544.32	-0.259	-0.209	0.05	200.436	348.383	410.31	1.30488	14.873	3.652	-959.769	-958.05	-1.719	-0.317	-0.45	0.133
10-Methyl-9,10-dihydroacridine	H-Nucleophile	MeCN	4	0.7	-592.314	-596.229	-3.915	-0.28	-0.198	0.082	0.119	-0.019	-0.138	0.0805	0.1085	0.028	0.399	0.179	-0.22	-0.0805	-0.1085	-0.028	0.00812061	0.0328834	0.0247628	0.99	1.344	0.354	-371519	-373986	-2466.51	-371549	-374017	-2467.46	0.192	0.218	0.026	195.26	256.294	298.308	1.18727	11.647	2.7167	-132.801	-131.97	-0.831	-0.341	-0.475	0.134
1,2,4,5-Tetramethylcyclohexa-1,4-diene	H-Nucleophile	Dichloromethane	4.27	0.86	-388.071	-390.792	-2.721	-0.319	-0.221	0.098	0.152	0.025	-0.127	0.0835	0.098	0.0145	0.471	0.246	-0.225	-0.0835	-0.098	-0.0145	0.00740154	0.0195203	0.0121188	0	0	0	-243356	-245072	-1716.54	-243387	-245104	-1716.91	0.174	0.202	0.028	136.234	226.912	257.795	1.15859	9.586	2.333	-959.769	-958.05	-1.719	-0.317	-0.45	0.133
((Dimethylsilyl)methyl)trimethylsilane	H-Nucleophile	Dichloromethane	4.86	0.64	-815.7	-818.671	-2.971	-0.397	-0.279	0.118	0.137	0.029	-0.108	0.13	0.125	-0.005	0.534	0.308	-0.226	-0.13	-0.125	0.005	0.015824	0.0253653	0.00954129	0.785	0.825	0.04	-511705	-513576	-1871.4	-511740	-513612	-1872.18	-0.259	-0.21	0.049	146.378	247.045	290.677	1.16437	10.461	2.427	-959.769	-958.05	-1.719	-0.317	-0.45	0.133
1,3,5-Trimethylcyclohexa-1,4-diene	H-Nucleophile	Dichloromethane	4.95	0.79	-349.03	-351.467	-2.437	-0.329	-0.23	0.099	0.148	0.017	-0.131	0.0905	0.1065	0.016	0.477	0.247	-0.23	-0.0905	-0.1065	-0.016	0.00858517	0.02296	0.0143749	0.578	0.582	0.004	-218877	-220414	-1537.01	-218904	-220442	-1537.73	0.174	0.205	0.031	122.207	211.925	233.434	1.1561	9.26	2.184	-959.769	-958.05	-1.719	-0.317	-0.45	0.133
5-(4-(Methoxy)benzyl)-2,2-dimethyl-4,6-dioxo-1,3-dioxan-5-ide	H-Nucleophile	MeCN	6.21	0.68	-913.566	-919.047	-5.481	-0.278	-0.182	0.096	0.133	-0.008	-0.141	0.0725	0.095	0.0225	0.411	0.174	-0.237	-0.0725	-0.095	-0.0225	0.00639446	0.0259339	0.0195394	9.126	9.641	0.515	-573081	-576531	-3450.84	-573120	-576572	-3452.03	0.182	0.205	0.023	263.266	314.062	363.949	1.27422	14.385	3.4299	-132.801	-131.97	-0.831	-0.341	-0.475	0.134
5-(4-(Dimethylamino)benzyl)-2,2-dimethyl-4,6-dioxo-1,3-dioxan-5-ide	H-Nucleophile	MeCN	7.15	0.81	-932.765	-938.493	-5.728	-0.27	-0.179	0.091	0.138	-0.001	-0.139	0.066	0.09	0.024	0.408	0.178	-0.23	-0.066	-0.09	-0.024	0.00533824	0.0227528	0.0174146	7.23	8.299	1.069	-585100	-588708	-3607.64	-585142	-588751	-3608.84	0.179	0.204	0.025	276.308	337.169	396.652	1.29171	14.886	3.7071	-132.801	-131.97	-0.831	-0.341	-0.475	0.134
Bromoborane-triethylamine-complex	H-Nucleophile	Dichloromethane	7.49	0.75	-2888.72	-2892.76	-4.042	-0.366	-0.25	0.116	0.149	0.032	-0.117	0.1085	0.109	0.0005	0.515	0.282	-0.233	-0.1085	-0.109	-0.0005	0.0114294	0.0210656	0.00963623	9.639	8.828	-0.811	-1.81254e+06	-1.81508e+06	-2545.52	-1.81257e+06	-1.81511e+06	-2546.14	-0.116	-0.071	0.045	193.921	219.746	265.827	1.09929	8.977	2.2453	-959.769	-958.05	-1.719	-0.317	-0.45	0.133
N-phenyl-1,4-dihydronicotineamide	H-Nucleophile	Dichloromethane	7.53	0.87	-645.319	-649.397	-4.078	-0.281	-0.196	0.085	0.112	-0.042	-0.154	0.0845	0.119	0.0345	0.393	0.154	-0.239	-0.0845	-0.119	-0.0345	0.00908429	0.0459773	0.036893	6.436	5.779	-0.657	-404789	-407357	-2568.04	-404823	-407391	-2568.8	0.181	0.208	0.027	200.236	261.34	294.095	1.22218	12.348	3.0634	-959.769	-958.05	-1.719	-0.317	-0.45	0.133
N-(p-tolyl)-1,4-dihydronicotineamide	H-Nucleophile	Dichloromethane	7.68	0.95	-684.365	-688.725	-4.36	-0.279	-0.194	0.085	0.113	-0.041	-0.154	0.083	0.1175	0.0345	0.392	0.153	-0.239	-0.083	-0.1175	-0.0345	0.00878699	0.0451185	0.0363315	7.087	6.498	-0.589	-429272	-432017	-2745.73	-429309	-432055	-2745.72	0.18	0.207	0.027	214.263	283.932	322.266	1.24928	13.386	3.3193	-959.769	-958.05	-1.719	-0.317	-0.45	0.133
Borane-trimethylamine-complex	H-Nucleophile	Dichloromethane	7.97	0.75	-199.763	-201.21	-1.447	-0.422	-0.29	0.132	0.147	0.031	-0.116	0.1375	0.1295	-0.008	0.569	0.321	-0.248	-0.1375	-0.1295	0.008	0.0166136	0.0261219	0.00950831	6.429	6.327	-0.102	-125246	-126159	-913.578	-125268	-126182	-913.978	-0.114	-0.071	0.043	72.945	154.305	165.523	1.05859	6.811	1.508	-959.769	-958.05	-1.719	-0.317	-0.45	0.133
2-(4-Nitrophenyl)-1,3-dimethyl-benzimidazoline	H-Nucleophile	MeCN	8.36	0.71	-889.911	-895.461	-5.55	-0.278	-0.189	0.089	0.05	-0.104	-0.154	0.114	0.1465	0.0325	0.328	0.085	-0.243	-0.114	-0.1465	-0.0325	0.019811	0.126249	0.106438	6.09	4.993	-1.097	-558230	-561724	-3494.56	-558269	-561765	-3496.33	0.138	0.164	0.026	269.298	318.217	376.177	1.26294	14.501	3.6447	-132.801	-131.97	-0.831	-0.341	-0.475	0.134
Borane-N,N-diethylaniline-complex	H-Nucleophile	Dichloromethane	8.53	0.75	-468.379	-471.625	-3.246	-0.347	-0.267	0.08	0.117	-0.027	-0.144	0.115	0.147	0.032	0.464	0.24	-0.224	-0.115	-0.147	-0.032	0.0142511	0.0450188	0.0307677	6.204	6.185	-0.019	-293729	-295775	-2046.51	-293761	-295808	-2047.11	-0.111	-0.065	0.046	163.068	245.189	296.505	1.14043	9.785	2.3802	-959.769	-958.05	-1.719	-0.317	-0.45	0.133
N-benzyl-1,4-dihydronicotineamide	H-Nucleophile	Dichloromethane	8.67	0.82	-684.363	-688.718	-4.355	-0.285	-0.194	0.091	0.114	-0.039	-0.153	0.0855	0.1165	0.031	0.399	0.155	-0.244	-0.0855	-0.1165	-0.031	0.00916071	0.0437815	0.0346207	7.017	6.798	-0.219	-429270	-432013	-2743.55	-429306	-432050	-2744.44	0.176	0.2	0.024	214.263	283.173	322.883	1.24436	11.789	3.17	-959.769	-958.05	-1.719	-0.317	-0.45	0.133
2-(4-(Trifluoromethyl)phenyl)-1,3-dimethyl-benzimidazoline	H-Nucleophile	MeCN	8.74	0.71	-1022.1	-1028.04	-5.946	-0.276	-0.187	0.089	0.102	-0.046	-0.148	0.087	0.1165	0.0295	0.378	0.141	-0.237	-0.087	-0.1165	-0.0295	0.0100119	0.0481285	0.0381166	3.819	3.107	-0.712	-641174	-644918	-3743.23	-641215	-644960	-3744.92	0.136	0.162	0.026	292.299	325.83	385.18	1.27293	14.55	3.821	-132.801	-131.97	-0.831	-0.341	-0.475	0.134
Borane-N,N-diisopropylaniline-complex	H-Nucleophile	Dichloromethane	8.84	0.75	-546.442	-550.254	-3.812	-0.343	-0.262	0.081	0.119	-0.026	-0.145	0.112	0.144	0.032	0.462	0.236	-0.226	-0.112	-0.144	-0.032	0.0135758	0.0439322	0.0303564	6.194	6.155	-0.039	-342674	-345079	-2404.44	-342708	-345113	-2405.74	-0.109	-0.062	0.047	191.121	268.071	342.106	1.13344	10.494	2.5681	-959.769	-958.05	-1.719	-0.317	-0.45	0.133
Borane-triethylamine-complex	H-Nucleophile	Dichloromethane	8.9	0.75	-316.878	-319.171	-2.293	-0.414	-0.282	0.132	0.152	0.036	-0.116	0.131	0.123	-0.008	0.566	0.318	-0.248	-0.131	-0.123	0.008	0.0151599	0.0237877	0.00862784	6.288	6.167	-0.121	-198677	-200125	-1447.73	-198705	-200154	-1448.6	-0.115	-0.069	0.046	115.025	203.196	241.149	1.08471	9.03	2.042	-959.769	-958.05	-1.719	-0.317	-0.45	0.133
Diethyl 1,4-dihydro-2,6-dimethyl-3,5-pyridinedicarboxylate (Hantzsch ester)	H-Nucleophile	Dichloromethane	9	0.9	-857.5	-862.742	-5.242	-0.295	-0.205	0.09	0.098	-0.057	-0.155	0.0985	0.131	0.0325	0.393	0.148	-0.245	-0.0985	-0.131	-0.0325	0.0123438	0.0579764	0.0456325	9.229	8.773	-0.456	-537870	-541173	-3302.95	-537914	-541219	-3304.65	0.176	0.205	0.029	253.294	330.849	382.137	1.29939	16.363	3.6118	-959.769	-958.05	-1.719	-0.317	-0.45	0.133
Borane-N-ethyl-N-isopropylaniline-complex	H-Nucleophile	Dichloromethane	9.12	0.75	-507.414	-510.943	-3.529	-0.345	-0.264	0.081	0.118	-0.026	-0.144	0.1135	0.145	0.0315	0.463	0.238	-0.225	-0.1135	-0.145	-0.0315	0.0139117	0.0441702	0.0302585	6.174	6.152	-0.022	-318204	-320429	-2225.16	-318237	-320463	-2226.32	-0.109	-0.063	0.046	177.094	257.669	319.86	1.13941	10.427	2.4877	-959.769	-958.05	-1.719	-0.317	-0.45	0.133
2-(3-Chlorophenyl)-1,3-dimethyl-benzimidazoline	H-Nucleophile	MeCN	9.38	0.71	-1145.31	-1150.52	-5.217	-0.276	-0.187	0.089	0.111	-0.035	-0.146	0.0825	0.111	0.0285	0.387	0.152	-0.235	-0.0825	-0.111	-0.0285	0.0087936	0.0405296	0.031736	4.783	4.689	-0.094	-718502	-721787	-3285	-718539	-721825	-3286.62	0.136	0.162	0.026	258.746	311.707	368.093	1.25516	12.986	3.2895	-132.801	-131.97	-0.831	-0.341	-0.475	0.134
2-Phenyl-1,3-dimethyl-benzimidazoline	H-Nucleophile	MeCN	9.72	0.72	-686.374	-690.891	-4.517	-0.287	-0.191	0.096	0.126	-0.016	-0.142	0.0805	0.1035	0.023	0.413	0.175	-0.238	-0.0805	-0.1035	-0.023	0.00784534	0.0306064	0.0227611	2.826	2.981	0.155	-430512	-433358	-2846.73	-430547	-433393	-2845.99	0.172	0.196	0.024	224.301	293.788	347.808	1.22856	12.326	2.9724	-132.801	-131.97	-0.831	-0.341	-0.475	0.134
Borane-pyridine-complex	H-Nucleophile	Dichloromethane	10.01	0.75	-273.193	-275.031	-1.838	-0.375	-0.277	0.098	0.076	-0.07	-0.146	0.1495	0.1735	0.024	0.451	0.207	-0.244	-0.1495	-0.1735	-0.024	0.0247785	0.0727107	0.0479322	8.486	8.337	-0.149	-171346	-172504	-1157.7	-171370	-172528	-1157.6	-0.115	-0.06	0.055	92.9347	164.692	169.214	1.11336	8.352	1.7512	-959.769	-958.05	-1.719	-0.317	-0.45	0.133
Borane-2,6-lutidine-complex	H-Nucleophile	Dichloromethane	10.33	0.75	-351.282	-353.685	-2.403	-0.352	-0.272	0.08	0.082	-0.062	-0.144	0.135	0.167	0.032	0.434	0.21	-0.224	-0.135	-0.167	-0.032	0.0209965	0.0664024	0.0454058	7.5	7.178	-0.322	-220309	-221824	-1514.87	-220336	-221852	-1515.79	-0.112	-0.063	0.049	120.988	198.238	219.991	1.12505	9.017	2.0418	-959.769	-958.05	-1.719	-0.317	-0.45	0.133
Borane-4-tBu-pyridine-complex	H-Nucleophile	Dichloromethane	10.46	0.75	-429.369	-432.33	-2.961	-0.372	-0.272	0.1	0.082	-0.065	-0.147	0.145	0.1685	0.0235	0.454	0.207	-0.247	-0.145	-0.1685	-0.0235	0.0231553	0.0685803	0.045425	9.591	9.535	-0.056	-269271	-271138	-1867.01	-269302	-271168	-1865.96	-0.117	-0.07	0.047	149.041	238.828	275.097	1.16775	10.784	2.4986	-959.769	-958.05	-1.719	-0.317	-0.45	0.133
Tetrahydroborate ion	H-Nucleophile	Water	10.8	0.6	-27.086	-27.375	-0.289	-0.394	-0.265	0.129	0.196	0.09	-0.106	0.099	0.0875	-0.0115	0.59	0.355	-0.235	-0.099	-0.0875	0.0115	0.00830593	0.0107835	0.00247752	0	0	0	-16972.2	-17154.6	-182.335	-16985.7	-17168	-182.348	-0.123	-0.08	0.043	14.8427	77.309	61.5166	1.02602	4.409	0.6411	-76.455	-76.055	-0.4	-0.304	-0.505	0.201
[truncated: 24 more columns]
