# Supplementary material for: A machine learning approach for predicting the nucleophilicity of organic molecules
Source: Royal Society of Chemistry journal article supplement (doi:10.1039/d1cp05072a), 2021-12-06
Supplement: d1cp05072a2.pdf [file d1cp05072a2.pdf]

# Machine Learning Approach for Predicting Nucleophilicities of Organic Molecules

## Contents

|                                                                                                    |   |
|----------------------------------------------------------------------------------------------------|---|
| General Information .....                                                                          | 2 |
| Descriptors .....                                                                                  | 2 |
| Units .....                                                                                        | 2 |
| Descriptor Info .....                                                                              | 2 |
| Figures .....                                                                                      | 5 |
| References .....                                                                                   | 9 |
| <br>                                                                                               |   |
| Figure S1. Correlation matrix of whole data set. ....                                              | 5 |
| Figure S2. Correlation matrix of truncated data set (consisting of 26 descriptors) .....           | 6 |
| Figure S3. Summary of the hyperparameters used in Neural Network model. ....                       | 7 |
| Figure S4. Relative feature importance depicting Pearson coefficient of 27 descriptors with N..... | 8 |

## General Information

The nucleophilicity N index values and corresponding nucleophile and solvent information was acquired from Mayr's database.<sup>1</sup> Molecules were drawn on Gauss View 6 and computations were performed on Gaussian 09 D.01 suit.<sup>2,3</sup> The geometry optimization and frequency calculations were performed on B3LYP/6311G(d,p) for DFT and 6311G(d,p) for HF. Minima was confirmed by vibrational frequency calculations showing no imaginary frequency. NBO charges were obtained using "NPA only" keyword in the population analysis section in Gaussian. Molecular mass and steric parameters, namely, total surface area (S.A.), volume (V), radius of gyration ( $R_G$ ) and diameter of molecule ( $R_D$ ), were obtained using Multiwfn 3.7 software<sup>4</sup>. Ovality (O) was obtained from volume and surface area. Structures optimized at the DFT level of theory using B3LYP/6311G(d,p) method were used as input for calculation of these steric parameters. For machine learning all the calculations were performed on google colab using Python framework.<sup>5</sup> Data analysis and pre-processing was done using Pandas, NumPy and Scikit-learn libraries. Model development was performed using Scikit-learn and Keras libraries. Visualization of data was done on Seaborn and Matplotlib libraries.

## Descriptors

### Units

Total energy (E), energies of HOMO and LUMO, electronegativity ( $\chi$ ), chemical hardness ( $\eta$ ), chemical potential ( $\mu$ ), electrophilicity index ( $\omega$ ), dipole moment (d), free energy (G), enthalpy (H) and their correlation contribution (CORR), (all quantum-mechanical descriptors in a.u., 1a.u.=27.21165 eV, 627.50956 kcal/mol, thermodynamic descriptors in Kcal/mol), dipole moment in Debye and NBO charges in Coulombs calculated with HF/6-311G (d,p) and DFT/B3LYP/6-311G(d,p) level of the theory). Molecular Mass (MM) in amu, Radius of Gyration (Rg) and Diameter in Angstrom (A), Surface Area in  $A^2$  and Volume in  $A^3$ .<sup>6</sup>

### Descriptor Info

Table S1. List of calculated quantum chemical descriptors used in this study.

| S.No. | Notation    |              | Definition                                       | Source/Formula        |
|-------|-------------|--------------|--------------------------------------------------|-----------------------|
|       | Nucleophile | Solvent      |                                                  |                       |
| 1.    | EHF         | E*HF         | Total energy-HF                                  | Gaussian 09           |
| 2.    | EDFT        | E*DFT        | Total energy-DFT                                 | Gaussian 09           |
| 3.    | ECORR       | E*CORR       | Electron correlation contribution of E           | EDFT-EHF              |
| 4.    | EHF(HOMO)   | E*HF(HOMO)   | Energy of highest occupied molecular orbital-HF  | Gaussian 09           |
| 5.    | EDFT(HOMO)  | E*DFT(HOMO)  | Energy of highest occupied molecular orbital-DFT | Gaussian 09           |
| 6.    | ECORR(HOMO) | E*CORR(HOMO) | Electron correlation contribution of HOMO        | EDFT(HOMO)- EHF(HOMO) |
| 7.    | EHF(LUMO)   | E*HF(LUMO)   | Energy of lowest unoccupied                      | Gaussian 09           |

|     |                        |                          |                                                       |                                                           |
|-----|------------------------|--------------------------|-------------------------------------------------------|-----------------------------------------------------------|
|     |                        |                          | molecular orbital-<br>HF                              |                                                           |
| 8.  | EDFT(LUMO)             | E*DFT(LUMO)              | Energy of lowest unoccupied molecular orbital-<br>DFT | Gaussian 09                                               |
| 9.  | ECORR(LUMO)            | E*CORR(LUMO)             | Electron correlation contribution of LUMO             | EDFT(LUMO)- EHF(LUMO)                                     |
| 10. | $\chi_{\text{HF}}$     | $\chi^*_{\text{HF}}$     | Electronegativity -<br>HF                             | $-(\text{EHF}(\text{HOMO})+\text{EHF}(\text{LUMO}))/2$    |
| 11. | $\chi_{\text{DFT}}$    | $\chi^*_{\text{DFT}}$    | Electronegativity -<br>DFT                            | $-(\text{EDFT}(\text{HOMO})+\text{EDFT}(\text{LUMO}))/2$  |
| 12. | $\chi_{\text{CORR}}$   | $\chi^*_{\text{CORR}}$   | Electron correlation contribution of EN               | $\chi_{\text{DFT}} - \chi_{\text{HF}}$                    |
| 13. | $\eta_{\text{HF}}$     | $\eta^*_{\text{HF}}$     | Chemical hardness -<br>HF                             | $\text{EHF}(\text{LUMO}) - \text{EHF}(\text{HOMO})$       |
| 14. | $\eta_{\text{DFT}}$    | $\eta^*_{\text{DFT}}$    | Chemical hardness -<br>DFT                            | $\text{EDFT}(\text{LUMO}) - \text{EDFT}(\text{HOMO})$     |
| 15. | $\eta_{\text{CORR}}$   | $\eta^*_{\text{CORR}}$   | Electron correlation contribution of $\eta$           | $\eta_{\text{DFT}} - \eta_{\text{HF}}$                    |
| 16. | $\mu_{\text{HF}}$      | $\mu^*_{\text{HF}}$      | Chemical potential -<br>HF                            | $(\text{EHF}(\text{HOMO}) + \text{EHF}(\text{LUMO}))/2$   |
| 17. | $\mu_{\text{DFT}}$     | $\mu^*_{\text{DFT}}$     | Chemical potential -<br>DFT                           | $(\text{EDFT}(\text{HOMO}) + \text{EDFT}(\text{LUMO}))/2$ |
| 18. | $\mu_{\text{CORR}}$    | $\mu^*_{\text{CORR}}$    | Electron correlation contribution of $\mu$            | $\mu_{\text{DFT}} - \mu_{\text{HF}}$                      |
| 19. | $\omega_{\text{HF}}$   | $\omega^*_{\text{HF}}$   | Electrophilicity index - HF                           | $\mu_{\text{HF}}^2/2\eta_{\text{HF}}$                     |
| 20. | $\omega_{\text{DFT}}$  | $\omega^*_{\text{DFT}}$  | Electrophilicity index - DFT                          | $\mu_{\text{DFT}}^2/2\eta_{\text{DFT}}$                   |
| 21. | $\omega_{\text{CORR}}$ | $\omega^*_{\text{CORR}}$ | Electron correlation contribution of $\omega$         | $\omega_{\text{DFT}} - \omega_{\text{HF}}$                |
| 22. | dHF                    | d*HF                     | Dipole moment - HF                                    | Gaussian 09                                               |
| 23. | dDFT                   | d*DFT                    | Dipole moment - DFT                                   | Gaussian 09                                               |
| 24. | dCORR                  | d*CORR                   | Electron correlation contribution of d                | dDFT- dHF                                                 |
| 25. | HHF                    | H*HF                     | Enthalpy - HF                                         | Gaussian 09                                               |
| 26. | HDFT                   | H*DFT                    | Enthalpy - DFT                                        | Gaussian 09                                               |
| 27. | HCORR                  | H*CORR                   | Electron correlation contribution of H                | HDFT- HHF                                                 |
| 28. | GHF                    | G*HF                     | Gibbs free energy -<br>HF                             | Gaussian 09                                               |
| 29. | GDFT                   | G*DFT                    | Gibbs free energy -<br>DFT                            | Gaussian 09                                               |

|     |              |        |                                          |                                                       |
|-----|--------------|--------|------------------------------------------|-------------------------------------------------------|
| 30. | GCORR        | G*CORR | Electron correlation contribution of G   | GDFT- GHF                                             |
| 31. | NBOHF        |        | Natural bond orbital charge - HF         | Gaussian 09                                           |
| 32. | NBODFT       |        | Natural bond orbital charge - DFT        | Gaussian 09                                           |
| 33. | NBOCORR      |        | Electron correlation contribution of NBO | NBODFT- NBOHF                                         |
| 34. | Mol. Mass    |        | Molecular Mass                           | Multiwfn 3.7                                          |
| 35. | Surface Area |        | Surface Area                             | Multiwfn 3.7                                          |
| 36. | Volume       |        | Volume                                   | Multiwfn 3.7                                          |
| 37. | Ovality      |        | Ovality                                  | $A/4\pi(3V/4\pi)^{2/3}$<br>(V=Volume, A=Surface area) |
| 38. | Diameter     |        | Diameter of molecule                     | Multiwfn 3.7                                          |
| 39. | Rg           |        | Radius of gyration                       | Multiwfn 3.7                                          |

# Figures

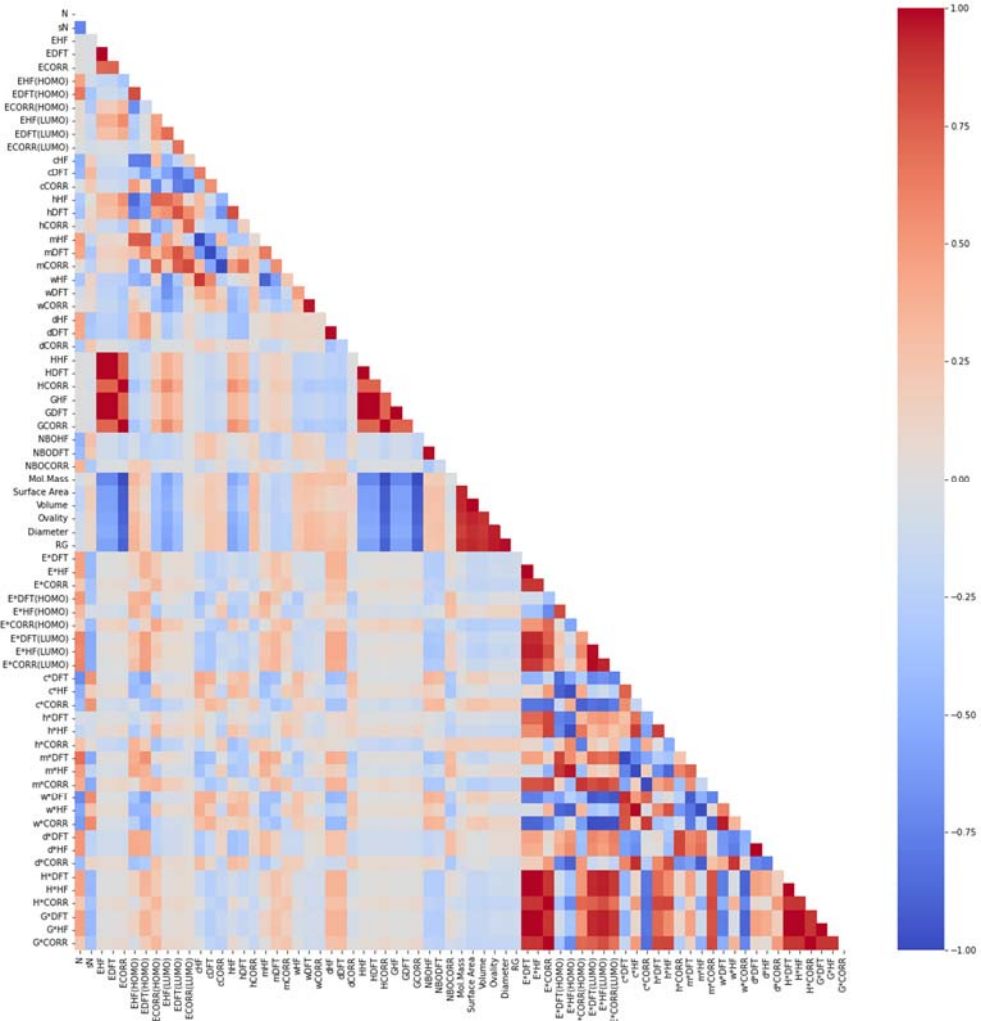

Figure S1. Correlation matrix of whole data set.

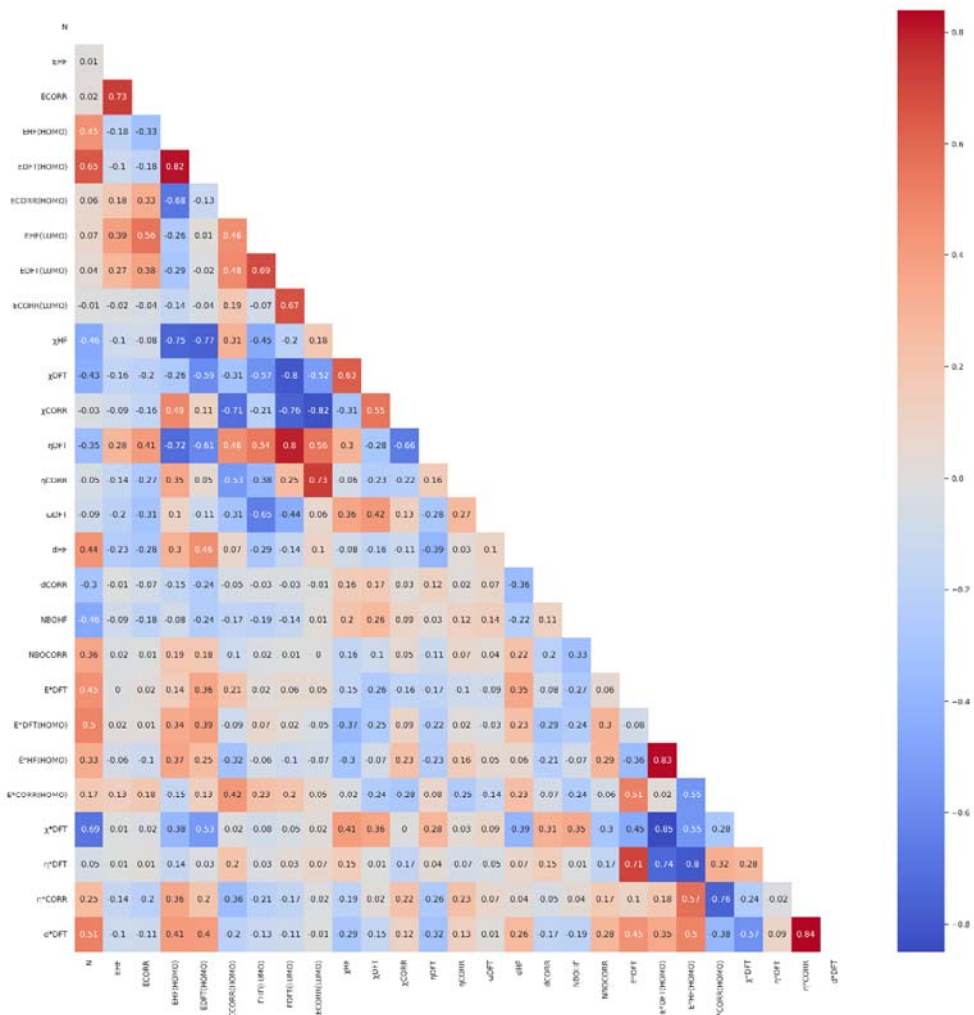

Figure S2. Correlation matrix of truncated data set (consisting of 26 descriptors)

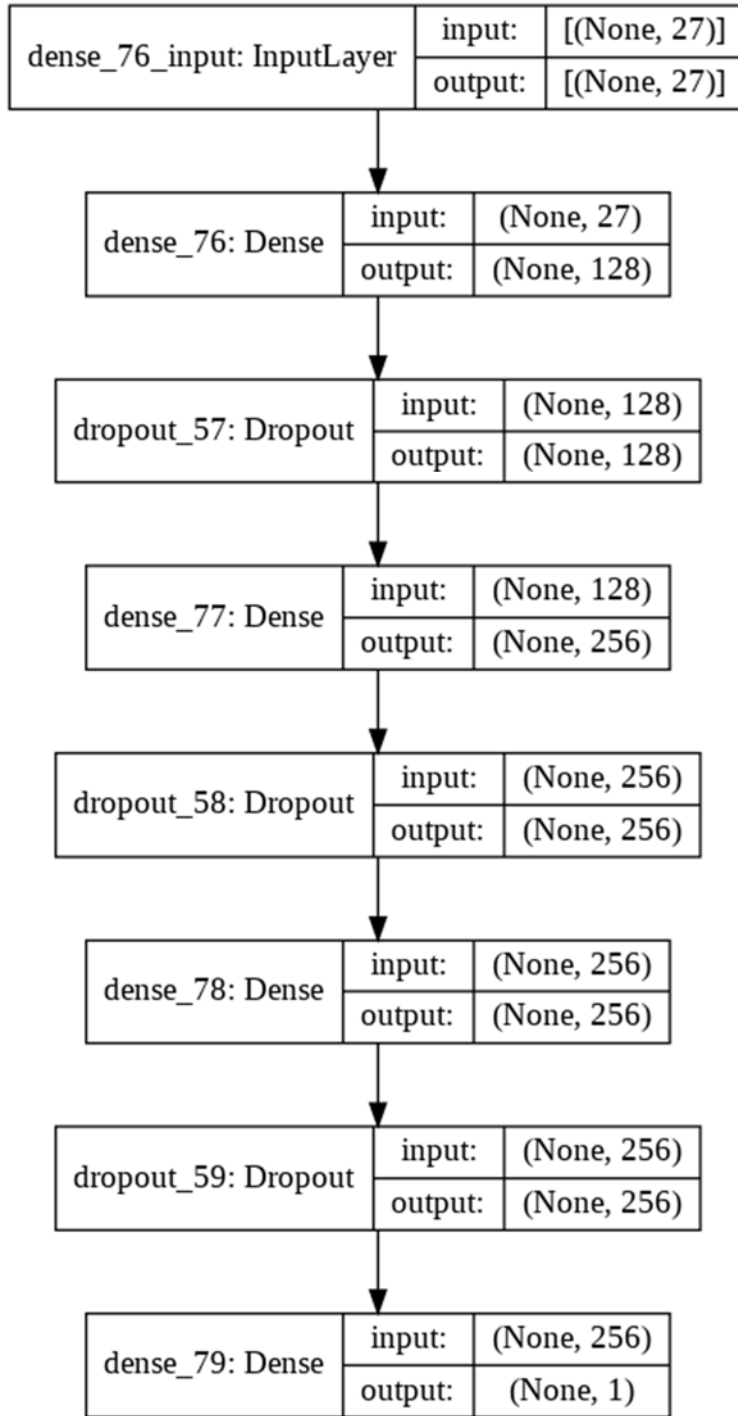

Figure S3. Summary of the hyper parameters used in Neural Network model.

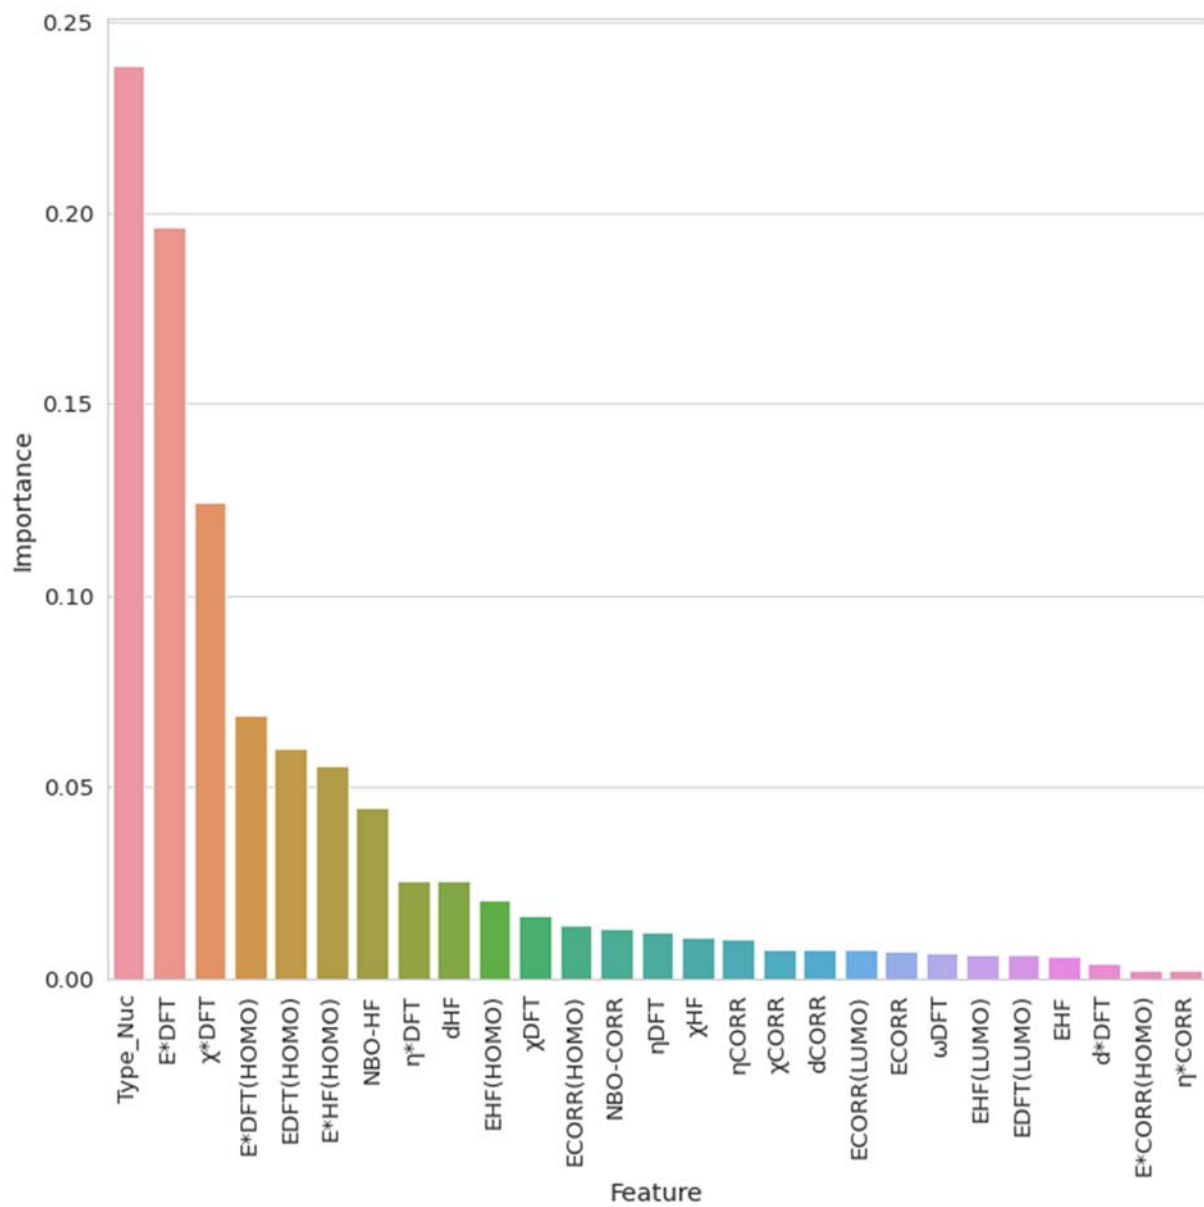

Figure S4. Relative feature importance depicting Pearson coefficient of 27 descriptors with  $N$ .



## References

- (1) Link for Mayr's database: <https://www.cup.lmu.de/oc/mayr/reaktionsdatenbank/>
- (2) Frisch, M. J.; Trucks, G. W.; Schlegel, H. B.; Scuseria, G. E.; Robb, M. A.; Cheeseman, J. R.; Scalmani, G.; Barone, V.; Mennucci, B.; Petersson, G. A.; Nakatsuji, H.; Caricato, M.; Li, X.; Hratchian, H. P.; Izmaylov, A. F.; Bloino, J.; Zheng, G.; Sonnenberg, J. L.; Hada, M.; Ehara, M.; Toyota, K.; Fukuda, R.; Hasegawa, J.; Ishida, M.; Nakajima, T.; Honda, Y.; Kitao, O.; Nakai, H.; Vreven, T.; Montgomery, J. A., Jr.; Peralta, J. E.; Ogliaro, F.; Bearpark, M.; Heyd, J. J.; Brothers, E.; Kudin, K. N.; Staroverov, V. N.; Kobayashi, R.; Normand, J.; Raghavachari, K.; Rendell, A.; Burant, J. C.; Iyengar, S. S.; Tomasi, J.; Cossi, M.; Rega, N.; Millam, J. M.; Klene, M.; Knox, J. E.; Cross, J. B.; Bakken, V.; Adamo, C.; Jaramillo, J.; Gomperts, R.; Stratmann, R. E.; Yazyev, O.; Austin, A. J.; Cammi, R.; Pomelli, C.; Ochterski, J. W.; Martin, R. L.; Morokuma, K.; Zakrzewski, V. G.; Voth, G. A.; Salvador, P.; Dannenberg, J. J.; Dapprich, S.; Daniels, A. D.; Farkas, Ö.; Foresman, J. B.; Ortiz, J. V.; Cioslowski, J.; Fox, D. J. *Gaussian 09*, Revision D.01; Gaussian, Inc.: Wallingford CT, 2009.
- (3) Dennington, Roy; Keith, Todd A.; Millam, John M. Semichem Inc., Shawnee Mission, KS, *GaussView*, Version 6, 2016.
- (4) Lu, T.; Chen, F., Multiwfn: A multifunctional wavefunction analyzer. *J. Comput. Chem.* **2012**, 33 (5), 580-592.
- (5) Van Rossum, G., & Drake Jr, F. L. (1995). *Python tutorial*. Centrum voor Wiskunde en Informatica Amsterdam, The Netherlands.
- (6) Karelson, M.; Lobanov, V. S.; Katritzky, A. R., Quantum-Chemical Descriptors in QSAR/QSPR Studies. *Chem. Rev.* **1996**, 96 (3), 1027-1044.
